# Supplementary material for: Investigation of the synthetic and mechanistic aspects of the highly stereoselective transformation of α-thioamides to α-thio-β-chloroacrylamides
Source: Royal Society of Chemistry journal article supplement (doi:10.1039/b618540a), 2007-01-01
Supplement: b618540a.pdf [file b618540a.pdf]

## Synthesis of $\alpha$ -thioamide precursors

The  $\alpha$ -thioamides were prepared in two steps: formation of the  $\alpha$ -chloroamides followed by nucleophilic substitution of the chloride to yield the  $\alpha$ -thioamides as summarised in Table 1.

Table 1. Synthesis of  $\alpha$ -thioamides

| <b>R<sup>1</sup></b>                  | <b>R<sup>2</sup></b> | <b>R<sup>3</sup></b>                             | <b>Method</b> | <b>Sulfide</b> | <b>% Yield<sup>†</sup></b> |
|---------------------------------------|----------------------|--------------------------------------------------|---------------|----------------|----------------------------|
| <i>p</i> -Tol                         | H                    | Ph                                               | A             | <b>1</b>       | 86                         |
| Bn                                    | H                    | Ph                                               | A             | <b>9</b>       | 85                         |
| Et                                    | H                    | Ph                                               | B             | <b>10</b>      | 87                         |
| <i>i</i> -Pr                          | H                    | Ph                                               | B             | <b>11</b>      | 72                         |
| <i>n</i> -Bu                          | H                    | Ph                                               | B             | <b>12</b>      | 88                         |
| Me                                    | H                    | Ph                                               | B             | <b>13</b>      | 42                         |
| Allyl                                 | H                    | Ph                                               | B             | <b>14</b>      | 83                         |
| Cinnamyl                              | H                    | Ph                                               | C             | <b>15</b>      | 52 <sup>‡</sup>            |
| 4-F-C <sub>6</sub> H <sub>4</sub>     | H                    | Ph                                               | A             | <b>16</b>      | 96                         |
| H                                     | H                    | Ph                                               | A             | <b>17</b>      | 58 <sup>§</sup>            |
| Ph                                    | Ph                   | Ph                                               | C             | <b>18</b>      | 34 <sup>¶</sup>            |
| Me                                    | Me                   | Ph                                               | A             | <b>19</b>      | 60                         |
| ( <i>R/S</i> )-CH(CH <sub>3</sub> )Ph | H                    | Ph                                               | C             | <b>20</b>      | 36                         |
| ( <i>S</i> )-CH(CH <sub>3</sub> )Ph   | H                    | Ph                                               | C             | <b>21</b>      | 58                         |
| Bn                                    | H                    | <i>n</i> -Bu                                     | D             | <b>22</b>      | 90                         |
| <i>p</i> -Tol                         | H                    | <i>n</i> -Bu                                     | D             | <b>23</b>      | 84                         |
| 4-F-C <sub>6</sub> H <sub>4</sub>     | H                    | <i>n</i> -Bu                                     | D             | <b>24</b>      | 96                         |
| <i>p</i> -Tol                         | H                    | 4-MeO-C <sub>6</sub> H <sub>4</sub>              | C             | <b>25</b>      | 75                         |
| Bn                                    | H                    | 4-MeO-C <sub>6</sub> H <sub>4</sub>              | C             | <b>26</b>      | 84                         |
| Et                                    | H                    | 4-MeO-C <sub>6</sub> H <sub>4</sub>              | C             | <b>27</b>      | 88                         |
| H                                     | H                    | 4-MeO-C <sub>6</sub> H <sub>4</sub>              | C             | <b>132</b>     | 75                         |
| Me                                    | Me                   | 4-MeO-C <sub>6</sub> H <sub>4</sub>              | C             | <b>28</b>      | 59                         |
| Ph                                    | Ph                   | 4-MeO-C <sub>6</sub> H <sub>4</sub>              | C             | <b>133</b>     | 75                         |
| <i>p</i> -Tol                         | H                    | 4-NO <sub>2</sub> -C <sub>6</sub> H <sub>4</sub> | E             | <b>29</b>      | 68                         |
| <i>p</i> -Tol                         | H                    | <i>i</i> -Bu                                     | A             | <b>30</b>      | 77                         |
| 4-F-C <sub>6</sub> H <sub>4</sub>     | H                    | <i>i</i> -Bu                                     | A             | <b>31</b>      | 84                         |
| Et                                    | H                    | <i>i</i> -Bu                                     | B             | <b>32</b>      | 68                         |
| <i>i</i> -Pr                          | H                    | <i>i</i> -Bu                                     | B             | <b>134</b>     | 68                         |
| 4-F-C <sub>6</sub> H <sub>4</sub>     | H                    | <i>i</i> -Pr                                     | A             | <b>33</b>      | 86                         |
| Bn                                    | H                    | Bn                                               | A             | <b>34</b>      | 74                         |
| 4-F-C <sub>6</sub> H <sub>4</sub>     | H                    | Bn                                               | A             | <b>35</b>      | 83                         |
| <i>n</i> -Bu                          | H                    | Bn                                               | B             | <b>36</b>      | 60                         |
| Me                                    | Me                   | Bn                                               | A             | <b>37</b>      | 65                         |
| <i>p</i> -Tol                         | H                    | Bn                                               | A             | <b>38</b>      | 52                         |
| Me                                    | H                    | Bn                                               | A             | <b>39</b>      | 51                         |

|    |   |    |   |           |                 |
|----|---|----|---|-----------|-----------------|
| Ph | H | Bn | A | <b>40</b> | 64              |
| H  | H | Bn | A | <b>41</b> | 30 <sup>§</sup> |

Method A: 1.2 eq Na, 1.2 eq RSH, Ethanol, RT, 16 hr  
Method B: 1.05 eq NaH, 1.1 eq RSH, DMF, RT, 16 hr  
Method C: 2.2 eq Na, 1.1 eq RSH, Ethanol, RT 16 hr  
Method D: 1.5 eq Na, 1.5 eq RSH, Ethanol, RT, 16 hr  
Method E: 1.5 eq NaH, 1.5 eq RSH, DMF, RT, 16 hr  
† Overall yield over two steps  
‡ 1.5 equivalents of the amine was used with no added NEt<sub>3</sub> in preparing the  $\alpha$ -chloroamide.  
§ 4 equivalents of the amine was used with no added NEt<sub>3</sub> in preparing the  $\alpha$ -chloroamide  
¶ Reaction conducted in THF

The  $\alpha$ -chloroamides were synthesized from commercially available 2-chloropropionyl chloride. Earlier experiments were conducted by treatment of the 2-chloropropionyl chloride (in DCM at room temperature) with a solution of the amine (1.5 equivalents) in DCM to give the corresponding  $\alpha$ -chloroamide. Later, an improved procedure was developed involving just 1 equivalent of the amine to effect amide formation and 1 equivalent of triethylamine (added first to the stirred solution of 2-chloropropionyl chloride in DCM) to neutralize the HCl released. A range of simple amines was employed: *p*-toluidine, aniline, ethylamine, *i*-propylamine, benzylamine, allylamine, diphenylamine, dimethylamine, methylamine, 4-fluoroaniline, *n*-butylamine. For studies with chiral amides, both the racemic  $\alpha$ -methylbenzylamine and the enantiopure (S)- $\alpha$ -methylbenzylamine were employed. The treatment of the chiral amine with 2-chloropropionyl chloride resulted in a diastereomeric mixture (1:1) of  $\alpha$ -chloroamides. The crude  $\alpha$ -chloroamides were usually sufficiently pure by <sup>1</sup>H NMR, <sup>13</sup>C NMR and IR spectroscopy to use in subsequent reactions without further purification.

Two methods were employed for the synthesis of  $\alpha$ -thioamides from  $\alpha$ -chloroamides.  $\alpha$ -Chloroamides with *N*-aryl, *N*-benzyl, primary or tertiary amides can be sulfenylated in ethanol by reaction with the freshly prepared sodium salt of the thiol generated using sodium ethoxide. Initially, this reaction was conducted using 2.2 equivalents of sodium ethoxide and 1.1 equivalents of the thiol (Method C). Later experiments indicated that use of just 1.2 equivalents of sodium ethoxide was sufficient (Method A). The *N*-alkyl  $\alpha$ -thioamides were more efficiently obtained using sodium hydride in DMF (method B). The sodium hydride was initially washed with hexane, dried and then suspended in DMF followed by slow addition of the thiol as the deprotonation

proved exothermic. Addition of the appropriate *N*-alkyl  $\alpha$ -chloroamide as a solution in DMF provided the  $\alpha$ -thioamide in essentially quantitative yield. Use of sodium hydride in DMF to form the sulfide **29** derived from 4-nitrobenzenethiol (Method E) similarly proved more efficient than use of sodium ethoxide in ethanol, presumably due to the decreased reactivity of this thiolate.

### Preparation of the $\alpha$ -methylthioamides

Table 2. Synthesis of  $\alpha$ -methylthioamides

| <b>R<sup>1</sup></b>              | <b>R<sup>2</sup></b> | <b>Sulfide</b> | <b>% Yield<sup>†</sup></b> |
|-----------------------------------|----------------------|----------------|----------------------------|
| 4-F-C <sub>6</sub> H <sub>4</sub> | H                    | <b>42</b>      | 95                         |
| Bn                                | H                    | <b>43</b>      | 90                         |
| <i>n</i> -Bu                      | H                    | <b>44</b>      | 73                         |
| <i>i</i> -Pr                      | H                    | <b>45</b>      | 84                         |
| Me                                | H                    | <b>135</b>     | 68                         |
| <i>p</i> -Tol                     | H                    | <b>46</b>      | 80 <sup>‡</sup>            |
| H                                 | H                    | <b>136</b>     | 76 <sup>§</sup>            |
| Et                                | Et                   | <b>137</b>     | 66                         |

<sup>†</sup>Yield calculated over two steps from the  $\alpha$ -methylthio acid

<sup>‡</sup>Amide prepared using DCC coupling reaction

<sup>§</sup>Primary amide synthesised in acetone

To avoid the use of methanethiol, the  $\alpha$ -methylthioamides were prepared from the corresponding acid, which in turn was prepared by methylation of thiolactic acid using dimethyl sulfate in aqueous base as reported by Bernardi *et al*<sup>1</sup>, to provide the acid as a clear oil in 46% yield. Replacement of dimethyl sulfate with methyl iodide led to an improved yield (81%).

The amides were originally prepared using a DCC promoted coupling reaction. It was subsequently found that the route outlined in Table 2 *via* the acid chloride afforded a cleaner product. Preparation of the primary amide using concentrated ammonia proceeded very inefficiently in DCM but was successful in acetone.

### Extended chain $\alpha$ -thioamides

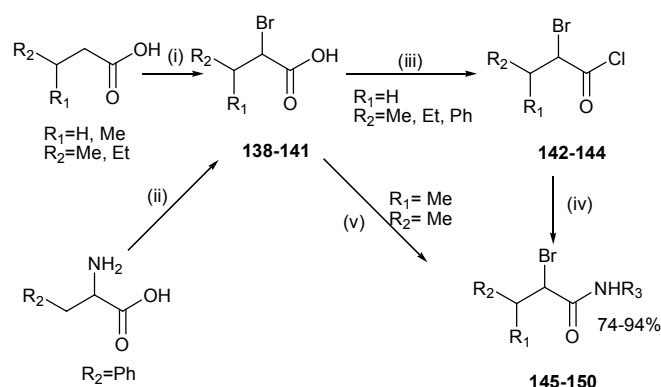

Scheme 1 Reagents and Conditions: (i)  $Br_2$ ,  $PCl_3$ ,  $\Delta$ , 4.5 h (ii)  $HBr$ ,  $NaNO_2$ ,  $0^\circ C$ , 1 h (iii) 1.1 eq.  $(COCl)_2$ , DMF (5 drops), DCM,  $0^\circ C$ -RT, 5h (method F) or 5.5 eq.  $SOCl_2$ ,  $\Delta$ , 1h (method G) (iv) 1.5 eq. amine, RT, 25h or 1.1 eq. amine, 1.1 eq.  $NEt_3$ , RT, 16h (v) 1.1 eq. amine, 1.1 eq. DCC,  $0^\circ C$ -RT, 2h

Table 3 Synthesis of  $\alpha$ -bromoamides

| $R^1$ | $R^2$ | $\alpha$ -Bromo acid | % Yield | Acid chloride           | % Yield | $R^3$                              | Amide      | % Yield |
|-------|-------|----------------------|---------|-------------------------|---------|------------------------------------|------------|---------|
| H     | Me    | <b>138</b>           | 78      | <b>142</b> <sup>†</sup> | 73      | <i>p</i> -Tol                      | <b>145</b> | 91      |
|       |       |                      |         |                         |         | <i>p</i> -Tol                      | <b>146</b> | 85      |
| H     | Et    | <b>139</b>           | 91      | <b>143</b> <sup>†</sup> | Quant   | or<br>(S)-<br>CHCH <sub>3</sub> Ph | <b>147</b> | 94      |
| H     | Ph    | <b>140</b>           | 88      | <b>144</b> <sup>‡</sup> | 83      | <i>p</i> -Tol                      | <b>148</b> | 85      |
| Me    | Me    | <b>141</b>           | 97      | -                       | -       | <i>p</i> -Tol                      | <b>149</b> | 74§     |
| H     | Me    | <b>138</b>           | 78      | -                       | -       | Ph                                 | <b>150</b> | 80§     |

<sup>†</sup>Prepared by Method F

<sup>‡</sup>Prepared by Method G

§ Product contains approx. 10% DCU as estimated by  $^1H$  NMR integration.

The extended chain  $\alpha$ -thioamides were prepared from the analogous carboxylic acids or  $\alpha$ -amino acid as summarised in Table 3.  $\alpha$ -Bromination using bromine and phosphorous trichloride gave the  $\alpha$ -brominated acids **138**, **139** and **141**. As the  $\alpha$ -bromination of  $\beta$ -phenylpropanoic acid proved complex,  $\alpha$ -bromo- $\beta$ -phenylpropanoic acid **140** was prepared instead by treatment of (L)-phenylalanine with hydrogen bromide and sodium nitrite.<sup>2</sup> Although this bromination proceeds with retention of configuration, no effort was made to determine the enantiopurity of the  $\alpha$ -bromo- $\beta$ -phenylpropanoic acid **140**. The acid chlorides of  $\alpha$ -bromobutanoic and pentanoic acids were generated using oxalyl or thionyl chloride. Use of oxalyl chloride in DCM with catalytic DMF (Method E) gave the  $\alpha$ -bromobutanoyl and pentanoyl chlorides **142**, **143** in good yield (73% and quantitative respectively). However, complete removal of DMF was difficult. Alternatively, thionyl chloride (method F) was used to

generate the  $\alpha$ -bromobutanoyl chloride **142** (obtained in 64% yield). The volatility of the  $\alpha$ -bromobutanoyl chloride **142** rendered purification difficult as the work up involved removal of excess thionyl chloride by azeotropic distillation with toluene.

The  $\alpha$ -bromobutanamides and pentanamides **145-147** were then prepared using the corresponding acid chloride and *p*-toluidine or (S)- $\alpha$ -methylbenzylamine (again a 1:1 mixture of diastereomers formed). An alternative method of amide synthesis was employed to form isovalerylamide **149** and the butanamide **150**, involving direct coupling of the  $\alpha$ -bromoacid and the amine using DCC, although at least 9% DCU remains in each product mixture even after chromatography.

Each of the  $\alpha$ -bromoamides were then sulfenylated in ethanol by reaction with the freshly-prepared sodium thiolate as summarised in Table 4.

Table 4. Synthesis of extended chain  $\alpha$ -thioamides

| $  \begin{array}{ccc}  \begin{array}{c} \text{Br} \\   \\ \text{R}_3-\text{CH}-\text{CH}(\text{R}_2)-\text{C}(=\text{O})\text{NHR}_1 \\ \text{76-80} \end{array} & \xrightarrow[\text{EtOH}]{\text{NaSR}_4} & \begin{array}{c} \text{SR}_4 \\   \\ \text{R}_3-\text{CH}-\text{CH}(\text{R}_2)-\text{C}(=\text{O})\text{NHR}_1 \\ \text{82-86} \end{array} \\  & & \text{25-91\%}  \end{array}  $ |                                |                |                |                |        |                     |       |
|--------------------------------------------------------------------------------------------------------------------------------------------------------------------------------------------------------------------------------------------------------------------------------------------------------------------------------------------------------------------------------------------------|--------------------------------|----------------|----------------|----------------|--------|---------------------|-------|
| $\alpha$ -bromoamide                                                                                                                                                                                                                                                                                                                                                                             | R <sup>1</sup>                 | R <sup>2</sup> | R <sup>3</sup> | R <sup>4</sup> | Method | $\alpha$ -thioamide | Yield |
| <b>145</b>                                                                                                                                                                                                                                                                                                                                                                                       | <i>p</i> -Tol                  | H              | Me             | Ph             | A      | <b>47</b>           | 91    |
| <b>146</b>                                                                                                                                                                                                                                                                                                                                                                                       | <i>p</i> -Tol                  | H              | Et             | Ph             | C      | <b>48</b>           | 91    |
| <b>147</b>                                                                                                                                                                                                                                                                                                                                                                                       | (S)-<br>CH(CH <sub>3</sub> )Ph | H              | Et             | Ph             | H      | <b>49</b>           | 80    |
| <b>148</b>                                                                                                                                                                                                                                                                                                                                                                                       | <i>p</i> -Tol                  | H              | Ph             | Ph             | C      | <b>50</b>           | 57    |
| <b>149</b>                                                                                                                                                                                                                                                                                                                                                                                       | <i>p</i> -Tol                  | Me             | Me             | Ph             | C      | <b>151</b>          | 48    |

Method A: 1.2 eq Na, 1.2 eq RSH, Ethanol, RT, 16 hr

Method C: 2.2 eq Na, 1.1 eq RSH, Ethanol, RT, 16 hr

Method H: 1.6 eq Na, 1.1 eq RSH, Ethanol, RT, 16 hr

## Experimental

The 2-bromoacids **138**, **139** & **141**<sup>3</sup> and **140**<sup>2</sup> were prepared using established procedures.

### Synthesis of the $\alpha$ -Haloamides

### ***N*-4'-Methylphenyl-2-chloropropanamide S1**

2-Chloropropionyl chloride (20.00 g, 157 mmol) in dichloromethane (100 ml), was added dropwise over 20 min to a solution of *p*-toluidine (16.59 g, 155 mmol) and triethylamine (15.86 g, 157 mmol) in dichloromethane (300 ml) at 0°C, while stirring under nitrogen. On completion of the addition, the reaction solution was allowed to warm to room temperature. After stirring for 4 hours, distilled water (200 ml) was added and the layers separated. The organic layer was washed with a saturated solution of sodium bicarbonate (2 x 150 ml), water (200 ml) and brine (200 ml), dried and evaporated at reduced pressure to give the amide **S1** as a white solid (29.10 g, 92%) which required no further purification, mp 118-120 °C (Lit.,<sup>4</sup> 108°C);  $\nu_{\max}/\text{cm}^{-1}$  (KBr) 3253 (NH), 3188 (CH), 1664 (CO), 1598, 1514 (NH bend), 1369 (CN stretch);  $\delta_{\text{H}}$  (270 MHz) 1.81 [3H, d, *J* 7, C(3)H<sub>3</sub>], 2.32 (3H, s, ArCH<sub>3</sub>), 4.53 [1H, q, *J* 7, C(2)H], 7.12-7.16 (2H, A of ABq, *J* 8, ArH), 7.40-7.44 (2H, B of ABq, *J* 8, ArH), 8.28 (1H, b s, NH);  $\delta_{\text{C}}$  (67.8 MHz) 20.9 (ArCH<sub>3</sub>), 22.6 [C(3)H<sub>3</sub>], 56.2 [C(2)H], 120.2, 129.6 (aromatic CH), 134.4, 134.8 (quaternary aromatic C), 167.4 (CO).

### ***N*-Benzyl-2-chloropropanamide S2**

This was obtained following the procedure described for **S1** from 2-chloropropionyl chloride (2.50 g, 20 mmol), benzylamine (2.14 g, 20 mmol) and triethylamine (1.98 g, 20 mmol) in dichloromethane (25 ml) to give the amide **S2** as a white solid (3.64 g, 93%) which required no further purification, mp 74-76°C (Lit.,<sup>5</sup> 80-82°C);  $\nu_{\max}/\text{cm}^{-1}$  (KBr) 3289 (NH), 3090 (CH), 3033 (CH), 1650 (CO), 1556 (NH bend), 1497, 1455 (CN stretch);  $\delta_{\text{H}}$  (270 MHz) 1.72 [3H, d, *J* 7, C(3)H<sub>3</sub>], 4.37-4.49 [3H, m, C(2)HCl, NCH<sub>2</sub>], 6.95 (1H, b s, NH), 7.24-7.40 (5H, m, ArH);  $\delta_{\text{C}}$  (67.8 MHz) 22.7 [C(3)H<sub>3</sub>], 43.9 (NCH<sub>2</sub>), 55.9 [C(2)H], 127.7, 127.8, 128.9 (aromatic CH), 137.6 (quaternary aromatic C), 169.5 (CO).

### ***N*-Ethyl-2-chloropropanamide S3<sup>6</sup>**

This was obtained following the procedure described for **S1** from 2-chloropropionyl chloride (2.50 g, 20 mmol), ethylamine (60% soln. in ethanol; 1.50 ml, 20 mmol) and triethylamine (1.98 g, 20 mmol) in dichloromethane (25 ml) to give the amide **S3** as a white solid (2.43 g, 91%) which required no further purification;  $\delta_{\text{H}}$  (270 MHz) 1.18

(3H, t,  $J$  7, CH<sub>2</sub>CH<sub>3</sub>), 1.73 [3H, d,  $J$  7, C(3)H<sub>3</sub>], 3.28-3.42 (2H, m, NCH<sub>2</sub>), 4.41 [1H, q,  $J$  7, C(2)H], 6.67 (1H, b s, NH);  $\delta_{\text{C}}$  (67.8 MHz) 14.5 (CH<sub>2</sub>CH<sub>3</sub>), 22.6 [C(3)H<sub>3</sub>], 34.7 (NCH<sub>2</sub>), 55.8 [C(2)H], 169.3 (CO).

#### ***N*-Isopropyl-2-chloropropanamide S4<sup>7</sup>**

This was obtained following the procedure described for **S1** from 2-chloropropionyl chloride (25.40 g, 0.20 mol), isopropylamine (11.80 g, 0.20 mol) and triethylamine (20.20 g, 0.20 mol) in dichloromethane (250ml) to give the amide **S4** as a white solid (23.09 g, 77%) which required no further purification;  $\delta_{\text{H}}$  (270 MHz) 1.18 [6H, d,  $J$  7, CH(CH<sub>3</sub>)<sub>2</sub>], 1.72 [3H, d,  $J$  7, C(3)H<sub>3</sub>], 3.96-4.14 (1H, m, NCH), 4.38 [1H, q,  $J$  7, C(2)H], 6.44 (1H, b s, NH);  $\delta_{\text{C}}$  (67.8 MHz) 22.5 [CH(CH<sub>3</sub>)<sub>2</sub>], 22.7 [C(3)H<sub>3</sub>], 42.0 (NCH), 56.0 [C(2)H], 168.6 (CO).

#### ***N*-n-Butyl-2-chloropropanamide S5**

This was obtained following the procedure described for **S1** from 2-chloropropionyl chloride (3.52 g, 27.70 mmol), n-butylamine (2.00 g, 27.40 mmol) and triethylamine (2.80 g, 27.70 mmol) in dichloromethane (30 ml) to give the amide **S5** as a white solid (4.20 g, 94%) which required no further purification;  $\nu_{\text{max}}/\text{cm}^{-1}$  (film) 3295 (NH), 3090 (CH), 1661 (CO), 1560 (NH bend), 1447 (CN stretch);  $\delta_{\text{H}}$  (300 MHz) 0.95 [3H, d,  $J$  7.2, C(4')H<sub>3</sub>], 1.28-1.45 [2H, m, C(3')H<sub>2</sub>], 1.46-1.61 [2H, m, C(2')H<sub>2</sub>], 1.74 [3H, d,  $J$  7.1, C(3)H<sub>3</sub>], 3.27 (2H, q,  $J$  5.8, CH<sub>2</sub>NH), 4.44 [1H, q,  $J$  7.1, C(2)H], 6.61 (1H, b s, NH).

#### ***N*-Methyl-2-chloropropanamide S6<sup>7</sup>**

This was obtained following the procedure described for **S1** from 2-chloropropionyl chloride (10.1 ml, 102 mmol), methylamine (12.6 ml, 25% solution, 100 mmol) and triethylamine (14.3 ml, 102 mmol) in dichloromethane (80 ml) to give the amide **S6** as a colourless oil (9.11 g, 74%) which required no further purification;  $\nu_{\text{max}}/\text{cm}^{-1}$  (film) 3306 (NH), 3098 (CH), 1668 (CO), 1539 (NH bend), 1413 (CN stretch);  $\delta_{\text{H}}$  (300 MHz) 1.75 [3H, d,  $J$  7.1, C(3)H<sub>3</sub>], 2.88 (3H, d,  $J$  4.9, CH<sub>3</sub>NH), 4.41 [1H, q,  $J$  7.1, C(2)H], 6.51 (1H, b s, NH);  $\delta_{\text{C}}$  (75.5 MHz) 22.7 [C(3)H<sub>3</sub>], 26.7 (NCH<sub>3</sub>), 55.8 [C(2)H], 170.4 (CO);  $m/z$  121 (M<sup>+</sup>, 6%), 86 (96, M-Cl<sup>35</sup>), 63 (52, [CH<sub>3</sub>CHCl]<sup>+</sup>), 58 (100, [CONHCH<sub>3</sub>]<sup>+</sup>).

### ***N*-2'-Propenyl-2-chloropropenamide **S7**<sup>7</sup>**

This was obtained following the procedure described for **S1** from 2-chloropropionyl chloride (3.00 g, 23.62 mmol), 2'-propenylamine (1.28 g, 22.5 mmol) and triethylamine (2.39 g, 23.62 mmol) in dichloromethane (28 ml) to give the amide **S7** as a clear oil (3.02 g, 91%) which required no further purification;  $\delta_{\text{H}}$  (60 MHz) 1.70 [3H, d,  $J$  8, C(3) $H_3$ ], 3.77-4.10 (2H, m, NCH<sub>2</sub>), 4.48 [1H, q,  $J$  8, C(2) $H$ ], 5.00-5.43 (2H, m, =CH<sub>2</sub>), 5.57-6.25 (1H, m, CH=), 7.08 (1H, b s, NH).

### ***N*-3'-Phenylpropenyl-2-chloropropanamide **S8****

A solution of 2-chloropropanoyl chloride (1.03 g, 8.1 mmol) in DCM (30 ml) was stirred at room temperature. Cinnamyl amine (1.62 g, 12.2 mmol) was added slowly. Stirring was continued for 16 h then water (30 ml) was added, the layers were separated, the aqueous layer was extracted with DCM (2 x 10 ml) and the combined organic layers washed with saturated sodium bicarbonate (2 x 20 ml), water (2 x 20 ml) and brine (2 x 20 ml), dried and concentrated to give **S8** as a pale yellow solid (1.32 g, 73 %) which was used without further purification; mp 65-66 °C;  $\nu_{\text{max}}/\text{cm}^{-1}$  (KBr) 3054 (br NH), 1675 (CO amide);  $\delta_{\text{H}}$  (60 MHz) 1.75 [3 H, d,  $J$  7, C(3) $H_3$ ], 4.07 [(2 H, m, C(3') $H_2$ ), 4.43 [1 H, q,  $J$  7, C(2) $H$ ], 6.07-6.50 (2 H, m, CH=CH), 7.02-7.51 (5 H, m, ArH).

### ***N*-4'-Fluorophenyl-2-chloropropanamide **S9****

The title compound was prepared following the procedure described for **S1** from 4-fluoroaniline (6.66 g, 60.00 mmol), 2-chloropropionyl chloride (7.75 g, 61.00 mmol) and triethylamine (6.16 g, 61.00 mmol) in DCM (140 ml) to give the amide **S9** as a pink solid (11.98 g, 99%) which required no further purification, mp 79-81°C (Lit.,<sup>8</sup> 106-108°C);  $\nu_{\text{max}}/\text{cm}^{-1}$  (KBr) 3254 (NH), 1661 (CO), 1542 (NH bend), 1509, 1374 (CN stretch);  $\delta_{\text{H}}$  (300 MHz) 1.83 [3H, d,  $J$  7.1, C(3) $H_3$ ], 4.53 [1H, q,  $J$  7.1, C(2) $H$ ], 7.06 {2H, overlapping dd [appears as a triplet],  $J$  7.8, 7.8, C(3') $H$ }, 7.48-7.56 [2H, m, C(2') $H$ ], 8.41 (1H, b s, NH);  $\delta_{\text{C}}$  (75.5 MHz) 22.8 [C(3) $H_3$ ], 56.3 [C(2) $H$ ], 116.3 [d,  $^2J_{\text{CF}}$  24, ArC(3')], 122.5 [ArC(2')], 133.4 [ArC(1')], 160.3 [d,  $^1J_{\text{CF}}$  245, ArC(4')], 168.1 (CO).

### ***N*-Phenyl-2-chloropropanamide S10**

This was synthesized using the procedure described for **S1** from 2-chloropropionyl chloride (7.00 ml, 0.07 mol), aniline (6.41 ml, 0.07 mol) and triethylamine (9.86 ml, 0.07 mol) in dichloromethane (150 ml) to give the amide **S10** (11.85 g, 93%) as a yellow solid which was carried forward without further purification, mp 83-84°C (Lit.,<sup>9</sup> 93°C);  $\nu_{\max}/\text{cm}^{-1}$  (KBr) 3260 (NH), 3135 (CH), 1669 (CO), 1599, 1544 (NH bend), 1371 (CN stretch);  $\delta_{\text{H}}$  (300 MHz) 1.83 [3H, d,  $J$  7.1, C(3) $H_3$ ], 4.55 [1H, q,  $J$  7.1, C(2) $H$ ], 7.12-7.59 (5H, m, Ar $H$ ), 8.28 (1H, b s, NH).

### **2-Chloropropanamide S11**

This was obtained following the procedure described for **S1** from 2-chloropropionyl chloride (6.88 g, 55 mmol) and aqueous ammonia (35% soln; 10mls, 182 mmol) in dichloromethane to give the amide **S11** as a white solid (17.14g, 88%) which required no further purification, mp 83-84°C (Lit.,<sup>10</sup> 75-77°C);  $\nu_{\max}/\text{cm}^{-1}$  (KBr) 3379 (NH), 3199 (NH), 2998 (CH), 1664 (CO), 1412 (CN stretch);  $\delta_{\text{H}}$  (300 MHz) 1.76 [3H, d,  $J$  7.1, C(3) $H_3$ ], 4.44 [1H, q,  $J$  7.1, C(2) $H$ ], 5.60 (1H, b s, NH), 6.53 (1H, b s, NH);  $\delta_{\text{C}}$  (75.5 MHz) 22.7 [C(3) $H_3$ ], 55.3 [C(2) $H$ ], 173.0 (CO).

### ***N,N*-Diphenyl-2-chloropropanamide S12**

This was obtained following the procedure described for **S1** from 2-chloropropionyl chloride (2.50 g, 20 mmol), diphenylamine (3.38 g, 20 mmol) and triethylamine (1.98 g, 20 mmol) in dichloromethane (250ml) to give the amide **S12** as a grey solid (4.48 g, 92%) which required no further purification;  $\nu_{\max}/\text{cm}^{-1}$  (film) 1678 (CO);  $\delta_{\text{H}}$  (60MHz) 1.67 [3H, d,  $J$  7, C(3) $H_3$ ], 4.52 [1H, q,  $J$  7, C(2) $H$ ], 7.23-7.40 (10H, m, Ar $H$ ).

### ***N,N*-Dimethyl-2-chloropropanamide S13**

This was obtained following the procedure described for **S1** from 2-chloropropionyl chloride (2.50 g, 20 mmol), dimethylamine (2.50 g, 20 mmol) and triethylamine (1.98 g, 20 mmol) in dichloromethane (25 ml) to give the amide **S13** as a yellow oil (1.96 g, 72%) which required no further purification;  $\nu_{\max}/\text{cm}^{-1}$  (film) 1659 (CO);  $\delta_{\text{H}}$  (60MHz) 1.58 [3H, d,  $J$  7, C(3) $H_3$ ], 2.98 [3H, s, one of N(CH<sub>3</sub>)<sub>2</sub>], 3.10 [3H, s, one of N(CH<sub>3</sub>)<sub>2</sub>], 4.63 [1H, q,  $J$  7, C(2) $H$ ].

#### **(±)-*N*-1'-Phenylethyl-2-chloropropanamide S14**

This was prepared following the procedure described for amide **S1** using 2-chloropropanoyl chloride (3.00 g, 23.6 mmol), (±)-1-phenylethylamine (4.6 ml, 35.4 mmol), DCM (30 ml) to give (±)-*N*-1'-phenylethyl-2-chloropropanamide **S14** (3.56 g, 72%, an equimolar mixture of two diastereomers) as a white, crystalline solid, which was used without further purification;  $\nu_{\max}/\text{cm}^{-1}$  (KBr) 1656 (CO);  $\delta_{\text{H}}$  (60 MHz) 1.55 [3H, d,  $J$  7, C(2') $H_3$ ], 1.71, 1.73 [3H, 2 x d,  $J$  7, 7, C(3) $H_3$ ], 4.39, 4.41 [1H, 2 x q,  $J$  7, 7, C(2) $H$ ], 4.83-5.38 (1H, dq,  $J$  7, NCH), 6.87 (1H, br s, NH), 7.34 (5H, s, aromatic CH).

#### **(S)-*N*-1'-Phenylethyl-2-chloropropanamide S15**

This was prepared following the procedure described for amide **S1** using 2-chloropropanoyl chloride (3.00 g, 23.8 mmol), (S)-(-)-1-phenylethyl amine (4.6 ml, 35.7 mmol) in DCM (60 ml) gave (2R/S, 1'S)-*N*-1'-phenylethyl-2-chloropropanamide **S15** (3.65 g, 73 % as an equimolar mixture of diastereomers) as a white, crystalline solid which was used without further purification (spectral data as observed for amide **S14**).

### **Synthesis of the $\alpha$ -thioamides**

#### ***N*-4'-Methylphenyl-2-(phenylthio)propanamide 1**

##### **Method A**

Thiophenol (5.00 ml, 48.6 mmol) was added to a solution of freshly prepared sodium ethoxide [made from sodium (1.12 g, 48.6 mmol) in dry ethanol (90 ml) at 0°C] while stirring under nitrogen. The resulting solution was stirred for 20 minutes when *N*-4'-methylphenyl-2-chloropropanamide **S1** (8.00 g, 40.5 mmol) was added gradually over 15 minutes. The reaction solution was typically seen to become cloudy 30 minutes after the final addition of the  $\alpha$ -chloroamide. Following stirring for 16 hours, the reaction was quenched by addition of water (100 ml) and DCM (70 ml). The phases were separated and the aqueous layer was extracted with DCM (2 x 50 ml). The combined organic layers were washed with NaOH (1M, 2 x 100 ml), water (200 ml) and brine (200 ml), dried and concentrated at reduced pressure to give **1** as an off-

white solid. Purification by column chromatography using ethyl acetate-hexane (40:60) as eluent gave the sulfide **1** (10.17 g, 93%) as a white, crystalline solid, mp 112-113 °C; (Found C, 70.87; H, 6.51; N, 5.33; S, 11.74. C<sub>16</sub>H<sub>17</sub>NOS requires C, 70.81; H, 6.31; N, 5.16; S, 11.82%);  $\nu_{\max}/\text{cm}^{-1}$  (KBr) 3292 (br, NH), 1661 (CO), 1537, 1514, 824;  $\delta_{\text{H}}$  (270 MHz) 1.63 [3H, d,  $J$  7, C(3)H<sub>3</sub>], 2.29 (3H, s, ArCH<sub>3</sub>), 3.90 [1 H, q,  $J$  7, C(2)H], 7.04-7.44 (9H, m, ArH), 8.40 (1H, br s, NH);  $\delta_{\text{C}}$  (67.8 MHz) 19.7 [C(3)H<sub>3</sub>], 22.1 (ArCH<sub>3</sub>), 49.1 [C(2)H], 121.2, 128.9, 130.6, 131.1, 132.0 (aromatic CH), 134.6, 135.4, 136.1 (quaternary aromatic C), 171.1 (CO);  $m/z$  271 (M<sup>+</sup>, 18%), 163 (11, M<sup>+</sup> - PhS), 137 (21, [PhS=CHCH<sub>3</sub>]<sup>+</sup>), 110 (100).

### ***N*-Benzyl-2-(phenylthio)propanamide **9****

The title compound was prepared using the procedure (Method A) described for **1** using *N*-benzyl-2-chloropropanamide **S2** (8.00 g, 40.5 mmol), thiophenol (5.00 ml, 48.6 mmol) and sodium (1.12 g, 48.6 mmol) in dry ethanol (90 ml). The reaction solution was stirred for 16 hours before work-up as described for **1** to give **9** (9.95 g, 91%) as a colourless solid which was used without further purification, mp 62-63 °C; (Found C, 70.42; H, 6.35; N, 5.01; S, 12.15. C<sub>16</sub>H<sub>17</sub>NOS requires C, 70.81; H, 6.31; N, 5.16; S, 11.82%);  $\nu_{\max}/\text{cm}^{-1}$  3283 (br NH), 1653 (CO);  $\delta_{\text{H}}$  (300 MHz) 1.58 [3H, d,  $J$  7.3, C(3)H<sub>3</sub>], 3.88 [1H, q,  $J$  7.3, C(2)H], 4.38 (1H, dd, A of ABX,  $J_{\text{AB}}$  14.9,  $J_{\text{AX}}$  5.9, NHCH<sub>2</sub>), 4.40 (1H, dd, B of ABX,  $J_{\text{AB}}$  14.9,  $J_{\text{BX}}$  5.5, NHCH<sub>2</sub>), 6.91 (1H, b s, NH), 7.01-7.13 (2H, m, ArH), 7.16-7.39 (8H, m, ArH);  $\delta_{\text{C}}$  (75.5 MHz) 18.3 [C(3)H<sub>3</sub>], 43.7 (NCH<sub>2</sub>), 46.9 [C(2)H], 127.0, 127.2, 127.4, 128.6, 129.2, 130.2 (aromatic CH), 133.9, 137.8 (quaternary aromatic C), 171.7 (CO).

### ***N*-Ethyl-2-(phenylthio)propanamide **10****

#### **Method B**

Sodium hydride (1.55 g of 60% dispersion in mineral oil, 38.90 mmol) was placed in a 3-necked round bottomed flask under a flow of nitrogen. Following washing with hexane (3 x 20 ml), dry DMF (150 ml) was added *via* cannula and the resulting suspension stirred for 10 minutes. The reaction mixture was cooled to 0°C and thiophenol (4.19 ml, 40.70 mmol) was added slowly *via* syringe. After stirring for 20 minutes, a solution of *N*-ethyl-2-chloropropanamide **S3** (5.00 g, 37.00 mmol) in DMF

(5 ml) was added. On completion of the addition, the ice bath was removed and the reaction mixture stirred at room temperature for 4 hours when water (200 ml) and DCM (150 ml) were added and the phases separated. The aqueous layer was extracted with DCM (2 x 100 ml) and the combined organic layers washed with NaOH (1M, 200 ml), water (2 x 200 ml) and brine (100 ml), dried and concentrated at reduced pressure to give the crude sulfide **10**.  $^1\text{H}$  NMR analysis (60 MHz) of the crude product showed it to contain up to 20% DMF. Following chromatography on silica gel using ethyl acetate-hexane as eluent (gradient elution 2-20% ethyl acetate), the sulfide **10** was isolated (7.40 g, 96%) as a colourless solid, mp 49-51 °C; (Found C, 63.07; H, 7.35; N, 6.79.  $\text{C}_{11}\text{H}_{15}\text{NOS}$  requires C, 63.12; H, 7.22; N, 6.69%);  $\nu_{\text{max}}/\text{cm}^{-1}$  (KBr) 3270 (br NH), 1637(CO), 1560 (C=C);  $\delta_{\text{H}}$  (270 MHz) 1.06 (3H, t,  $J$  7,  $\text{CH}_2\text{CH}_3$ ), 1.54 [3H, d,  $J$  7,  $\text{C}(3)\text{H}_3$ ], 3.15-3.37 (2H, m,  $\text{NCH}_2$ ), 3.79 [1H, q,  $J$  7,  $\text{C}(2)\text{H}$ ], 6.61 (1H, b s, NH), 7.19-7.40 (5H, m, ArH);  $\delta_{\text{C}}$  (67.8 MHz) 14.6 ( $\text{NCH}_2\text{CH}_3$ ), 18.3 [ $\text{C}(3)\text{H}_3$ ], 34.6 ( $\text{NCH}_2$ ), 46.7 [ $\text{C}(2)\text{H}$ ], 127.0, 129.1, 129.4 (aromatic CH), 134.1 (quaternary aromatic C), 171.6 (CO).

### ***N*-Isopropyl-2-(phenylthio)propanamide 11**

The title compound was prepared according to the procedure (Method B) described for **10** using a solution of *N*-*i*-propyl-2-chloro-propanamide **S4** (5.00 g, 33.45 mmol) in DMF (15 ml) added to a solution of sodium hydride (1.41 g of 60% dispersion in mineral oil, 35.12 mmol) and thiophenol (3.80 ml, 36.80 mmol) in DMF (150 ml). After chromatography on silica gel using ethyl acetate-hexane (gradient elution 5-30% ethyl acetate) as eluent, the sulfide **11** was isolated (6.89 g, 93%) as a colourless solid, mp 42-44 °C; (Found C, 64.70; H, 7.92; N, 6.30; S, 14.03.  $\text{C}_{12}\text{H}_{17}\text{NOS}$  requires C, 64.54; H, 7.67; N, 6.27; S, 14.36%);  $\nu_{\text{max}}/\text{cm}^{-1}$  (KBr) 3289 (br NH), 1662, 1638 (CO);  $\delta_{\text{H}}$  (270 MHz) 0.99 [3H, d,  $J$  7, one of  $\text{CH}(\text{CH}_3)_2$ ], 1.09 [3H, d,  $J$  7, one of  $\text{CH}(\text{CH}_3)_2$ ], 1.56 [3H, d,  $J$  7,  $\text{C}(3)\text{H}_3$ ], 3.78 [1H, q,  $J$  7,  $\text{C}(2)\text{H}$ ], 3.91-4.06 (1H, m, NCH), 6.37 (1H, b s, NH), 7.18-7.37 (5H, m, ArH);  $\delta_{\text{C}}$  (67.8 MHz) 18.2 [ $\text{C}(3)\text{H}_3$ ], 21.9, 22.3 [ $\text{CH}(\text{CH}_3)_2$ ], 41.5 [ $\text{CH}(\text{CH}_3)_2$ ], 47.0 [ $\text{C}(2)\text{H}$ ], 127.2, 129.1, 130.3 (aromatic CH), 134.1 (quaternary aromatic C), 170.71 (CO).

### ***N*-*n*-Butyl-2-(phenylthio)propanamide 12**

The title compound was prepared according to the procedure (Method B) described for **10** using a solution of *N*-*n*-butyl-2-chloro-propanamide **S5** (3.22 g, 19.70 mmol) in DMF (5 ml) added to a solution of sodium hydride (0.83 g of 60% dispersion in mineral oil, 20.69 mmol) and thiophenol (2.38 g, 21.67 mmol) in DMF (97 ml). After chromatography on silica gel using ethyl acetate-hexane (gradient elution 5-30% ethyl acetate) as eluent, the sulfide **12** was isolated (3.41 g, 94%) as a clear oil;  $\nu_{\max}/\text{cm}^{-1}$  (film) 3293 (NH), 3064 (CH), 1647 (CO), 1603 (NH bend), 1495, 1452 (CN stretch);  $\delta_{\text{H}}$  (270 MHz) 0.85 [3H, t,  $J$  7, C(4')H<sub>3</sub>], 1.11-1.28 [2H, m, C(3')H<sub>2</sub>], 1.30-1.45 [2H, m, C(2')H<sub>2</sub>], 1.55 [3H, d,  $J$  7, C(3)H<sub>3</sub>], 3.09-3.31 (2H, m, NCH<sub>2</sub>), 3.82 [1H, q,  $J$  7, C(2)H], 6.62 (1H, b s, NH), 7.16-7.36 (5H, m, ArH);  $\delta_{\text{C}}$  (67.8 MHz) 14.2 [CH<sub>3</sub>, C(4')H<sub>3</sub>], 19.0 [CH<sub>3</sub>, C(3)H<sub>3</sub>], 20.5 [CH<sub>2</sub>, C(3')H<sub>2</sub>], 32.0 [CH<sub>2</sub>, C(2')H<sub>2</sub>], 36.8 (CH<sub>2</sub>, CH<sub>2</sub>S), 39.8 (CH<sub>2</sub>, CH<sub>2</sub>N), 44.8 [CH, C(2)H], 127.7 (CH, aromatic CH), 129.1 (CH, aromatic CH), 129.2 (CH, aromatic CH), 137.8 (C, quaternary aromatic C), 172.5 (C, CO).

#### ***N*-Methyl-2-(phenylthio)propanamide 13**

The title compound was prepared according to the procedure (Method B) described for **10** using a solution of *N*-methyl-2-chloro-propanamide **S6** (5.00 g, 41 mmol) in DMF (15 ml) added to a solution of sodium hydride (1.04 g of 60% dispersion in mineral oil, 43 mmol) and thiophenol (4.7 ml, 45 mmol) in DMF (150 ml). After chromatography on silica gel using ethyl acetate-hexane (25:75) as eluent, the sulfide **13** was isolated (4.56 g, 57%) as a white solid; mp 48-49 °C; (Found C, 61.83; H, 6.99; N, 6.98; S, 16.77; C<sub>10</sub>H<sub>13</sub>NOS requires C, 61.50; H, 6.71; N, 7.17; S, 16.42%);  $\nu_{\max}/\text{cm}^{-1}$  (KBr) 3289 (NH), 1650 (CO), 1560 (C=C);  $\delta_{\text{H}}$  (270 MHz) 1.54 [3H, d,  $J$  7, C(3)H<sub>3</sub>], 2.78 (3H, d,  $J$  4.9, NCH<sub>3</sub>), 3.73-3.85 [1H, q,  $J$  7, C(2)H], 6.72 (1H, b s, NH), 7.13-7.40 (5H, m, ArH);  $\delta_{\text{C}}$  (67.8 MHz) 18.8 [C(3)H<sub>3</sub>], 27.0 (NCH<sub>3</sub>), 47.3 [C(2)H], 127.5, 129.6, 130.4 (aromatic CH), 134.5 (quaternary aromatic C), 172.9 (CO);  $m/z$  195 (M<sup>+</sup>, 68%), 137 (100, [CH<sub>3</sub>CHSPh]<sup>+</sup>), 109 (71, [PhS]<sup>+</sup>), 86 (17, M-[PhS]<sup>+</sup>), 58 (87, [CONHCH<sub>3</sub>]<sup>+</sup>).

#### ***N*-2'-Propenyl-2-(phenylthio)propanamide 14**

The title compound was prepared according to the procedure (Method B) described for **10** using a solution of *N*-2'-propenyl-2-chloropropanamide **S7** (3.00 g, 20.34

mmol) in DMF (5 ml) added to a solution of sodium hydride (0.86 g of 60% dispersion in mineral oil, 21.36 mmol) and thiophenol (2.30 ml, 22.37 mmol) in DMF (90 ml). After chromatography on silica gel using ethyl acetate-hexane (gradient elution 5-30% ethyl acetate) as eluent, the sulfide **14** was isolated (4.10 g, 91%) as a colourless solid, mp 64-66 °C; (Found C, 64.95; H, 7.07; N, 6.46; S, 14.71. C<sub>12</sub>H<sub>15</sub>NOS requires C, 65.12; H, 6.83; N, 6.33; S, 14.49%);  $\nu_{\max}/\text{cm}^{-1}$  (KBr) 3253 (br NH), 1653, 1638 (CO);  $\delta_{\text{H}}$  (270 MHz) 1.58 [3 H, d,  $J$  7, C(3)H<sub>3</sub>], 3.83 [3 H, m, C(2)H and CH<sub>2</sub>CH=], 4.84-5.24 (2 H, m, CH<sub>2</sub>=), 5.52-5.92 (1 H, m, CH=CH<sub>2</sub>), 6.75 (1 H, br s, NH), 7.19- 7.40 (5 H, m, ArH);  $\delta_{\text{C}}$  (67.8 MHz) 18.4 [C(3)H<sub>3</sub>], 42.0 (CH<sub>2</sub>CH=), 47.00 [C(2)H], 116.3 (CH=CH<sub>2</sub>), 127.3, 129.2, 130.3 (aromatic CH), 133.8 (CH=CH<sub>2</sub>), 134.0 (quaternary C), 171.7 (CO).

### ***N*-3'-Phenylpropenyl-2-(phenylthio)propanamide **15****

#### Method C

Sodium thiophenoxide was freshly prepared by addition over 30 min of thiophenol (0.6 ml, 5.6 mmol) to a freshly prepared sodium ethoxide solution [made from sodium (0.26 g, 11.1 mmol) in dry ethanol (25 ml)] while stirring under nitrogen. *N*-3'-Phenylpropenyl-2-chloropropanamide **S8** (1.14 g, 5.1 mmol) was added slowly and stirring was continued at room temperature under nitrogen for 24 h. The ethanol was then evaporated at reduced pressure and the residue partitioned between DCM (20 ml) and water (15 ml). The organic layer was washed with NaOH (5M, 2 x 10 ml), water (2 x 10 ml), dried and concentrated under reduced pressure. Trituration using cold hexane gave the sulfide **15** (1.07 g, 71 %) as a pink, crystalline solid, mp 69-70 °C; (Found C, 72.43; H, 6.33; N, 4.68; S, 10.55. C<sub>18</sub>H<sub>19</sub>NOS requires C, 72.69; H, 6.44; N, 4.71; S, 10.78%);  $\nu_{\max}/\text{cm}^{-1}$  (KBr) 3269 (br NH), 1670, 1646 (CO);  $\delta_{\text{H}}$  (270 MHz) 1.58 [3H, d,  $J$  7, C(3)H<sub>3</sub>], 3.87 [1H, q,  $J$  7, C(2)H], 3.97-4.10 [2H, m, C(1')H<sub>2</sub>], 5.97-6.07 [1H, dt,  $J$  16, 6, C(3')H], 6.37 [1H, d,  $J$  16, C(2')H], 6.78 (1H, br s, NH), 7.19-7.36 (10H, m, ArH);  $\delta_{\text{C}}$  (67.8 MHz) 18.3 [C(3)H<sub>3</sub>], 41.6 [C(1')H<sub>2</sub>], 47.0 [C(2)H], 125.1, 126.4, 127.3, 127.9, 128.5, 129.0, 129.7, 132.1 (aromatic CH and CH=CH), 134.0, 136.5 (quaternary aromatic C), 171.7 (CO);  $m/z$  297 (M<sup>+</sup>, 3 %), 188 (100, M<sup>+</sup> - PhS), 137 (32, [PhSCHCH<sub>3</sub>]<sup>+</sup>), 117 (33).

### ***N*-4'-Fluorophenyl-2-(phenylthio)propanamide 16**

The title compound was prepared using the procedure (Method A) described for **1** using *N*-4'-fluorophenyl-2-chloropropanamide **S9** (5.00 g, 24.80 mmol), thiophenol (3.85 ml, 37.20 mmol) and sodium (0.86 g, 37.20 mmol) in dry ethanol (70 ml). The reaction solution was stirred for 16 hours before work-up as described for **1** to give the sulfide **16** (6.63 g, 97%) as a pink solid which was used without further purification, mp 90-91 °C; (Found C, 65.76; H, 4.95; N, 5.04. C<sub>15</sub>H<sub>14</sub>NFOS requires C, 65.43; H, 5.13; N, 5.09%);  $\nu_{\max}/\text{cm}^{-1}$  (KBr) 3500-2800 (NH), 1655 (CO), 1552, 1509, 1213, 834;  $\delta_{\text{H}}$  (270 MHz) 1.60 [3H, d, *J* 7, C(3)*H*<sub>3</sub>], 3.88 [1H, q, *J* 7, C(2)*H*], 6.90 [2H, overlapping dd, *J* 8, 8, C(3')*H*], 7.03-7.42 (7H, m, *ArH*), 8.45 (1H, b s, *NH*);  $\delta_{\text{C}}$  (67.8 MHz) 17.9 [C(3)*H*<sub>3</sub>], 47.7 [C(2)*H*], 115.5 [d, <sup>2</sup>*J*<sub>CF</sub> 22, *ArC*(3')], 121.8 [d, <sup>3</sup>*J*<sub>CF</sub> 9, *ArC*(2')], 128.0, 129.3, 131.1 (aromatic CH), 133.1, 133.5 (quaternary aromatic C), 159.5 [d, <sup>1</sup>*J*<sub>CF</sub> 244, *ArC*(4')], 170.1 (CO); *m/z* 275 (M<sup>+</sup>, 16), 137 (100, M<sup>+</sup>-CONHAr), 109 (42, [SPh]<sup>+</sup>).

### **2-(Phenylthio)propanamide 17**

The title compound was prepared using the procedure (Method A) described for **1** using 2-chloropropanamide **S10** (4.00 g, 37.20 mmol), thiophenol (4.60 ml, 44.64 mmol) and sodium (1.03 g, 44.64 mmol) in dry ethanol (80 ml). The reaction solution was stirred for 16 hours before work-up as described for **1** to give **17**. Purification of the crude sulfide by chromatography using ethyl acetate-hexane (20:80) as eluent gave **17** (4.41 g, 66%) as a white, crystalline solid; mp 121-122 °C; (Found C, 60.00; H, 6.00; N, 8.11; S, 17.65. C<sub>9</sub>H<sub>11</sub>NOS requires C, 59.64; H, 6.12; N, 7.73; S, 17.69%);  $\nu_{\max}/\text{cm}^{-1}$  (KBr) 3375 (br NH), 1652 (CO);  $\delta_{\text{H}}$  (270 MHz) 1.50 [3 H, d, *J* 8, C(3)*H*<sub>3</sub>], 3.75 [1 H, q, *J* 8, C(2)*H*], 6.03 (1 H, br s, *NH*), 6.28 (1 H, br s, *NH*), 7.23-7.41 (5 H, m, *ArH*);  $\delta_{\text{C}}$  (67.8 MHz) 18.3 [C(3)*H*<sub>3</sub>], 47.0 [C(2)*H*], 128.9, 129.5, 131.4 (aromatic CH), 134.3 (quaternary aromatic C), 174.8 (CO); *m/z* 181 (M<sup>+</sup>, 37 %), 137 (100, [PhSCHCH<sub>3</sub>]<sup>+</sup>), 109 (37, [PhS]<sup>+</sup>), 77 (13).

### ***N,N*-Diphenyl-2-phenylthiopropylamide 18**

Sodium (2.48 g, 21.2 mmol) was added to a solution of thiophenol (4.3 ml, 42.4 mmol) in THF (80 ml) followed by heating at 70 °C for 2 h to generate sodium thiophenoxide (21.18 mmol). *N,N*-Diphenyl-2-chloropropylamide **S12** (5 g, 19.25

mmol) was added to the cooled solution with stirring and the reaction was complete after 17 h (by TLC analysis). The THF was evaporated under reduced pressure and DCM (80 ml) was added. The organic phase was washed with saturated sodium bicarbonate (2 x 30 ml) and brine (3 x 30 ml), dried, and concentrated to give the sulfide in quantitative yield (6.4 g). Recrystallisation from dry ethanol-hexane (10:90) gave the sulfide **18** (3.26 g, 51 %) as a white, crystalline solid, mp 85-87 °C; (Found C, 75.38; H, 5.79; N, 4.03; S, 9.67. C<sub>21</sub>H<sub>19</sub>NOS requires C, 75.64; H, 5.74; N, 4.20; S, 9.62%);  $\nu_{\max}/\text{cm}^{-1}$  (KBr) 1671, 1591 (CO);  $\delta_{\text{H}}$  (270 MHz) 1.50 [3 H, d, *J* 7, C(3)H<sub>3</sub>], 3.93 [1 H, q, *J* 7, C(2)H], 7.10-7.37 (15 H, m, ArH);  $\delta_{\text{C}}$  (67.8 MHz) 18.2 [C(3)H<sub>3</sub>], 44.6 [C(2)H], 126.4-133.3 (signals could not be distinguished except for signals at 127.8 and 129.2, aromatic CH), 134.0 (aromatic CH), 133.3, 142.6 (quaternary aromatic C), 172.3 (CO); *m/z* 333 (M<sup>+</sup>, 70%), 224 (8, M<sup>+</sup> - PhSH), 196 (20), 169 (100), 137 (45, [PhSCHCH<sub>3</sub>]<sup>+</sup>).

#### ***N,N*-Dimethyl-2-(phenylthio)propanamide **19****

The title compound was prepared using the procedure (Method A) described for **1** using *N,N*-dimethyl-2-chloropropanamide **S13** (5.00 g, 36.90 mmol), thiophenol (4.56 ml, 44.28 mmol) and sodium (1.02 g, 44.28 mmol) in dry ethanol (85 ml). The reaction solution was stirred for 16 hours before work-up as described for **1** to give the crude product which was purified by chromatography on silica gel using ethyl acetate-hexane (20:80) as eluent to give **19** (6.49 g, 84%) as a pale yellow oil;  $\nu_{\max}/\text{cm}^{-1}$  (film) 1648 (CO);  $\delta_{\text{H}}$  (270 MHz) 1.46 [3H, d, *J* 7, C(3)H<sub>3</sub>], 2.95, 3.00 [2 x 3H, 2 x s, N(CH<sub>3</sub>)<sub>2</sub>], 4.02 [1H, q, *J* 7, C(2)H], 7.27-7.48 (5H, m, ArH);  $\delta_{\text{C}}$  (67.8 MHz) 18.7 [C(3)H<sub>3</sub>], 36.3, 37.4 (NCH<sub>3</sub>), 42.7 [C(2)H], 128.2, 129.4 (aromatic CH), 133.8 (quaternary aromatic C), 134.5 (aromatic CH), 171.3 (CO); *m/z* 209.08658 (M<sup>+</sup>, C<sub>11</sub>H<sub>15</sub>NOS requires 209.08744209), (209, 84 %), 137 (97, M<sup>+</sup> - CON(CH<sub>3</sub>)<sub>2</sub>), 109 (56, [PhS]<sup>+</sup>), 100 (50, M<sup>+</sup> - PhS).

#### **(2R<sup>\*</sup>, 1'R<sup>\*</sup>)-*N*-1'-Phenylethyl-2-(phenylthio)propanamide and (2R<sup>\*</sup>, 1'S<sup>\*</sup>)-*N*-1'-phenylethyl-2-(phenylthio)propanamide **20****

This was prepared following the procedure (Method C) described for sulfide **15** using (1'R/S)-*N*-1'-phenylethyl-2-chloropropanamide **S14** (3.00 g, 14.2 mmol), thiophenol (1.6 ml, 15.6 mmol), sodium (0.72 g, 31.3mmol) and dry ethanol (60 ml) to give the

crude product {3.56 g, 88% as 1:2 [(2R\*, 1'R\*): (2R\*, 1'S\*)] mixture of diastereomers}. Purification by radial chromatography using ethyl acetate-hexane (10:90) gave 2 diastereomers; (2R\*, 1'R\*)-N-1'-Phenylethyl-2-(phenylthio)propanamide **20-(2R\*,1'R\*)** (0.63 g, 16 %) as a white, crystalline solid [Rf 0.35 using ether-hexane (50:50) as eluent], mp 97-98 °C; (Found C, 71.78; H, 6.66; N, 4.88. C<sub>17</sub>H<sub>19</sub>NOS requires C, 71.54; H, 6.71; N, 4.91%);  $\nu_{\max}/\text{cm}^{-1}$  (KBr) 3276 (br NH), 1643 (CO);  $\delta_{\text{H}}$  (270 MHz) 1.33 [3H, d, *J* 7, C(2')H<sub>3</sub>], 1.56 [3H, d, *J* 7, C(3)H<sub>3</sub>], 3.85 [1H, q, *J* 7, C(2)H], 4.98-5.11 (1H, dq, *J* 7, 8, NCH), 6.85 (1 H, br s, NH), 7.15-7.40 (10 H, m, ArH);  $\delta_{\text{C}}$  (67.8 MHz) 18.1 [C(3)H<sub>3</sub>], 21.4 [C(2')H<sub>3</sub>], 46.9 [C(2)H], 48.8 (NCH), 126.0, 127.2, 127.3, 128.6, 129.1, 130.3 (aromatic CH), 133.8, 142.8 (quaternary aromatic C), 170.7 (CO); *m/z* 285 (M<sup>+</sup>, 18 %), 176 (92, M<sup>+</sup> - PhS), 137 (100, [PhSCHCH<sub>3</sub>]<sup>+</sup>), 105 (100), 91 (12), 77 (32), and (2R\*, 1'S\*)-N-1'-phenylethyl-2-(phenylthio)propanamide **20-(2R\*,1'S\*)** (1.36 g, 34 %) as a white, crystalline solid (Rf 0.4); mp 123-124 °C; (Found C, 71.92; H, 6.92; N, 5.20; S, 11.34. C<sub>17</sub>H<sub>19</sub>NOS requires C, 71.54; H, 6.71; N, 4.91; S, 11.23%);  $\nu_{\max}/\text{cm}^{-1}$  (KBr) 3314 (br NH), 1648 (CO);  $\delta_{\text{H}}$  (270 MHz) 1.29 [3H, d, *J* 7, C(2')H<sub>3</sub>], 1.55 [3H, d, *J* 7, C(3)H<sub>3</sub>], 3.84 [1H, q, *J* 7, C(2)H], 4.95-5.08 (1H, dq, *J* 7, 8, NCH), 6.83 (1H, br s, NH), 6.95-7.35 (10H, m, ArH);  $\delta_{\text{C}}$  (67.8 MHz) 18.1 [C(3)H<sub>3</sub>], 21.5 [C(2')H<sub>3</sub>], 46.5 [C(2)H], 48.0 (NCH), 125.9, 127.1, 128.5, 129.1, 129.9 (aromatic CH), 133.9, 142.7 (quaternary aromatic C), 170.8 (CO); *m/z* 285 (M<sup>+</sup>, 12 %), 176 (98, M<sup>+</sup> - PhS), 137 (100, [PhSCHCH<sub>3</sub>]<sup>+</sup>), 105 (73), 77 (22).

#### **(2R/S, 1'S) N-1'-Phenylethyl-2-(phenylthio)propanamide 21**

This was prepared following the procedure described for (2R\*, 1'R\*)(2R\*, 1'S\*) sulfides **20** using (2R/S, 1'S)-N-1'-phenylethyl-2-chloropropanamide **S15** (3.60 g, 17.06 mmol), thiophenol (1.7 ml, 18.8 mmol), sodium (0.86 g, 37.5 mmol) and dry ethanol (60 ml) to give the sulfide **21** as a light yellow solid (4.30 g, 88 %). Purification by chromatography using ethyl acetate-hexane (10:90) as eluent gave the sulfide **21** (3.90 g, 80 % as an equimolar mixture of diastereomers) as a white, crystalline solid.

#### **N-4'-Methylphenyl-2-(*n*-butylthio)propanamide 23**

#### Method D

*n*-Butanethiol (3.43 g, 37.98 mmol) was added to a solution of freshly prepared sodium ethoxide [made from sodium (0.87 g, 37.98 mmol) in dry ethanol (70 ml) at 0°C] while stirring under nitrogen. The resulting solution was stirred for 20 minutes when *N*-4'-methylphenyl-2-chloropropanamide **S1** (5.00 g, 25.32 mmol) was added gradually over 15 minutes. The reaction solution was typically seen to become cloudy 30 minutes after the final addition of the  $\alpha$ -chloroamide. Following stirring for 16 hours, the reaction was quenched by addition of water (100 ml) and DCM (70 ml). The phases were separated and the aqueous layer was extracted with DCM (2 x 50 ml). The combined organic layers were washed with NaOH (1M, 2 x 100 ml), water (200 ml) and brine (200 ml), dried and concentrated at reduced pressure to give the crude sulfide **23**. This was purified by chromatography on silica gel using ethyl acetate-hexane as eluent (gradient elution 5-20% ethyl acetate) to give the sulfide **23** (6.08 g, 96%) as a clear oil; (Found C, 66.44; H, 8.30; N, 5.57; S, 12.75. C<sub>14</sub>H<sub>21</sub>NOS requires C, 66.89; H, 8.42; N, 5.57; S, 12.76%);  $\nu_{\max}/\text{cm}^{-1}$  (film) 3296 (br NH), 1656 (CO);  $\delta_{\text{H}}$  (270 MHz) 0.91 [3H, t, *J* 7, C(4')H<sub>3</sub>], 1.31-1.48 [2H, m, C(3')H<sub>2</sub>], 1.49-1.65 [5H, m, C(3)H<sub>3</sub>, C(2')H<sub>2</sub>; C(3)H<sub>3</sub> could be distinguished as a doublet at approximately 1.54 ppm], 2.31 (3H, s, ArCH<sub>3</sub>), 2.58 (2H, t, *J* 8, SCH<sub>2</sub>), 3.51 [1H, q, *J* 7, C(2)H], 7.12 (2H, A of ABq, *J* 8, ArH), 7.43 (2H, B of ABq, *J* 8, ArH), 8.66 (1H, b s, NH);  $\delta_{\text{C}}$  (67.8 MHz) 13.4 [C(4')H<sub>3</sub>], 18.5 [C(3)H<sub>3</sub>], 20.7 [ArCH<sub>3</sub>], 21.9 [C(3')H<sub>2</sub>], 31.3 [C(2')H<sub>2</sub>], 31.3 (SCH<sub>2</sub>), 45.4 [C(2)H], 120.0, 129.6 (aromatic CH), 133.9, 135.2 (quaternary aromatic C), 170.7 (CO); *m/z* 251 (M<sup>+</sup>, 18 %), 163 (100), 134 (11, [CONHTol]<sup>+</sup>), 117 (12, M<sup>+</sup> - CONHTol).

#### *N*-Benzyl-2-(*n*-butylthio)propanamide **22**

The title compound was prepared according to the procedure (Method D) described for **23** using *N*-benzyl-2-chloropropanamide **S2** (5.00 g, 25.32 mmol), *n*-butanethiol (3.43 g, 37.98 mmol) and sodium (0.87 g, 37.98 mmol) in dry ethanol (70 ml) to give the crude sulfide **22** which was purified by chromatography on silica gel using ethyl acetate-hexane as eluent (gradient elution 5-20% ethyl acetate) to give the sulfide **22** (6.18 g, 97%) as an off-white low melting solid;  $\nu_{\max}/\text{cm}^{-1}$  (film) 3294 (br NH), 1648 (CO);  $\delta_{\text{H}}$  (270 MHz) 0.87 [3H, t, *J* 7, C(4')H<sub>3</sub>], 1.22-1.41 [2H, m, C(3')H<sub>2</sub>], 1.43-1.59 [5H, m, C(3)H<sub>3</sub>, C(2')H<sub>2</sub>; C(3)H<sub>3</sub> could be distinguished as a doublet at approximately

1.50 ppm], 2.51 (2H, t,  $J$  8, SCH<sub>2</sub>), 3.42 [1H, q,  $J$  7, C(2)H], 4.36-4.53 (2H, m, NCH<sub>2</sub>), 7.14 (1H, b s, NH), 7.22-7.36 (5H, m, ArH);  $\delta_{\text{C}}$  (67.8 MHz) 13.4 [C(4')H<sub>3</sub>], 18.3 [C(3)H<sub>3</sub>], 21.8 [C(3')H<sub>2</sub>], 31.2 [C(2')H<sub>2</sub>], 31.3 (SCH<sub>2</sub>), 43.6 (NCH<sub>2</sub>), 44.9 [C(2)H], 127.4, 127.8, 128.6 (aromatic CH), 138.2 (quaternary aromatic C), 172.5 (CO).

#### ***N*-4'-Fluorophenyl-2-(*n*-butylthio)propanamide 24**

The title compound was prepared using the procedure (Method D) described for **23** using *N*-4'-fluorophenyl-2-chloropropanamide **S9** (5.00 g, 24.80 mmol), *n*-butanethiol (3.36 g, 37.20 mmol) and sodium (0.86 g, 37.20 mmol) in dry ethanol (70 ml). The reaction solution was stirred for 16 h before work-up as described for **23** to give the crude sulfide **24** (6.63 g, 97%) as a pale pink solid which was purified by chromatography on silica gel using ethyl acetate-hexane (gradient elution 5-20% ethyl acetate) as eluent to give **24** as a colourless solid, mp 43-46°C; (Found C, 61.37; H, 7.10; N, 5.51; F, 7.62; S, 12.56. C<sub>13</sub>H<sub>18</sub>NFOS requires C, 61.50; H, 7.11; N, 5.49; F, 7.44; S, 12.66%);  $\nu_{\text{max}}/\text{cm}^{-1}$  (KBr) 1658 (CO), 1509 (vs), 1211;  $\delta_{\text{H}}$  (270 MHz) 0.89 [3H, t,  $J$  7, C(4')H<sub>3</sub>], 1.31-1.66 [7H, m, C(3)H<sub>3</sub>, C(3')H<sub>2</sub>, C(2')H<sub>2</sub>], 2.58 (2H, t,  $J$  8, SCH<sub>2</sub>), 3.52 [1H, q,  $J$  7, C(2)H], 7.02 {2H, overlapping dd [appears as a triplet],  $J$  8, 8, C(3')H}, 7.49-7.58 [2H, m, C(2')H], 8.78 (1H, b s, NH);  $\delta_{\text{C}}$  (67.8 MHz) 13.4 [C(4')H<sub>3</sub>], 18.3 [C(3)H<sub>3</sub>], 21.8 [C(3')H<sub>2</sub>], 31.1 [C(2')H<sub>2</sub> and SCH<sub>2</sub>], 44.9 [C(2)H], 115.5 (d,  $^2J_{\text{CF}}$  24, aromatic CH, ArC(3')), 121.5 (aromatic CH, ArC(2')), 133.7 (quaternary aromatic, ArC(1')), 159.3 [d,  $^1J_{\text{CF}}$  244, quaternary aromatic, ArC(4')], 170.9 (CO);  $m/z$  255.1098 (M<sup>+</sup>, C<sub>13</sub>H<sub>18</sub>NFOS requires 255.1093). 255 (M<sup>+</sup>, 2%), 167 (100), 138 (22, [CONHAr]<sup>+</sup>), 117 (26, M<sup>+</sup> - CONHAr), 111 (40), 75 (45).

#### ***N*-4'-Methylphenyl-2-(4-methoxybenzenethio)propanamide 25**

The title compound was prepared according to the procedure (Method C) described for **15** using *N*-4'-methylphenyl-2-chloropropanamide **S1** (3.80 g, 19.25 mmol), 4-methoxybenzenethiol (2.75 ml, 22.25 mmol) and sodium (1.03 g, 44.8 mmol) in dry ethanol (80 ml) to give the sulfide **25** as a brown solid (4.70 g, 81%). Trituration with hexane gave **25** (4.36 g, 75%) as a white solid, mp 101-102 °C; (Found C, 67.95; H, 6.45; N, 4.76; S, 10.40. C<sub>17</sub>H<sub>19</sub>NO<sub>2</sub>S requires C, 67.74; H, 6.35; N, 4.65; S, 10.64%);  $\nu_{\text{max}}/\text{cm}^{-1}$  (KBr) 3314, 1661 (CO), 1600, 1534, 1493;  $\delta_{\text{H}}$  (270 MHz) 1.55 [3H, d,  $J$  7,

C(3)H<sub>3</sub>], 2.30 (3H, s, Ar CH<sub>3</sub>), 3.72 [1H, q, *J* 7, C(2)H], 3.76 (3H, s, OCH<sub>3</sub>), 6.79-6.84 (2H, m, ArH), 7.09-7.15 (2H, m, ArH), 7.35-7.44 (4H, m, ArH), 8.26 (1H, b s, NH);  $\delta_{\text{C}}$  (67.8 MHz) 17.8 [C(3)H<sub>3</sub>], 20.8 (ArCH<sub>3</sub>), 49.0 [C(2)H], 55.2 (OCH<sub>3</sub>), 114.9, 119.8 (aromatic CH), 123.0 (quaternary aromatic C), 129.4 (aromatic CH), 134.0 (quaternary aromatic C), 134.7 (aromatic CH), 135.0 (quaternary aromatic C), 160.0 (C-OMe), 170.0 (CO); *m/z* 301 (M<sup>+</sup>, 82%), 167 (100, M<sup>+</sup> - CONHTol), 139 (41, [SAr]<sup>+</sup>), 134 (76, [CONHTol]<sup>+</sup>), 107 (56), 91(47).

### ***N*-Benzyl-2-(4-methoxybenzenethio)propanamide 26**

The title compound was prepared according to the procedure (Method C) described for **15** using *N*-benzyl-2-chloropropanamide **S2** (2.00 g, 10.13 mmol), 4-methoxybenzenethiol (1.50 ml, 12.16 mmol) and sodium (0.51 g, 22.29 mmol) in dry ethanol (22 ml) to give the crude sulfide which was purified by chromatography on silica gel using ethyl acetate-hexane (30:70) as eluent to give the sulfide **26** (2.74 g, 90%) as a colourless solid, mp 88-90°C; (Found C, 67.89; H, 6.25; N, 4.90; S, 10.66. C<sub>17</sub>H<sub>19</sub>NO<sub>2</sub>S requires C, 67.74; H, 6.35; N, 4.65; S, 10.645);  $\nu_{\text{max}}/\text{cm}^{-1}$  (KBr) 3268, 1652 (CO), 1246;  $\delta_{\text{H}}$  (270 MHz) 1.51 [3H, d, *J* 7, C(3)H<sub>3</sub>], 3.69 [1H, q, *J* 7, C(2)H], 3.78 (3H, s, OCH<sub>3</sub>), 4.30-4.48 (2H, symmetrical m, NCH<sub>2</sub>), 6.73-6.81 (3H, m, NH, ArH), 7.10-7.17 (2H, m, ArH), 7.20-7.34 (5H, m, ArH);  $\delta_{\text{C}}$  (67.8 MHz) 18.1 [C(3)H<sub>3</sub>], 43.8 (NCH<sub>2</sub>), 48.3 [C(2)H], 55.3 (OCH<sub>3</sub>), 114.8 (aromatic CH), 123.7 (quaternary aromatic C), 127.5, 127.8, 128.7, 134.2 (aromatic CH), 138.0 (quaternary aromatic C), 159.8 (C-OMe), 171.8 (CO); *m/z* 301.1144 (M<sup>+</sup>, C<sub>17</sub>H<sub>19</sub>NO<sub>2</sub>S requires 301.1137). 301 (M<sup>+</sup>, 12%), 162 (40, M<sup>+</sup> - SAr), 91 (40), 69 (100).

### ***N*-Ethyl-2-(4-methoxybenzenethio)propanamide 27**

The title compound was prepared according to the procedure (Method C) described for **15** using *N*-ethyl-2-chloropropanamide **S3** (2.00 g, 14.80 mmol), 4-methoxybenzenethiol (2.00 ml, 16.30 mmol) and sodium (0.75 g, 32.60 mmol) in dry ethanol (60 ml) to give the sulfide **27** (3.44 g, 97%) as a golden oil which solidified on standing to a low melting solid. A sample of the crude product was purified by chromatography on silica gel using ethyl acetate-hexane as eluent for analysis;  $\nu_{\text{max}}/\text{cm}^{-1}$  (KBr) 1664 (CO), 1494, 1247, 745;  $\delta_{\text{H}}$  (270 MHz) 1.07 (3H, t, *J* 7, CH<sub>2</sub>CH<sub>3</sub>), 1.44 [3H, d, *J* 7, C(3)H<sub>3</sub>], 3.22-3.38 (2H, m, NCH<sub>2</sub>), 3.61 [1H, q, *J* 7,

C(2)H], 3.84 (3H, s, OCH<sub>3</sub>), 6.48 (1H, b s, NH), 6.83 (2H, A of ABq, *J* 9, ArH), 7.33 (2H, B of ABq, *J* 9, ArH);  $\delta_{\text{C}}$  (67.8 MHz) 14.6 (CH<sub>2</sub>CH<sub>3</sub>), 18.0 [C(3)H<sub>3</sub>], 34.5 (NCH<sub>2</sub>), 48.2 [C(2)H], 55.2 (OCH<sub>3</sub>), 114.7 (aromatic CH), 123.8 (quaternary aromatic C), 134.2 (aromatic CH), 159.7 (C-OMe), 171.7 (O); *m/z* 239.0979 (M<sup>+</sup>, C<sub>12</sub>H<sub>17</sub>NO<sub>2</sub>S requires 239.0980). 239 (M<sup>+</sup>, 60%), 167 (100, M<sup>+</sup> - CONHEt), 139 (40, [SAr]<sup>+</sup>), 44 (25).

*Note:* This compound has also been prepared using Method B to give the sulfide **27** in 76% yield.

### 2-(4-Methoxybenzenethio)propanamide **132**

The title compound was prepared according to the procedure (Method C) described for **15** using 2-chloropropanamide **S11** (1.80 g, 16.70 mmol), 4-methoxybenzenethiol (2.30 ml, 18.40 mmol) and sodium (0.85 g, 36.80 mmol) in dry ethanol (60 ml) to give the crude sulfide **132** which was purified by trituration with ether-hexane to give the sulfide **132** (3.01 g, 85%) as a colourless solid; (Found C, 56.85; H, 6.31; N, 6.59; S, 15.22. C<sub>10</sub>H<sub>13</sub>NO<sub>2</sub>S requires C, 56.85; H, 6.20; N, 6.63; S, 15.17%);  $\nu_{\text{max}}/\text{cm}^{-1}$  (KBr) 1630 (CO), 1459, 1248, 1027;  $\delta_{\text{H}}$  (270 MHz) 1.48 [3H, d, *J* 7, C(3)H<sub>3</sub>], 3.61 [1H, q, *J* 7, C(2)H], 3.79 (3H, s, OCH<sub>3</sub>), 6.07 (1H, b s, NH), 6.33 (1H, b s, NH), 6.84 (2H, A of ABq, *J* 9, ArH), 7.38 (2H, B of ABq, *J* 9, ArH);  $\delta_{\text{C}}$  (67.8 MHz) 17.9 [C(3)H<sub>3</sub>], 47.8 [C(2)H], 55.4 (OCH<sub>3</sub>), 114.8 (aromatic CH), 123.5 (quaternary aromatic C), 134.7 (aromatic CH), 160.0 (C-OMe), 175.0 (CO); *m/z* 211.0663 (M<sup>+</sup>, C<sub>10</sub>H<sub>13</sub>NO<sub>2</sub>S requires 211.0667), 211 (M<sup>+</sup>, 90), 167 (100, M<sup>+</sup>-CONH<sub>2</sub>), 139 (60), 77 (28).

### *N,N*-Dimethyl-2-(4-methoxybenzenethio)propanamide **28**

The title compound was prepared according to the procedure (Method C) described for **15** using *N,N*-dimethyl-2-chloropropanamide **S13** (2.00 g, 14.80 mmol), 4-methoxybenzenethiol (2.00 ml, 16.30 mmol) and sodium (0.75 g, 32.60 mmol) in dry ethanol (60 ml) to give the sulfide **28** (3.44 g, 97%) as a golden oil which solidified on recrystallisation from cyclohexane/ether to give **28** (2.91 g, 82%) as a colourless solid, (Found C, 60.22; H, 7.26; N, 5.85; S, 13.28. C<sub>12</sub>H<sub>17</sub>NO<sub>2</sub>S requires C, 60.22; H, 7.16; N, 5.85; S, 13.40%);  $\nu_{\text{max}}/\text{cm}^{-1}$  (KBr) 1634 (CO), 1492, 1246, 1022;  $\delta_{\text{H}}$  (270 MHz) 1.41 [3H, d, *J* 7, C(3)H<sub>3</sub>], 2.94 [3H, s, one of N(CH<sub>3</sub>)<sub>2</sub>], 2.98 [3H, s, one of

$N(CH_3)_2$ ], 3.83 (3H, s,  $OCH_3$ ), 3.91 [1H, q,  $C(2)H$ ], 6.84 (2H, A of ABq,  $J$  9,  $ArH$ ), 7.40 (2H, B of ABq,  $J$  9,  $ArH$ );  $\delta_C$  (67.8 MHz) 17.6 [ $C(3)H_3$ ], 35.9 [one of  $N(CH_3)_2$ ], 37.0 [one of  $N(CH_3)_2$ ], 42.8 [ $C(2)H$ ], 55.2 ( $OCH_3$ ), 114.3 (aromatic CH), 122.8 (quaternary aromatic C), 136.4 (aromatic CH), 160.2 (C-OMe), 171.3 (CO);  $m/z$  (EI) 239.0983, ( $M^+$ ,  $C_{12}H_{17}NO_2S$  requires 239.0980), 239 ( $M^+$ , 65), 167 (100,  $M^+ - CONMe_2$ ), 139 (33,  $[SAr]^+$ ), 72 (35).

### ***N,N*-Diphenyl-2-(4-methoxybenzenethio)propanamide 133**

The title compound was prepared according to the procedure (Method C) described for **15** using *N,N*-diphenyl-2-chloropropanamide **S12** (2.00 g, 7.70 mmol), 4-methoxybenzenethiol (1.05 ml, 8.50 mmol) and sodium (0.39 g, 17.00 mmol) in dry ethanol (40 ml) to give the crude sulfide **133** which was purified by trituration from ether-hexane to give the sulfide **133** (2.26 g, 81%) as a colourless solid, (Found C, 72.58; H, 5.86; N, 3.89; S, 9.00.  $C_{22}H_{21}NO_2S$  requires C, 72.70; H, 5.82; N, 3.85; S, 8.82%);  $\nu_{max}/cm^{-1}$  (KBr) 1654 (CO), 1589, 1491, 1450, 1245, 1026, 831;  $\delta_H$  (270 MHz) 1.43 [3H, d,  $J$  7,  $C(3)H_3$ ], 3.76-3.87 (4H, m,  $CHS$ ,  $OCH_3$ ;  $OCH_3$  could be distinguished as a singlet at 3.79 ppm), 6.77-6.83 (2H, m,  $ArH$ ), 7.01-7.39 (12H, broad m,  $ArH$ );  $\delta_C$  (67.8 MHz) 17.8 [ $C(3)H_3$ ], 44.7 [ $C(2)H$ ], 55.3 ( $OCH_3$ ), 114.7 (aromatic CH), 123.3 (quaternary aromatic C), 124.5-131.0 (aromatic C of  $Ph_2$ -broad signal), 137.1 (aromatic CH), 142.6 (quaternary aromatic C), 160.3 (C-OMe), 172.3 (CO);  $m/z$  363.1269, ( $M^+$ ,  $C_{22}H_{21}NO_2S$  requires 363.1293), 363 ( $M^+$ , 48%), 223 (18), 169 (100), 167 (65,  $M^+ - CONPh_2$ ), 32 (43).

### ***N*-4'-Methylphenyl-2-(4-nitrobenzenethio)propanamide 29**

Method E

Sodium hydride (0.91 g of 60% dispersion in mineral oil, 22.8 mmol) was placed in a 3-necked round bottom flask under a flow of nitrogen. Following washing with hexane (3 x 10 ml), dry DMF (90 ml) was added *via* cannula and the resulting suspension stirred for 10 minutes. 4-Nitrobenzenethiol (4.43 g of 80% pure material, 22.8 mmol) was added as a solid from a tipper and the red solution which formed was stirred for 1 h. The amide **S1** (3.00 g, 15.2 mmol) in DMF (10 ml) was added over 10 minutes and stirring was continued for 18 h at which time a sample (3 ml) of the reaction mixture was removed for NMR analysis (60 MHz) which showed the

reaction to be 92% complete. After stirring for a further 24 hours, water (200 ml) and DCM (100 ml) were added and the phases split. The aqueous layer was extracted with DCM (2 x 50 ml) and the combined organic layers were washed with water (2 x 200ml) and brine (100 ml), dried and evaporated at reduced pressure to give the sulfide **29** as a sticky yellow solid. NMR showed the reaction to be complete and, following purification by chromatography on silica gel using ethyl acetate-hexane (gradient elution 10-30% ethyl acetate) as eluent, the sulfide **29** (3.7 g, 77%) was isolated as a yellow solid, mp 135-136 °C; (Found C, 60.67; H, 5.10; N, 8.57; S, 9.80.  $C_{16}H_{16}N_2O_3S$  requires C, 60.74; H, 5.10; N, 8.86; S, 10.13%);  $\nu_{\max}/\text{cm}^{-1}$  (KBr) 1656 (CO), 1513, 1339;  $\delta_{\text{H}}$  (270 MHz) 1.71 [3H, d,  $J$  7,  $C(3)H_3$ ], 2.29 (3H, s,  $\text{ArCH}_3$ ), 4.08 [1H, q,  $J$  7,  $C(2)H$ ], 7.10 (2H, d,  $J$  8,  $\text{ArH}$ ), 7.35 (2H, d,  $J$  8,  $\text{ArH}$ ), 7.42 (2H, d,  $J$  11,  $\text{ArH}$ ), 8.12 (2H, d,  $J$  11,  $\text{ArH}$ ), 8.28 (1H, b s,  $NH$ );  $\delta_{\text{C}}$  (67.8 MHz) 18.0 [ $C(3)H_3$ ], 20.8 ( $\text{ArCH}_3$ ), 46.5 [ $C(2)H$ ], 120.2, 124.2, 128.2, 129.6 (aromatic CH), 134.5, 134.8, 143.6, 146.3 (quaternary aromatic C), 168.9 (CO).

#### ***N*-4'-Methylphenyl-2-(*iso*-butylthio)propanamide **30****

The title compound was prepared according to the procedure (Method A) described for **1** using *N*-4'-methylphenyl-2-chloropropanamide **S1** (5.00 g, 25.32 mmol), 2-methylpropanethiol (3.00 ml, 27.85 mmol) and sodium (0.64 g, 27.85 mmol) in dry ethanol (50 ml) to give the crude sulfide **30** which was purified by chromatography on silica gel using hexane-ethyl acetate as eluent (gradient elution 0-30% EtOAc) to give the sulfide **30** (5.40 g, 85%) as an off-white solid, mp 72-74 °C; (Found C, 66.77; H, 8.36; N, 5.63; S, 13.05.  $C_{14}H_{21}NOS$  requires C, 67.04; H, 8.42; N, 5.37; S, 12.86%);  $\nu_{\max}/\text{cm}^{-1}$  (KBr) 3286, 1657 (CO), 1249, 817;  $\delta_{\text{H}}$  0.98 [3H, d,  $J$  6.6, one of  $\text{CH}(\text{CH}_3)_2$ ], 0.99 [3H, d,  $J$  6.6, one of  $\text{CH}(\text{CH}_3)_2$ ], 1.54 [3H, d,  $J$  7.4,  $C(3)H_3$ ], 1.69-1.91 [1H, sym m,  $\text{CH}(\text{CH}_3)_2$ ], 2.32 (3H, s,  $\text{ArCH}_3$ ), 2.36-2.54 (2H, m,  $\text{SCH}_2$ ), 3.49 [1H, q,  $J$  7.4,  $C(2)H$ ], 7.12 (2H, A of ABq,  $J$  6.8,  $\text{ArH}$ ), 7.35 (2H, B of ABq,  $J$  6.8,  $\text{ArH}$ ), 8.63 (1H, bs,  $NH$ );  $\delta_{\text{C}}$  19.1 [ $C(3)H_3$ ], 21.3 ( $\text{ArCH}_3$ ), 22.3 [one of  $\text{CH}(\text{CH}_3)_2$ ], 22.5 [one of  $\text{CH}(\text{CH}_3)_2$ ], 28.8 [ $\text{CH}(\text{CH}_3)_2$ ], 41.0 ( $\text{SCH}_2$ ), 46.3 [ $C(2)H$ ], 120.0, 129.9 (aromatic CH), 134.4, 135.6 (quaternary aromatic C), 171.2 (CO);  $m/z$  251.13439, ( $M^+$ ,  $C_{14}H_{21}NOS$  requires 251.13440). ( $M^+$ , 83%), 163 (100,  $M^+$ -SR), 134 (81), 117 (71).

### ***N*-4'-Fluorophenyl-2-(*iso*-butylthio)propanamide **31****

The title compound was prepared according to the procedure (Method A) described for **1** using *N*-4'-fluorophenyl-2-chloropropanamide **S9** (5.00 g, 24.80 mmol), 2-methylpropanethiol (3.00 ml, 27.30 mmol) and sodium (0.63 g, 27.30 mmol) in dry ethanol (50 ml) to give the crude sulfide **31** which was purified by chromatography on silica gel using hexane-ethyl acetate as eluent (gradient elution 0-30% EtOAc) to give the sulfide **31** (3.83 g, 87%) as an off-white solid, mp 72-74 °C; (Found C, 61.33; H, 7.11; N, 5.49; S, 12.80, F, 7.63. C<sub>13</sub>H<sub>18</sub>NOSF requires C, 61.15; H, 7.10; N, 5.48; S, 12.56%);  $\nu_{\max}/\text{cm}^{-1}$  (KBr) 2957, 1660 (CO), 1509;  $\delta_{\text{H}}$  (300 MHz) 0.99 [3H, d, *J* 6.6, one of CH(CH<sub>3</sub>)<sub>2</sub>], 1.00 [3H, d, *J* 6.6, one of CH(CH<sub>3</sub>)<sub>2</sub>], 1.54 [3H, d, *J* 7.8, C(3)H<sub>3</sub>], 1.71-1.92 [1H, m, CH(CH<sub>3</sub>)<sub>2</sub>], 2.32-2.52 (2H, m, SCH<sub>2</sub>), 3.49 [1H, q, *J* 7.4, C(2)H], 6.97-7.13 [2H, m, ArC(3')H], 7.42-7.59 [2H, m, ArC(2')H], 8.68 (1H, bs, NH);  $\delta_{\text{C}}$  (75.5 MHz) 18.7 [C(3)H<sub>3</sub>], 21.9 [one of CH(CH<sub>3</sub>)<sub>2</sub>], 22.1 [one of CH(CH<sub>3</sub>)<sub>2</sub>], 28.4 [CH(CH<sub>3</sub>)<sub>2</sub>], 40.7 (SCH<sub>2</sub>), 45.9 [C(2)H], 115.7 [d, <sup>2</sup>*J*<sub>CF</sub> 23, ArC(3')], 121.3 [d, <sup>3</sup>*J*<sub>CF</sub> 8, ArC(2')], 133.5 [d, <sup>4</sup>*J*<sub>CF</sub> 3, quaternary ArC(1')], 159.4 [d, <sup>1</sup>*J*<sub>CF</sub> 245, ArC(4')], 170.9 (CO); *m/z* 255.10950, (M<sup>+</sup>, C<sub>13</sub>H<sub>18</sub>NFOS requires 255.10930), 255 (M<sup>+</sup>, 53%), 138 (67, M<sup>+</sup>-CONHAr), 101 (28, M<sup>+</sup>-Cl-CONHAr), 88 (21, SAr<sup>+</sup>) 57 (100).

### ***N*-Ethyl-2-(*iso*-butylthio)propanamide **32****

The title compound was prepared according to the procedure (Method B) described for **10** using a solution of *N*-ethyl-2-chloropropanamide **S3** (5.00 g, 36.90 mmol) in DMF (5 ml) added to a solution of sodium hydride (1.49 g of 60% dispersion in mineral oil, 38.74 mmol) and 2-methylpropanethiol (4.41 ml, 40.60 mmol) in DMF (150 ml). After chromatography on silica gel using ethyl acetate-hexane (gradient elution 0-20% ethyl acetate), the sulfide **32** was isolated (5.60 g, 80%) as a low melting solid, (Found C, 56.84; H, 10.32; N, 7.39; S, 16.69. C<sub>9</sub>H<sub>19</sub>NOS requires C, 57.09; H, 10.12; N, 7.40; S, 16.94%);  $\nu_{\max}/\text{cm}^{-1}$  (film) 1644 (CO), 1555, 1073;  $\delta_{\text{H}}$  (300 MHz) 0.96 [6H, d, *J* 7.0, CH(CH<sub>3</sub>)<sub>2</sub>], 1.17 (3H, t, *J* 7.2, CH<sub>2</sub>CH<sub>3</sub>), 1.45 [3H, d, *J* 7.4, C(3)H<sub>3</sub>], 1.61-1.91 [1H, m, CH(CH<sub>3</sub>)<sub>2</sub>], 2.31-2.44 (2H, m, SCH<sub>2</sub>), 3.31-3.42 [4H, m, CH<sub>2</sub>CH<sub>3</sub>, C(2)H], 6.83 (1H, bs, NH);  $\delta_{\text{C}}$  (75.5 MHz) 14.8 (CH<sub>2</sub>CH<sub>3</sub>), 18.8 [C(3)H<sub>3</sub>], 21.9 [one of CH(CH<sub>3</sub>)<sub>2</sub>], 22.1 [one of CH(CH<sub>3</sub>)<sub>2</sub>], 28.4 [CH(CH<sub>3</sub>)<sub>2</sub>], 34.5 (NCH<sub>2</sub>), 40.7 (SCH<sub>2</sub>), 45.1 [C(2)H], 172.6 (CO); *m/z* 189.11874, (M<sup>+</sup>, C<sub>9</sub>H<sub>19</sub>NOS requires 189.11893), 189 (M<sup>+</sup>, 53%), 190 (M<sup>+</sup> + 1), 101 (67, M<sup>+</sup>-SR), 57 (50).

### ***N*-Isopropyl-2-(*iso*-butylthio)propanamide **134****

The title compound was prepared according to the procedure (Method B) described for **10** using a solution of *N*-isopropyl-2-chloropropanamide **S4** (5.00 g, 33.40 mmol) in DMF (5 ml) added to a solution of sodium hydride (1.40 g of 60% dispersion in mineral oil, 35.07 mmol) and 2-methylpropanethiol (4.00 ml, 36.74 mmol) in DMF (150 ml). After chromatography on silica gel using ethyl acetate-hexane (gradient elution 0-20% ethyl acetate), the sulfide **134** was isolated (6.10 g, 87%) as a low melting solid, (Found C, 58.84; H, 10.42; N, 6.74; S, 15.47. C<sub>10</sub>H<sub>21</sub>NOS requires C, 59.07; H, 10.41; N, 6.89; S, 15.77%);  $\nu_{\max}/\text{cm}^{-1}$  (film) 1638 (CO), 1212, 908;  $\delta_{\text{H}}$  (300 MHz) 1.01 [6H, d,  $J$  6.6, SCH<sub>2</sub>CH(CH<sub>3</sub>)<sub>2</sub>], 1.17 [3H, t,  $J$  6.6, one of NHCH(CH<sub>3</sub>)<sub>2</sub>], 1.18 [3H, t,  $J$  6.6, one of NHCH(CH<sub>3</sub>)<sub>2</sub>], 1.43 [3H, d,  $J$  7.3, C(3)H<sub>3</sub>], 1.69-1.89 [1H, m, SCH<sub>2</sub>CH(CH<sub>3</sub>)<sub>2</sub>], 2.28-2.46 (2H, m, SCH<sub>2</sub>), 3.33 [1H, q,  $J$  7.3, C(2)H], 3.98-4.15 [1H, m, NCH(CH<sub>3</sub>)<sub>2</sub>], 6.89 (1H, bd,  $J$  7.3, NH);  $\delta_{\text{C}}$  (75.5 MHz) 18.7 [C(3)H<sub>3</sub>], 21.9 [one of SCH<sub>2</sub>CH(CH<sub>3</sub>)<sub>2</sub>], 22.1 [one of SCH<sub>2</sub>CH(CH<sub>3</sub>)<sub>2</sub>], 22.6 [2 x NCH(CH<sub>3</sub>)<sub>2</sub>], 28.4 [SCH<sub>2</sub>CH(CH<sub>3</sub>)<sub>2</sub>], 40.5 (SCH<sub>2</sub>), 41.4 [NCH(CH<sub>3</sub>)<sub>2</sub>], 44.9 (SCH), 171.7 (CO);  $m/z$  204 (M<sup>+</sup> + 1, 53%), 115 (100, M<sup>+</sup> - SR), 57 (45).

### ***N*-4'-Fluorophenyl-2-(*iso*-propylthio)propanamide **33****

The title compound was prepared according to the procedure (Method A) described for **1** using *N*-4'-fluorophenyl-2-chloropropanamide **S9** (9.61 g, 47.69 mmol), *iso*-propylthiol (6.11 ml, 52.17 mmol) and sodium (1.20 g, 52.17 mmol) in dry ethanol (96 ml) to give the crude sulfide **33** which was purified by chromatography on silica gel using hexane-ethyl acetate as eluent (gradient elution 0-30% EtOAc) to give the sulfide **33** (10.34 g, 90%) as an off-white solid, mp 84-85 °C; (Found C, 59.63; H, 6.78; N, 5.75; S, 13.60, F, 7.61. C<sub>12</sub>H<sub>16</sub>NOSF requires C, 59.72; H, 6.68; N, 5.80; S, 13.29, F, 7.87%);  $\nu_{\max}/\text{cm}^{-1}$  (KBr) 3264, 1660 (CO), 1509;  $\delta_{\text{H}}$  (300 MHz) 1.29 [3H, d,  $J$  6.7, one of CH(CH<sub>3</sub>)<sub>2</sub>], 1.32 [3H, d,  $J$  6.7, one of CH(CH<sub>3</sub>)<sub>2</sub>], 1.55 [3H, d,  $J$  7.8, C(3)H<sub>3</sub>], 3.01 [1H, m, CH(CH<sub>3</sub>)<sub>2</sub>], 3.54 (1H, q,  $J$  6.8, SCH<sub>2</sub>), 6.91-7.08 [2H, m, ArC(3')H], 7.41-7.56 [2H, m, ArC(2')H], 8.72 (1H, bs, NH);  $\delta_{\text{C}}$  (75.5 MHz) 19.2 [C(3)H<sub>3</sub>], 23.5 [one of CH(CH<sub>3</sub>)<sub>2</sub>], 23.5 [one of CH(CH<sub>3</sub>)<sub>2</sub>], 36.2 [CH(CH<sub>3</sub>)<sub>2</sub>], 44.8 [C(2)H], 115.7 [d,  $^2J_{\text{CF}}$  23, ArC(3')], 121.4 [d,  $^3J_{\text{CF}}$  8, ArC(2')], 133.7 [d,  $^4J_{\text{CF}}$  3,

quaternary ArC(1')), 159.4 [d,  $^1J_{\text{CF}}$  245, ArC(4')], 171.4 (CO);  $m/z$  241.09322, ( $\text{M}^+$ ,  $\text{C}_{12}\text{H}_{16}\text{NFOS}$  requires 241.09367), 241 ( $\text{M}^+$ , 15%), 167 (100), 138 (45), 111 (75).

### ***N*-Benzyl-2-(benzylthio)propanamide 34**

The title compound was prepared according to the procedure (Method A) described for **1** using *N*-benzyl-2-chloropropanamide **S2** (4.00g, 20 mmol), benzylmercaptan (2.85 ml, 24 mmol) and sodium (0.55g, 24 mmol) in dry ethanol (85 ml) to give the crude sulfide **34** and dibenzyl disulfide in the ratio 1:0.22. This was purified by chromatography on silica gel using hexane-ethyl acetate as eluent (gradient elution 2-40% EtOAc) to give the sulfide **34** (4.58 g, 80 %) as a white solid, mp 66-67 °C; (Found C, 71.23; H, 6.63; N, 5.05; S, 11.12.  $\text{C}_{17}\text{H}_{19}\text{NOS}$  requires C, 71.54; H, 6.71; N, 4.91%; S, 11.24);  $\nu_{\text{max}}/\text{cm}^{-1}$  (KBr) 3289 (NH), 3029 (CH), 1648 (CO), 1555 (NH bend), 1495, 1453 (CN stretch);  $\delta_{\text{H}}$  (300 MHz) 1.39 [3H, d,  $J$  7.3, C(3) $\text{H}_3$ ], 3.28 [1H, q,  $J$  7.3, C(2) $\text{H}$ ], 3.70 (2H, s,  $\text{CH}_2\text{S}$ ), 4.26 (1H, A of ABX,  $J_{\text{AB}}$  14.7,  $J_{\text{AX}}$  5.9, one of  $\text{CH}_2\text{NH}$ ), 4.34 (1H, B of ABX,  $J_{\text{AB}}$  14.7,  $J_{\text{BX}}$  5.9, one of  $\text{CH}_2\text{NH}$ ), 6.94 (1H, b s, NH), 7.10-7.32 (10H, m, ArH);  $\delta_{\text{C}}$  (75.5 MHz) 17.5 [C(3) $\text{H}_3$ ], 35.3 ( $\text{SCH}_2$ ), 42.7 ( $\text{CH}_2\text{NH}$ ), 43.2 [C(2) $\text{H}$ ], 126.3, 126.6, 126.7, 127.7, 127.7, 127.8 (aromatic CH), 136.3, 137.1 (quaternary aromatic C), 171.1 (CO);  $m/z$  286 [ $(\text{M}+\text{H})^+$ , 100%].

### ***N*-4'-Fluorophenyl-2-(benzylthio)propanamide 35**

The title compound was prepared following the procedure (Method A) described for **1** using *N*-4'-fluorophenyl-2-chloropropanamide **S9** (2.80 g, 16 mmol), benzylmercaptan (2.28 ml, 19 mmol) and sodium (0.44 g, 19 mmol) in dry ethanol (70 ml). The reaction solution was stirred for 16 hours before work-up as described for **1** gave the crude sulfide and dibenzyl disulfide in the ratio 1:0.22. This was purified by column chromatography on silica gel using hexane-ethyl acetate as eluent (gradient elution 5-40% ethyl acetate) to give **35** (1.62 g, 35%)\* as a pale pink solid, mp 99-101°C; (Found C, 66.40; H, 5.59; N, 4.44; S, 11.16; F, 6.83.  $\text{C}_{16}\text{H}_{16}\text{FNOS}$  requires C, 66.41; H, 5.57; N, 4.84; S, 11.08; F, 6.57%);  $\nu_{\text{max}}/\text{cm}^{-1}$  (KBr) 3297 (NH), 2928 (CH), 1654 (CO), 1558 (NH bend), 1507, 1378 (CN stretch);  $\delta_{\text{H}}$  (300 MHz) 1.53 [3H, d,  $J$  7.4, C(3) $\text{H}_3$ ], 3.43 [1H, q,  $J$  7.4, C(2) $\text{H}$ ], 3.78 (2H, s,  $\text{CH}_2\text{S}$ ), 7.00 {2H, overlapping dd [appears as a triplet],  $J$  8.8, 8.8, C(3') $\text{H}$ }, 7.16-7.45 (7H, m, ArH), 8.43 (1H, b s, NH);  $\delta_{\text{C}}$  (75.5 MHz) 18.9 [C(3) $\text{H}_3$ ], 36.9 ( $\text{CH}_2\text{S}$ ), 45.6 [C(2) $\text{H}$ ], 116.0

[d,  $^2J_{\text{CF}}$  23, aromatic CH, ArC(3')], 121.8 [d,  $^3J_{\text{CF}}$  8, aromatic CH, ArC(2')], 127.9, 129.2, (aromatic CH), 134.0, 137.6 (quaternary aromatic C), 159.8 [d,  $^1J_{\text{CF}}$  244, quaternary aromatic, ArC(4')], 170.8 (CO);  $m/z$  290 [(M+H)<sup>+</sup>, 8%], 189 [(M - NHAr)<sup>+</sup>, 17%], 91 [(C<sub>7</sub>H<sub>7</sub>)<sup>+</sup>, 100%].

\*A yield of 84% was obtained for a batch that was later synthesised.

### ***N*-*n*-Butyl-2-(benzylthio)propanamide 36**

The title compound was prepared according to the procedure (Method B) described for **10** using a solution of *N*-*n*-butyl-2-chloropropanamide **S5** (1.60 g, 9.8 mmol) in DMF (3 ml) added to a solution of sodium hydride (0.49 g of 50% dispersion in mineral oil, 10.3 mmol) and benzylmercaptan (1.22 ml, 10.3 mmol) in DMF (50 ml). After chromatography on silica gel using ethyl acetate-hexane (gradient elution 5-40% ethyl acetate), the sulfide **36** (1.50g, 61%) was isolated as a pale yellow oil;  $\nu_{\text{max}}/\text{cm}^{-1}$  (film) 3293 (NH), 3064 (CH), 1647 (CO), 1603 (NH bend), 1495, 1452 (CN stretch);  $\delta_{\text{H}}$  (300 MHz) 0.93 [3H, t,  $J$  7.2, C(4')H<sub>3</sub>], 1.23-1.49 [7H, m, includes C(3')H<sub>2</sub>, C(2')H<sub>2</sub> and C(3)H<sub>3</sub>; C(3)H<sub>3</sub> could be distinguished as a doublet at 1.43 ppm,  $J$  7.4], 3.14-3.26 (2H, m, CH<sub>2</sub>NH), 3.29 [1H, q,  $J$  7.4, C(2)H], 3.72 (2H, s, SCH<sub>2</sub>), 6.60 (1H, b s, NH), 7.22-7.36 (5H, m, ArH);  $\delta_{\text{C}}$  (75.5 MHz) 14.2 [C(4')H<sub>3</sub>], 19.0 [C(3)H<sub>3</sub>], 20.5 [C(3')H<sub>2</sub>], 32.0 [C(2')H<sub>2</sub>], 36.8 (CH<sub>2</sub>S), 39.8 (CH<sub>2</sub>N), 44.8 [C(2)H], 127.7, 129.1, 129.2 (aromatic CH), 137.8 (quaternary aromatic C), 172.5 (CO);  $m/z$  274.1240, [(M+Na)<sup>+</sup>, C<sub>14</sub>H<sub>21</sub>NOSNa requires 274.1242), 274 [(M+Na)<sup>+</sup>, 14%], 91 (C<sub>7</sub>H<sub>7</sub><sup>+</sup>, 100%).

### ***N,N*-Dimethyl-2-(benzylthio)propanamide 37<sup>11</sup>**

This was prepared following the procedure (Method A) described for **1** using *N,N*-dimethyl-2-chloropropanamide **S13** (7.86 g, 60 mmol), benzylmercaptan (8.25 ml, 70 mmol) and sodium (1.60 g, 70 mmol) in dry ethanol (130 ml). The reaction solution was stirred for 16 hours before work-up as described for **1** to give the crude sulfide and dibenzyl disulfide in the ratio 1:0.02. Purification by column chromatography on silica gel using hexane-ethyl acetate as eluent (gradient elution 5-15% ethyl acetate) gave **37** (10.41 g, 78%) as a pale yellow oil;  $\nu_{\text{max}}/\text{cm}^{-1}$  (film) 2928 (CH), 1644 (CO), 1494, 1454 (CN stretch);  $\delta_{\text{H}}$  (300 MHz) 1.49 [3H, d,  $J$  6.8, C(3)H<sub>3</sub>], 2.86 [3H, s, one of N(CH<sub>3</sub>)<sub>2</sub>], 2.90 [3H, s, one of N(CH<sub>3</sub>)<sub>2</sub>], 3.53 [1H, q,  $J$  6.8, C(2)H], 3.74 (1H, A of

ABq,  $J_{AB}$  13.3, one of SCH<sub>2</sub>), 3.80 (1H, B of ABq,  $J_{AB}$  13.3, one of SCH<sub>2</sub>), 7.18-7.35 (5H, m, ArH);  $\delta_c$  (75.5 MHz) 18.3 [C(3)H<sub>3</sub>], 34.3 (SCH<sub>2</sub>), 36.41 [one of N(CH<sub>3</sub>)<sub>2</sub>], 37.5 [one of N(CH<sub>3</sub>)<sub>2</sub>], 38.2 [C(2)H], 127.5, 128.8, 129.4 (aromatic CH), 138.3 (aromatic C), 171.5 (CO);  $m/z$  224.1114, ([M+H]<sup>+</sup>, C<sub>12</sub>H<sub>18</sub>NOS requires 224.1109), 224 [(M+H)<sup>+</sup>, 100%], 91 (C<sub>7</sub>H<sub>7</sub><sup>+</sup>, 15%).

### ***N*-4'-Methylphenyl-2-(benzylthio)propanamide 38**

This was synthesized following the procedure (Method A) described for **1** using *N*-4'-methylphenyl-2-chloropropanamide **S1** (4.00 g, 20 mmol), benzylmercaptan (2.85 ml, 24 mmol) and sodium (0.55 g, 24 mmol) in dry ethanol (80 ml). The crude sulfide **38** and dibenzyl disulfide were obtained in the ratio 1:0.02. Following purification by column chromatography on silica gel using hexane-ethyl acetate as eluent (gradient elution 2-10% ethyl acetate), the pure sulfide **38** (2.45 g, 43%)\* was isolated as a white solid, mp 69-71°C; (Found C, 71.20; H, 6.72; N, 4.90; S, 11.68. C<sub>17</sub>H<sub>19</sub>NOS requires C, 71.54; H, 6.71; N, 4.91; S, 11.23%);  $\nu_{\max}/\text{cm}^{-1}$  (KBr) 3298 (NH), 2924 (CH), 1656 (CO), 1602, 1515 (NH bend), 1495, 1372 (CN stretch);  $\delta_H$  (300 MHz) 1.51 [3H, d,  $J$  7.4, C(3)H<sub>3</sub>], 2.32 (3H, s, Ar-CH<sub>3</sub>), 3.42 [1H, q,  $J$  7.4, C(2)H], 3.77 (2H, s, SCH<sub>2</sub>), 7.09-7.50 (9H, m, ArH), 8.38 (1H, b s, NH);  $\delta_c$  (75.5 MHz) 18.9 [C(3)H<sub>3</sub>], 21.3 (Ar-CH<sub>3</sub>), 36.8 (SCH<sub>2</sub>), 45.5 [C(2)H], 120.9, 127.8, 129.2, 129.3, 129.9 (aromatic CH), 133.1, 134.0, 136.1 (aromatic C), 169.2 (CO);  $m/z$  308.1090 ([M+Na]<sup>+</sup>, C<sub>17</sub>H<sub>19</sub>NOSNa requires 308.1085), 286 [(M+H)<sup>+</sup>, 40%], 189 (2%), 130 (18%), 124 (20%), 108 (22%), 91 (2%), 82 (100%).

\* A yield of 57% was obtained on a batch that was prepared later.

### ***N*-4'-Methyl-2-(benzylthio)propanamide 39<sup>9</sup>**

This was synthesized following the procedure (Method A) described for **1** using *N*-methyl-2-chloropropanamide **S6** (2.96 g, 24 mmol), benzylmercaptan (3.44 ml, 29 mmol) and sodium (0.67 g, 29 mmol) in dry ethanol (70 ml) to give the crude sulfide **39** and dibenzyl disulfide in the ratio 1:0.12. Following purification by column chromatography on silica gel using hexane-ethyl acetate as eluent (gradient elution 20-50% ethyl acetate), the pure sulfide **39** (4.28 g, 85%) was isolated as a white solid, mp 60-61°C;  $\nu_{\max}/\text{cm}^{-1}$  (KBr) 3291 (NH), 2928 (NH), 1648 (CO) 1557 (NH bend), 1495, 1400 (CN stretch);  $\delta_H$  (300 MHz) 1.43 [3H, d,  $J$  7.4, C(3)H<sub>3</sub>], 2.74 (3H, d,  $J$

4.9,  $\text{CH}_3\text{NH}$ ), 3.31 [1H, q,  $J$  7.4,  $\text{C}(2)\text{H}$ ], 3.72 (1H, s,  $\text{SCH}_2$ ), 6.56 (1H, b s,  $\text{NH}$ ), 7.21-7.37 (5H, m,  $\text{ArH}$ ).

#### ***N*-Phenyl-2-(benzylthio)propanamide 40**

The title compound was synthesized according to the procedure (Method A) described for **1** using *N*-phenyl-2-chloropropanamide **S10** (4.00 g, 20 mmol), benzylmercaptan (3.07 ml, 26 mmol), and sodium (0.60 g, 26 mmol) in dry ethanol (70 ml) to give the crude sulfide **40** and dibenzyl disulfide in the ratio 1:0.07. Following purification by column chromatography on silica gel using hexane-ethyl acetate as eluent (gradient elution 5-40% ethyl acetate), the pure sulfide (3.72 g, 69%) was isolated as a white solid, mp 116-117°C; (Found C, 71.00; H, 6.38; N, 5.38; S, 11.98.  $\text{C}_{16}\text{H}_{17}\text{NOS}$  requires C, 70.81; H, 6.31; N, 5.16; S, 11.82%);  $\nu_{\text{max}}/\text{cm}^{-1}$  (KBr) 3301 (NH), 3061 (CH), 2973 (CH), 1660 (CO), 1600, 1532 (NH bend), 1499, 1372 (CN stretch);  $\delta_{\text{H}}$  (300 MHz) 1.53 [3H, d,  $J$  7.4,  $\text{C}(3)\text{H}_3$ ], 3.44 [1H, q,  $J$  7.4,  $\text{C}(2)\text{H}$ ], 3.78 (2H, s,  $\text{SCH}_2$ ), 7.12-7.36 (8H, m,  $\text{ArH}$ ), 7.47-7.54 (2H, m,  $\text{ArH}$ ), 8.42 (1H, b s,  $\text{NH}$ );  $\delta_{\text{C}}$  (75.5 MHz) 18.9 [ $\text{C}(3)\text{H}_3$ ], 36.8 ( $\text{SCH}_2$ ), 45.6 [ $\text{C}(2)\text{H}$ ], 120.0, 124.8, 127.8, 129.2, 129.3, 129.4 (aromatic CH), 137.5, 138.0 (aromatic C), 170.8 (CO);  $m/z$  (ESI) 272 [(M+H)<sup>+</sup>, 100%].

#### **2-(Benzylthio)propanamide 41<sup>10</sup>**

This was prepared following the procedure (Method A) described for **1** using 2-chloropropanamide **S11** (1.07 g, 9.9 mmol), benzylmercaptan (1.40 ml, 11.9 mmol) and sodium (0.27 g, 11.9 mmol) in dry ethanol (20 ml). The crude reaction mixture contained the crude sulfide **41** and dibenzyl disulfide in the ratio 1:0.03. Following purification by column chromatography on silica gel using hexane-ethyl acetate as eluent (gradient elution 20-40% ethyl acetate), the pure sulfide **41** (0.80 g, 41%) was isolated as a white solid, mp 93-94°C (Lit.,<sup>10</sup> 85-86°C); (Found C, 61.43; H, 6.58; N, 7.20; S, 16.55.  $\text{C}_{10}\text{H}_{13}\text{NOS}$  requires C, 61.50; H, 6.71; N, 7.17; S, 16.42%);  $\nu_{\text{max}}/\text{cm}^{-1}$  (KBr) 3370 (NH), 3192 (NH), 3030 (CH), 2974 (CH), 1635 (CO), 1600 (NH bend), 1494, 1403 (CN stretch);  $\delta_{\text{H}}$  (300 MHz) 1.46 [3H, d,  $J$  7.3,  $\text{C}(3)\text{H}_3$ ], 3.29 [1H, q,  $J$  7.3,  $\text{C}(2)\text{H}$ ], 3.77 (2H, s,  $\text{SCH}_2$ ), 5.38 (1H, b s, one of  $\text{NH}_2$ ), 6.45 (1H, b s, one of  $\text{NH}_2$ ), 7.19-7.41 (5H, m,  $\text{ArH}$ );  $\delta_{\text{C}}$  (75.5 MHz) 18.7 [ $\text{C}(3)\text{H}_3$ ], 36.6 ( $\text{SCH}_2$ ), 43.9

[C(2)H], 127.8, 129.1, 129.3 (aromatic CH), 137.7 (aromatic C), 175.7 (CO);  $m/z$  196 [(M+H)<sup>+</sup>, 100%], 91 (C<sub>7</sub>H<sub>7</sub><sup>+</sup>, 32%).

### Synthesis of the $\alpha$ -methylthioamides

#### 2-(Methylthio)-propionic acid **S16**<sup>12</sup>

Thiolactic acid (89.0 ml, 106.0 g, 1 mol) was added slowly to a solution of NaOH (80 g, 2 mol) in water (250 ml). The resulting mixture was treated dropwise during 10 min with methyl iodide (63.0 ml, 1 mol) and stirring was continued for 16 h at room temperature. The mixture was diluted with water (200 ml) and dichloromethane (200 ml), the layers were separated and the aqueous phase was extracted with dichloromethane (3 x 75 ml). The combined organic layers were washed with brine (200 ml) and dried to afford a colourless liquid **S16** (96.12 g, 81%), which required no further purification;  $\delta_H$  (300 MHz) 1.46 [3H, d,  $J$  7.1, C(3)H<sub>3</sub>], 2.22 (3H, s, SCH<sub>3</sub>), 3.37 [1H, q,  $J$  7.1, C(2)H].

#### *N*-4'-Fluorophenyl-2-(methylthio)propionamide **42**

A solution of 2-(methylthio)propionic acid **S16** (15.00 g, 125 mmol) in dichloromethane (120 ml) was treated dropwise with thionyl chloride (18.2 ml, 250 mmol) followed by DMF (5 drops). Gas evolution began immediately and the mixture was stirred at ambient temperature for 18 h, after which the volatiles were removed under reduced pressure. The residue was dissolved in dichloromethane (200 ml) and cooled to 0 °C whereupon 4-fluoroaniline (24.00 ml, 250 mmol) was added with vigorous stirring. After 10 min the cooling bath was removed and stirring was continued for 16 h at room temperature. The mixture was diluted with water (200 ml), separated, and the aqueous phase extracted with dichloromethane (2 x 200 ml). The combined organic layers were extracted with HCl (2M, 200 ml) and brine (200 ml) and dried to give the sulfide **42** (25.20 g, 95%) as a pink solid, which was used without further purification, mp 84-86 °C; (Found C, 56.28; H, 5.72; N, 6.54; S, 14.60; F, 8.78. C<sub>10</sub>H<sub>12</sub>FNOS requires C, 56.32; H, 5.67; N, 6.57; S, 15.03; F, 8.91%);  $\nu_{\max}/\text{cm}^{-1}$  (KBr) 3258 (NH), 1658 (CO), 1509, 882;  $\delta_H$  (300 MHz) 1.54 [3H, d,  $J$  6.0, C(3)H<sub>3</sub>], 2.10 (3H, s, SCH<sub>3</sub>), 3.43 [1H, q,  $J$  7.4, C(2)H], 6.95-7.09 [2H, m, C(3')H], 7.48-7.61 [2H, m, C(2')H], 8.61 (1H, b s, NH);  $\delta_c$  (75.5 MHz) 14.1 (SCH<sub>3</sub>), 17.8 [C(3)H<sub>3</sub>], 46.2 [C(2)H], 115.7 [d,  $^2J_{\text{CF}}$  23, ArC(3')], 121.5 [d,  $^3J_{\text{CF}}$  8, ArC(2')], 133.7

[d,  $^4J_{\text{CF}}$  3, ArC(1')], 159.4 [d,  $^1J_{\text{CF}}$  244, ArC(4')], 170.4 (CO);  $m/z$  213 ( $\text{M}^+$ , 25%), 167 (60), 75 ( $\text{M}^+$  - CONHAr).

### ***N*-Benzyl-2-(methylthio)propionamide 43**

The title compound was prepared using the procedure described for **42** using 2-(methylthio)propionic acid **S16** (4.80 g, 40.0 mmol), thionyl chloride (5.78 ml, 80.0 mmol) and DMF (5 drops) in dichloromethane (100 ml). The crude acid chloride was then treated with benzylamine (9.00 g, 80.0 mmol) in dichloromethane (180 ml). The reaction mixture was stirred for 16 h before work-up as described for **42** gave the amide **43** as a white solid (7.50 g, 90%), which was used without further purification, mp 58-61 °C; (Found C, 63.17; H, 7.14; N, 6.64; S, 15.36.  $\text{C}_{11}\text{H}_{15}\text{NOS}$  requires C, 63.12; H, 7.22; N, 6.69; S, 15.32%);  $\nu_{\text{max}}/\text{cm}^{-1}$  (KBr) 3290 (NH), 1651 (CO), 1548, 1213, 1028;  $\delta_{\text{H}}$  (300 MHz) 1.57 [3H, d,  $J$  7.3, C(3) $\text{H}_3$ ], 2.07 (3H, s,  $\text{SCH}_3$ ), 3.37 [1H, q,  $J$  7.3, C(2) $\text{H}$ ], 4.41 (2H, d,  $J$  6.8,  $\text{NCH}_2$ ), 6.90 (1H, b s, NH), 7.21-7.41 (10H, m, ArH);  $\delta_{\text{C}}$  (75.5 MHz) 14.6 ( $\text{SCH}_3$ ), 18.4 [C(3) $\text{H}_3$ ], 44.1 ( $\text{CH}_2\text{NH}$ ), 45.9 [C(2) $\text{H}$ ], 128.0, 128.1, 129.2 (aromatic CH), 138.6 (quaternary aromatic C), 172.5 (CO);  $m/z$  209.08841 ( $\text{M}^+$ ,  $\text{C}_{11}\text{H}_{15}\text{NOS}$  requires 209.08744). 209 ( $\text{M}^+$ , 25%), 163 (80), 91 (95), 75 (100).

### ***N*-*n*-Butyl-2-(methylthio)propionamide 44**

The title compound was prepared using the procedure described for **42** using 2-(methylthio)propionic acid **S16** (8.00 g, 66.7 mmol), thionyl chloride (9.69 ml, 133.3 mmol) and DMF (5 drops) in dichloromethane (180 ml). The crude acid chloride was then treated with butylamine (7.31 g, 133.3 mmol) in dichloromethane (160 ml). The reaction mixture was stirred for 16 h before work-up as described for **42** gave the amide **63** as a yellow oil. Purification by column chromatography on silica gel using ethyl acetate-hexane (20:80) as eluent gave the amide **44** as a clear oil (8.63 g, 73%), (Found C, 54.32; H, 9.74; N, 7.90; S, 18.20.  $\text{C}_8\text{H}_{17}\text{NOS}$  requires C, 54.80; H, 9.78; N, 7.99; S, 18.29%);  $\nu_{\text{max}}/\text{cm}^{-1}$  (film) 1646 (CO), 1533, 1210, 1073;  $\delta_{\text{H}}$  (300 MHz) 0.93 [3H, t,  $J$  7.3, C(4') $\text{H}_3$ ], 1.22-1.59 [7H, m, includes C(3') $\text{H}_2$ , C(2') $\text{H}_2$  and C(3) $\text{H}_3$ ], 2.08 (3H, s,  $\text{SCH}_3$ ), 3.21-3.39 [3H, m,  $\text{CH}_2\text{NH}$  and C(2) $\text{H}$ ], 6.95 (1H, b s, NH);  $\delta_{\text{C}}$  (75.5 MHz) 14.0 [C(4') $\text{H}_3$ ], 14.2 ( $\text{SCH}_3$ ), 18.0 [C(3) $\text{H}_3$ ], 20.3 [C(3') $\text{H}_2$ ], 31.9 [C(2') $\text{H}_2$ ],

39.6 (CH<sub>2</sub>N), 45.1 [C(2)H], 172.5 (CO); *m/z* 175.10321 (M<sup>+</sup>, C<sub>8</sub>H<sub>17</sub>NOS requires 175.10308). 175 (M<sup>+</sup>, 2%), 100 (20), 75 (100).

#### ***N*-Isopropyl-2-(methylthio)propionamide 45**

The title compound was prepared using the procedure described for **42** using 2-(methylthio)propionic acid **S16** (5.06 g, 42.16 mmol), thionyl chloride (6.10 ml, 84.33 mmol) and DMF (5 drops) in dichloromethane (100 ml). The crude acid chloride was then treated with isopropylamine (7.30 ml, 84.33 mmol) in dichloromethane (180 ml). The reaction mixture was stirred for 16 h before work-up as described for **42** gave the amide **45** as a yellow oil. Purification by column chromatography on silica gel using ethyl acetate-hexane (20:80) as eluant gave the amide **45** as a white solid (5.60 g, 84%), mp 89-91 °C; (Found C, 52.10; H, 9.09; N, 8.42; S, 20.19. C<sub>7</sub>H<sub>15</sub>NOS requires C, 52.13; H, 9.38; N, 8.62; S, 19.88%); *v*<sub>max</sub>/cm<sup>-1</sup> (KBr) 3777 (NH), 1639 (CO), 1260, 764; *δ*<sub>H</sub> (300 MHz) 1.17 [3H, t, *J* 6.6, one of CH(CH<sub>3</sub>)<sub>2</sub>], 1.18 [3H, t, *J* 6.6, one of CH(CH<sub>3</sub>)<sub>2</sub>], 1.45 [3H, d, *J* 7.3, C(3)H<sub>3</sub>], 2.08 (3H, s, SCH<sub>3</sub>), 3.29 [1H, q, *J* 7.3, C(2)H], 3.98-4.16 [1H, m, NCH(CH<sub>3</sub>)<sub>2</sub>], 6.67 (1H, bs, NH); *δ*<sub>c</sub> (75.5 MHz) 14.2 (SCH<sub>3</sub>), 18.0 [C(3)H<sub>3</sub>], 22.6 [one of CH(CH<sub>3</sub>)<sub>2</sub>], 22.7 [one of CH(CH<sub>3</sub>)<sub>2</sub>], 41.5 [C(2)H], 45.6 [CH(CH<sub>3</sub>)<sub>2</sub>], 171.1 (CO); *m/z* 161 (M<sup>+</sup>, 5%), 115 (78), 75 (100).

#### ***N*-Methyl-2-(methylthio)propionamide 135<sup>11</sup>**

The title compound was prepared using the procedure described for **42** using 2-(methylthio)propionic acid **S16** (5.00 g, 41.60 mmol), thionyl chloride (5.96 ml, 83.20 mmol) and DMF (5 drops) in dichloromethane (100 ml). The crude acid chloride was then treated with aqueous methylamine (40 ml, 83.20 mmol) in dichloromethane (60 ml). The reaction mixture was stirred for 16 h before work-up as described for **42** gave the amide **135** as a colourless solid (3.77 g, 68%), which was used without further purification, mp 44-46 °C; *v*<sub>max</sub>/cm<sup>-1</sup> (KBr) 3089, 2972, 1651 (CO), 1562, 1449, 1372; *δ*<sub>H</sub> (300 MHz) 1.47 [3H, d, *J* 7.3, C(3)H<sub>3</sub>], 2.09 (3H, s, SCH<sub>3</sub>), 2.81 (3H, d, *J* 4.3, NCH<sub>3</sub>), 3.33 [1H, q, *J* 7.3, C(2)H], 6.82 (1H, bs, NH).

Spectral characteristics were consistent with previously reported data.<sup>11</sup>

#### ***N*-4'-Methylphenyl-2-(methylthio)propionamide 46**

A solution of DCC (1.89 g, 9.16 mmol) and DMAP (catalytic amount) in DCM (20 ml) was slowly added to a solution of *p*-toluidine (0.98 g, 9.16 mmol) in DCM (20 ml) at 0°C. A solution of 2-(methylthio)-propionic acid **S16** (1.00 g, 8.33 mmol) in DCM (20 ml) was added dropwise. The resulting solution was stirred for 10 minutes at 0°C before the ice bath was removed. The reaction was stirred at room temperature for 16 hours when most of the DCU by-product was removed by filtration of the reaction mixture through celite. The filtrate was washed with HCl (1N, 100 ml), saturated NaHCO<sub>3</sub> (100 ml) and brine (100 ml), dried and concentrated at reduced pressure to give **46** which was purified by chromatography on silica gel using ethyl acetate-hexane (gradient elution: 10 to 20% ethyl acetate) as eluent to give the amide **46** as a colourless solid (1.77 g, 102%) containing *ca.* 5% DCU (as estimated by <sup>1</sup>H NMR); δ<sub>H</sub> (270 MHz) 1.51 [3H, d, *J* 7, C(3)H<sub>3</sub>], 2.14 (3H, s, ArCH<sub>3</sub> or SCH<sub>3</sub>), 2.33 (3H, s, ArCH<sub>3</sub> or SCH<sub>3</sub>), 3.45 [1H, q, *J* 7, C(2)H], 7.10-7.48 (4H, ABq, *J* 7, ArH), 8.55 (1H, b s, NH); δ<sub>C</sub> (67.8 MHz) 14.0 [C(3)H<sub>3</sub> or SCH<sub>3</sub>], 17.7 [C(3)H<sub>3</sub> or SCH<sub>3</sub>], 20.8 (ArCH<sub>3</sub>), 46.2 [C(2)H], 119.7, 129.4 (aromatic CH), 134.0, 135.1 (quaternary aromatic C), 170.1 (CO); *m/z* 209.0885 (M<sup>+</sup>, C<sub>11</sub>H<sub>15</sub>NOS requires 209.0874). 209 (M<sup>+</sup>, 9%), 163 (16), 134 (4, [CONHTol]<sup>+</sup>), 84 (77), 75 (22, M<sup>+</sup>-CONHTol), 49 (100).

### 2-(Methylthio)propionamide **136**

A solution of 2-(methylthio)propionic acid **S16** (0.52g, 4.16 mmol) in dichloromethane (10ml) was treated dropwise with thionyl chloride (0.45ml, 6.24 mmol) followed by DMF (2 drops). Gas evolution began immediately and the mixture was stirred at ambient temperature for 18 h, after which the volatiles were removed under reduced pressure. The residue was dissolved in acetone (10ml) and cooled to 0°C whereupon ammonia (35%, 0.45 ml, 8.32 mmol) was added with vigorous stirring. After 10 min the cooling bath was removed and stirring was continued for 16 h at room temperature. The acetone and excess ammonia were removed by distillation at reduced pressure. The resulting residue was taken up in DCM (20 ml) and water (20 ml) was added. The phases were separated, and the aqueous phase extracted with dichloromethane (2 x 20ml). The combined organic layers were extracted with HCl (2M, 20ml) and then brine (20ml), dried and concentrated to give the sulfide **136** (0.38g, 76%) as a white solid; δ<sub>H</sub> (300 MHz) 1.49 (3H, d, *J* 6.0, C(3)H<sub>3</sub>), 2.14 (3H, s,

SCH<sub>3</sub>), 3.32 (1H, q, *J* 7.3, C(2)*H*), 6.86 (1H, bs, NH), 7.04 (1H, bs, NH), 8.61 (1H, bs, NH);

Despite repeated attempts it was not possible to completely remove the DMF from this sulfide.

### ***N,N*-Diethyl-2-(methylthio)propionamide **137****

The title compound was prepared using the procedure described for **42** using 2-(methylthio)propionic acid **S16** (8.00 g, 66.66 mmol), thionyl chloride (9.54 ml, 133.33 mmol) and DMF (5 drops) in dichloromethane (100 ml). The crude acid chloride was then treated with diethylamine (13.71 ml, 133.33 mmol) in dichloromethane (80 ml). The reaction mixture was stirred for 16 h before work-up as described for **42** gave the amide **137** as a yellow oil. Purification by column chromatography on silica gel using ethyl acetate-hexane (10:90) as eluant gave the amide **137** as a clear oil (7.60 g, 66%);  $\nu_{\max}/\text{cm}^{-1}$  (film) 2927 (NH), 1640 (CO), 1221, 1017;  $\delta_{\text{H}}$  (300 MHz) 1.15 (3H, t, *J* 7.1, one of CH<sub>2</sub>CH<sub>3</sub>), 1.23 (3H, t, *J* 7.1, one of CH<sub>2</sub>CH<sub>3</sub>), 1.44 [3H, d, *J* 7.3, C(3)*H*<sub>3</sub>], 2.08 (3H, s, SCH<sub>3</sub>), 3.18-3.41 (2H, m, one of CH<sub>2</sub>CH<sub>3</sub>), 3.49-3.71 [3H, m, contains one of CH<sub>2</sub>CH<sub>3</sub> and C(2)*H*];  $\delta_{\text{C}}$  (75.5 MHz) 11.5 (one of CH<sub>2</sub>CH<sub>3</sub>), 13.0 (one of CH<sub>2</sub>CH<sub>3</sub>), 14.8 (SCH<sub>3</sub>), 17.3 [C(3)*H*<sub>3</sub>], 37.3 [C(2)*H*], 40.5 (one of CH<sub>2</sub>CH<sub>3</sub>), 42.0 (one of CH<sub>2</sub>CH<sub>3</sub>), 170.2 (CO); *m/z* (EI) 176.11120 (M<sup>+</sup>, C<sub>8</sub>H<sub>18</sub>SNO requires 176.11108). 176 (M<sup>+</sup> + 1, 100%), 129 (40), 100 (50).

### **Synthesis of extended chain $\alpha$ -thioamides**

#### **2-Bromobutanoyl chloride **142****

##### Method F

A solution of 2-bromobutanoic acid **138**<sup>3</sup> (3.02 g, 18.1 mmol) in DCM (20 ml) was stirred at 0 °C. Oxalyl chloride (2.53 g, 19.9 mmol) was added dropwise. DMF (5 drops) was added as a catalyst. The reaction mixture was allowed to warm to RT and stirred for a further 5 h until gas evolution had ceased. The DCM was concentrated to give 2-bromobutanoyl chloride **142** (2.46 g, 73 % crude) as a white solid which was used without further purification;  $\nu_{\max}/\text{cm}^{-1}$  (film) 1795 (CO acid chloride).

##### Method G

Thionyl chloride (25.29 g, 0.22 mol) was stirred with 2-bromobutanoic acid **138**<sup>3</sup>

(7.10 g, 0.04 mol) while heating at reflux for 1 h until evolution of SO<sub>2</sub> and HCl gases had ceased. The product mixture was cooled to RT, toluene (4 x 20 ml) was added and evaporated portionwise to azeotropically remove the excess thionyl chloride. *Note:* It is important not to heat the product mixture above 40 °C as the acid chloride will evaporate. 2-Bromobutanoyl chloride **142** (5.02 g, 64 %) was obtained as a colourless oil due to the presence of < 5 % thionyl chloride) which was used without further purification;

$\nu_{\text{max}}/\text{cm}^{-1}$  (film) 1795 (acid chloride).

### 2-Bromopentanoyl chloride **143**

This was prepared following the procedure (Method F) described for  $\alpha$ -bromobutanoyl chloride **142** using 2-bromopentanoic acid **139**<sup>3</sup> (5.00 g, 27.6 mmol), oxalyl chloride (3.86 g, 30.4 mmol), DCM (35 ml) and DMF (3 drops) to give the acid chloride **143** as a brown solid in quantitative yield, which was used without further purification;  $\nu_{\text{max}}/\text{cm}^{-1}$  (film) 1783 (CO acid chloride).

### 2-Bromo-3-phenylpropanoyl chloride **144**

This was prepared following the procedure described for  $\alpha$ -bromobutanoyl chloride (method G) using 2-bromo-3-phenylpropanoic acid **140**<sup>2</sup> (1.00 g, 4.4 mmol), thionyl chloride (1.3 ml, 17.5 mmol), carbon tetrachloride (2 ml) to give 2-bromo-3-phenylpropanoyl chloride **144** (0.95 g, 83 %) as a pale yellow oil which was used without further purification;  $\nu_{\text{max}}/\text{cm}^{-1}$  (film) 1783 (CO acid chloride).

### N-4'-Methylphenyl-2-bromobutanamide **145**

2-Bromobutanoyl chloride **142** (2.46 g, 18.1 mmol) was dissolved in DCM (25 ml) and stirred at RT. *p*-Toluidine (2.90 g, 27.1 mmol) was added portionwise over 15 mins as the reaction was exothermic. The reaction mixture was stirred for 25 h, then quenched with water (40 ml), the layers were separated and the organic layer washed with sodium bicarbonate (2 x 20ml). The aqueous layer was extracted with DCM (2 x 10 ml) and the combined organic layers were washed with water (2 x 20ml) and brine (2 x 20 ml), dried and concentrated to give the  $\alpha$ -bromoamide **145** as a brown solid (4.20 g, 91 % crude) which was used without further purification;  $\delta_{\text{H}}$  (60 MHz) 1.01 [3H, t, *J* 7, C(4)H<sub>3</sub>], 1.76-2.40 [2H, m, C(3)H<sub>2</sub>], 2.25 (3H, s, ArCH<sub>3</sub>), 4.13-4.43 (1H,

dd, *J* 6, 7, *CHBr*), 6.82-7.45 (4H, m, *ArH*), 8.05 (1H, br s, *NH*).

#### ***N*-4'-Methylphenyl-2-bromopentanamide 146**

This was prepared following the procedure described for amide **S8** using 2-bromopentanoylchloride **143** (7.45 g, 27.6 mmol), *p*-toluidine (4.43 g, 41.4 mmol) and DCM (50 ml) to give *N*-4'-methylphenyl-2-bromopentanamide **146** (6.32 g, 85 %) as a light brown solid;  $\delta_{\text{H}}$  (60 MHz) 0.90 [3H, t, *J* 7, C(5)*H*<sub>3</sub>], 1.43 [2H, q, *J* 7, C(4)*H*<sub>2</sub>], 1.82-2.24 [2H, m, C(3)*H*<sub>2</sub>], 2.25 (3H, s, *ArCH*<sub>3</sub>), 4.43 (1H, dd, *J* 6, 7, *CHBr*), 6.87-7.50 (4H, m, *ArH*), 8.63 (1H, br s, *NH*).

#### **(*S*)-*N*-1'-Phenylmethyl-2-bromopentanamide 147**

This was prepared following the procedure described for amide **S1** using 2-bromopentanoyl chloride **143** (4.40 g, 20.7 mmol), (*S*)-1-phenylethylamine (2.76 g, 22.8 mmol), triethylamine (3.2 ml, 22.8 mmol) in DCM (100 ml) to give the amide **147** (5.31 g, 94 % an equimolar mixture of diastereomers) as an off-white solid which was used without further purification;  $\nu_{\text{max}}/\text{cm}^{-1}$  (KBr) 3276 (br *NH*), 1643 (CO amide);  $\delta_{\text{H}}$  (60 MHz) 0.86-0.97 [3H, m, C(5)*H*<sub>3</sub>], 1.41-1.49 [5H, m, C(4)*H*<sub>2</sub> and C(2')*H*<sub>3</sub>], 1.91-1.99 [2H, m, C(3)*H*<sub>2</sub>], 4.20 (1H, m, *CHBr*), 4.85-5.10 [1H, m, C(1')*H*], 6.50 (1H, br s, *NH*), 7.03-7.40 (5H, m, *ArH*).

#### ***N*-4'-Methylphenyl-2-bromo-3-phenylpropanamide 148**

This was prepared following the procedure described for amide **S8** using 2-bromo-3-phenylpropanoyl chloride **144** (6.00 g, 24.3 mmol), *p*-toluidine (3.66 g, 34.2 mmol) and DCM (50 ml) to give *N*-4'-methylphenyl-2-bromo-3-phenylpropanamide **148** (6.60 g, 85 %) as a light brown solid which was used without further purification;  $\delta_{\text{H}}$  (60 MHz) 2.40 (3H, s, *ArCH*<sub>3</sub>), 3.49, 3.53 [2H, d, *J* 6, 8, C(3)*H*<sub>2</sub>], 4.63, 4.65 (1H, d, *J* 6, 8, *CHBr*), 7.00- 7.37 (9H, m, *ArH*), 7.87 (1H, br s, *NH*).

#### ***N*-4'-Methylphenyl-2-bromo-3-methylbutanamide 149**

A solution of DCC (1.00 g, 4.9 mmol) in DCM (10 ml) at 0 °C was added slowly to a stirred solution of *p*-toluidine (0.52 g, 4.9 mmol) in DCM (10 ml) also at 0 °C. A solution of 3-methyl-2-bromobutanoic acid **141** (0.81 g, 4.4 mmol) in DCM (10 ml) at

0 °C was added dropwise over 10 min. The reaction mixture was removed from the ice bath and allowed to warm slowly to room temperature, stirring was continued for 2 h. Most of the DCU by-product was removed by filtration of the reaction mixture through celite. The filtrate was washed with aqueous HCl (1 N, 10 ml), aqueous sodium bicarbonate (20 ml), brine (2 x 10 ml), dried and evaporated to give *N*-4'-methylphenyl-2-bromo-3-methylbutanamide **149** (0.88 g, 74 %) containing *ca.* 9 % DCU (as estimated by <sup>1</sup>H NMR) as a light yellow solid which was used without further purification; δ<sub>H</sub> (60 MHz) 1.08, 1.10 [2 x 3H, 2 x d, *J* 7, 7, CH(CH<sub>3</sub>)<sub>2</sub>], 2.17-2.56 [1H, m, C(3)*H*], 2.25 (3H, s, ArCH<sub>3</sub>), 4.34 (1H, d, *J* 6, CHBr), 6.97-7.45 (5H, ABq, *J* 8, Ar*H*), 8.30 (1H, br s, NH).

#### ***N*-4'-Methylphenyl-2-bromo-3-methylbutanamide 150**

A solution of DCC (1.00 g, 4.9 mmol) in DCM (10 ml) at 0 °C was added slowly to a stirred solution of *p*-toluidine (0.52 g, 4.9 mmol) in DCM (10 ml) also at 0 °C. A solution of 3-methyl-2-bromobutanoic acid **141** (0.81 g, 4.4 mmol) in DCM (10 ml) at 0 °C was added dropwise over 10 min. The reaction mixture was removed from the ice bath and allowed to warm slowly to room temperature, stirring was continued for 2 h. Most of the DCU by-product was removed by filtration of the reaction mixture through celite. The filtrate was washed with aqueous HCl (1 N, 10 ml), aqueous sodium bicarbonate (20 ml), brine (2 x 10 ml), dried and evaporated to give *N*-4'-methylphenyl-2-bromo-3-methylbutanamide **150** (0.88 g, 74 %) containing *ca.* 9 % DCU (as estimated by <sup>1</sup>H NMR) as a light yellow solid which was used without further purification; δ<sub>H</sub> (60 MHz) 1.08, 1.10 [2 x 3H, 2 x d, *J* 7, 7, CH(CH<sub>3</sub>)<sub>2</sub>], 2.17-2.56 [1H, m, C(3)*H*], 2.25 (3H, s, ArCH<sub>3</sub>), 4.34 (1H, d, *J* 6, CHBr), 6.97-7.45 (5H, ABq, *J* 8, Ar*H*), 8.30 (1H, br s, NH).

#### ***N*-4'-Methylphenyl-2-(phenylthio)butanamide 47**

This was prepared following the procedure (Method A) described for sulfide **1** using *N*-4'-methylphenyl-2-bromobutanamide **145** (2.11 g, 8.20 mmol), thiophenol (1.00 ml, 9.84 mmol), sodium (0.27 g, 9.84 mmol) and dry ethanol (20 ml) to give the product **47** (2.13 g, 91 %) as a colourless solid which was used without further purification, mp 81-83 °C; (Found C, 71.43; H, 6.64; N, 4.95; S, 10.92. C<sub>17</sub>H<sub>19</sub>NOS

requires C, 71.43; H, 6.71; N, 4.91; S, 11.23%);  $\nu_{\max}/\text{cm}^{-1}$  3286 (br NH), 1676, 1656 (CO amide);  $\delta_{\text{H}}$  (270 MHz) 1.14 (3H, t,  $J$  7, C(4)H<sub>3</sub>), 1.80-2.04 (1H, m, one of C(3)H<sub>2</sub>), 2.05-2.28 (1H, m, one of C(3)H<sub>2</sub>), 2.29 (3H, s, ArCH<sub>3</sub>), 3.75 (1H, dd,  $J$  7, 7, C(2)H), 7.04-7.45 (9H, m, ArH), 8.75 (1H, br s, NH);  $\delta_{\text{C}}$  (67.8 MHz) 12.0 [C(4)H<sub>3</sub>], 20.8 (ArCH<sub>3</sub>), 25.9 [C(3)H<sub>2</sub>], 55.5 [C(2)H], 120.0, 127.4, 129.3, 129.4, 130.9 (aromatic CH), 133.7, 134.2, 134.9 (quaternary aromatic C), 169.4 (CO).

#### ***N*-4'-Methylphenyl-2-(phenylthio)pentanamide 48**

This was prepared following the procedure (Method C) described for sulfide **15** using *N*-4'-methylphenyl-2-bromopentanamide **146** (2.98 g, 11.1 mmol), thiophenol (1.3 ml, 12.2 mmol), sodium (0.56 g, 24.4 mmol) and dry ethanol (70 ml). The sulfide **48**, formed quantitatively, was purified by chromatography using ethyl acetate-hexane (7:93) as eluent to give *N*-4'-methylphenyl-2-(phenylthio)pentanamide **48** (3.01 g, 91 %) as a white, crystalline solid, mp 82-3 °C; (Found C, 72.36; H, 7.11; N, 4.74, S, 10.56. C<sub>18</sub>H<sub>21</sub>NOS requires C, 72.20; H, 7.07; N, 4.68; S, 10.71%);  $\nu_{\max}/\text{cm}^{-1}$  3281 (br NH), 1652, 1602 (CO amide);  $\delta_{\text{H}}$  (300 MHz) 0.98 [3H, t,  $J$  7, C(5)H<sub>3</sub>], 1.50-1.69 [2H, m, C(4)H<sub>2</sub>], 1.65-1.95 [1H, m, C(3)H<sub>A</sub>H<sub>B</sub>], 1.98-2.15 [1H, m, C(3)H<sub>A</sub>H<sub>B</sub>], 2.30 (3H, s, ArCH<sub>3</sub>), 3.70-3.80 [1H, m, C(2)H], 7.05-7.44 (9H, m, ArH), 8.38 (1H, br s, NH);  $\delta_{\text{C}}$  (270 MHz) 13.7 [C(5)H<sub>3</sub>], 20.7 [C(4)H<sub>2</sub>], 20.8 (ArCH<sub>3</sub>), 34.6 [C(3)H<sub>2</sub>], 53.7 [C(2)H], 120.0, 127.4, 129.3, 129.4, 130.5 (aromatic CH), 133.8, 134.2, 134.9 (quaternary aromatic C), 169.5 (CO).

#### **(1'S)-*N*-1'-Phenylethyl-2-phenylthiopentanamide 49**

This was prepared using (1'S)-*N*-1'-phenylmethyl-2-bromopentanamide **147** (4.00 g, 14.7 mmol), thiophenol (1.7 ml, 16.2 mmol), sodium (1.03 g, 23.0 mmol), and dry ethanol (65 ml) (Method H) to give the crude sulfide (4.29 g, 99 %) as an off-white solid. Purification by trituration using hexane gave the sulfide **49** (3.51 g, 80 % as an equimolar mixture of diastereomers) as a white, crystalline solid, mp 70-73 °C; -5.46 (c 8.0 in ethanol); (Found C, 72.46; H, 7.31; N, 4.46; S, 10.16. C<sub>19</sub>H<sub>23</sub>NOS requires C, 72.80; H, 7.40; N, 4.47; S, 10.23%);  $\nu_{\max}/\text{cm}^{-1}$  (KBr) 3277 (br NH), 1642 (CO amide);  $\delta_{\text{H}}$  (as a mixture of diastereomers) (270 MHz) 0.93, 0.96 [3H, t,  $J$  8, 7, C(5)H<sub>3</sub>], 1.31, 1.42 [3H, d,  $J$  7, 7, C(2')H<sub>3</sub>], 1.39-1.47 [2H, m, C(4)H<sub>2</sub>], 1.67-1.92

[1H, m, one of C(3)H<sub>2</sub>], 1.95-1.99 [1H, m, one of C(3)H<sub>2</sub>], 3.75 [1H, t, *J* 6, C(2)H], 4.97-5.10 [1H, m, C(1')H], 7.01-7.32 (10H, m, ArH);  $\delta_{\text{C}}$  (67.8 MHz) 13.7 [C(5)H<sub>3</sub>], 20.7, 20.9 [C(4)H<sub>2</sub>], 21.5, 21.6 [C(2')H<sub>3</sub>], 34.6, 34.8 [C(3)H<sub>2</sub>], 48.9 [C(1')H], 52.7, 52.8 [C(2)H], 126.0, 126.1, 127.0, 127.1, 127.2, 127.4, 128.5, 128.7, 129.7, 130.1, 130.2 (aromatic CH), 142.8, 143.0 (quaternary aromatic C), 170.4 (CO); *m/z* 313 (M<sup>+</sup>, 17 %), 271 (10), 204 (79, M<sup>+</sup> - PhS), 165 (40, M<sup>+</sup> - CONHR), 105 (100, [CHCH<sub>3</sub>Ph]<sup>+</sup>).

#### ***N*-4'-Methylphenyl-2-(phenylthio)-3-phenylpropanamide 50**

This was prepared following the procedure (Method C) described for sulfide **15** using amide **148** (6.50 g, 20.4 mmol), thiophenol (2.31 ml, 22.5 mmol), sodium (1.03 g, 45.0 mmol) and dry ethanol (120 ml) to give the crude sulfide **50** (5.98 g, 85 %). Purification by chromatography of a 1.00 g portion using ethyl acetate-hexane (5:95) as eluent gave pure *N*-4'-methylphenyl-2-(phenylthio)-3-phenylpropanamide **50** (0.67 g, 57 %) as an off-white, crystalline solid, mp 157-158 °C; (Found C, 75.99; H, 6.18; N, 3.99; S, 9.25. C<sub>22</sub>H<sub>21</sub>NOS requires C, 76.05; H, 6.09; N, 4.03; S, 9.23%);  $\nu_{\text{max}}/\text{cm}^{-1}$  (KBr) 3228 (br NH), 1645, 1593 (CO amide);  $\delta_{\text{H}}$  (270 MHz) 2.30 (3H, s, ArCH<sub>3</sub>), 3.18 [1H, dd, *J* 7, 7, C(3)H<sub>A</sub>H<sub>B</sub>], 3.45 [1H, dd, *J* 7, 7, C(3)H<sub>A</sub>H<sub>B</sub>], 4.04 (1H, dd, *J* 7, 7, C(2)H], 7.04-7.39 (14H, m, ArH), 8.14 (1H, br s, NH);  $\delta_{\text{C}}$  (67.8 MHz) 20.95 (ArCH<sub>3</sub>), 38.5 [C(3)H<sub>2</sub>], 55.5 [C(2)H], 120.2, 127.0, 127.9, 128.5, 129.5, 131.3 (aromatic CH), 133.5, 134.4, 134.1, 137.6 (quaternary aromatic C), 168.0 (CO).

#### ***N*-4'-Methylphenyl-3-methyl-2-(phenylthio)butanamide 151**

This was prepared following the procedure (Method C) described for sulfide **15** using *N*-4'-methylphenyl-2-bromo-3-methylbutanamide **149** (2.65 g, 9.8 mmol), sodium (0.46 g, 20.1 mmol), thiophenol (1.1 ml, 10.8 mmol) and ethanol (50 ml). Purification by trituration from ether gave *N*-4'-methylphenyl-3-methyl-2-(phenylthio)butanamide **151** (0.73 g, 25 %) as a white solid. On a larger scale (37 mmol of amide **147**) preparation the yield of sulfide **151** was 48 %; mp 120-123 °C; (Found C, 71.98; H, 6.90; N, 4.83; S, 10.22. C<sub>18</sub>H<sub>21</sub>NOS requires C, 72.20; H, 7.07; N, 4.68; S, 10.71%);  $\nu_{\text{max}}/\text{cm}^{-1}$  (KBr) 3246 (br NH), 1655 (CO amide);  $\delta_{\text{H}}$  (270 MHz) 1.13, 1.19 [2 x 3H, 2 x d, *J* 7, 7, (CH<sub>3</sub>)<sub>2</sub>C(3)H], 2.30 (3H, s, ArCH<sub>3</sub>), 2.42-2.54 [1H, m, C(3)H], 3.70 [1H, d, *J* 6, C(2)H], 7.09-7.19 (9H, m, ArH), 8.60 (1H, br s, NH);  $\delta_{\text{C}}$

(67.8 MHz) 19.6 [one of (CH<sub>3</sub>)<sub>2</sub>C(3)H], 20.8 (ArCH<sub>3</sub>), 21.2 [one of (CH<sub>3</sub>)<sub>2</sub>C(3)H], 31.6 [C(3)H], 61.9 [C(2)H], 120.1, 127.2, 129.5, 129.9, 130.2 (aromatic CH), 134.8, 134.3, 134.2 (quaternary aromatic C), 169.1 (CO); *m/z* 299 (M<sup>+</sup>, 30%), 165 (40, [(CH<sub>3</sub>)<sub>2</sub>CHCHSPh]<sup>+</sup>), 134 (12, [CONHTol]<sup>+</sup>).

### Preparation of β-chloroacrylamides

#### *N*-4'-Methylphenyl-*Z*-3-chloro-2-(phenylthio)propenamide **3**

##### Method A

Unrecrystallised NCS (5.57 g, 41.73 mmol) was added in one portion to a solution of the sulfide **1** (5.80 g, 21.40 mmol) in toluene (116 ml). The flask was immediately immersed in an oil bath at 90°C and heating was maintained for 3.5 h with stirring. The reaction mixture was cooled to 0°C and the succinimide by-product removed by filtration. The solvent was evaporated at reduced pressure to give the β-chloroacrylamide **3** as an off-white solid. The crude product was purified by chromatography on silica gel using ethyl acetate-hexane (20:80) as eluent to give the β-chloroacrylamide **3** as a colourless solid (5.93 g, 91 %), mp 110-111 °C; (Found C, 63.34, H, 4.69; Cl, 11.98; N, 4.34; S, 10.24. C<sub>16</sub>H<sub>14</sub>ClNOS requires C, 63.26; H, 4.64; Cl, 11.67; N, 4.61; S, 10.55%); *v*<sub>max</sub>/cm<sup>-1</sup> (KBr) 3336 (b, NH), 1653 (CO), 1523, 817; δ<sub>H</sub> (270 MHz) 2.28 (3H, s, ArCH<sub>3</sub>), 7.04-7.45 (9 H, m, ArH), 8.05 [1H, s, C(3)HCl=], 8.63 (1H, b s, NH); δ<sub>C</sub> (67.8 MHz) 20.8 (ArCH<sub>3</sub>), 120.3, 127.4, 128.3, 129.5, 129.6 (aromatic CH), 130.9, 132.6, 134.5, 134.7 [quaternary aromatic C or C(2)S], 140.3 [C(3)HCl=], 160.3 (CO). *m/z* 303 (M<sup>+</sup>, 42 %), 267 (30, M<sup>+</sup> -Cl), 159 (23), 134 (100, [PhS=C=CH]<sup>+</sup>), 106 (21), 77 (18, Ph).

#### *N*-Benzyl-*Z*-3-chloro-2-(phenylthio)propenamide **51**

This was prepared following the procedure (Method A) described for β-chloroacrylamide **3** using *N*-benzyl-2-(phenylthio)propanamide **9** (10.6 g, 39.11 mmol), NCS (10.18 g, 76.26 mmol) and toluene (212 ml). The reaction solution was heated for 4 h at 90°C. Purification by chromatography on silica gel using ethyl acetate-hexane (20:80) as eluent gave the β-chloroacrylamide **51** (9.52 g, 81%) as a colourless solid, mp 78-79 °C; (Found C, 63.33; H, 4.63; N, 4.61; S, 10.98; Cl, 11.93. C<sub>16</sub>H<sub>14</sub>ClNOS requires C, 63.26; H, 4.65; N, 4.61; S, 10.55; Cl, 11.67%); *v*<sub>max</sub>/cm<sup>-1</sup> (KBr) 3406 (b, NH), 1654 (CO), 1519; δ<sub>H</sub> (270 MHz) 4.40 (2H, d, *J* 6, CH<sub>2</sub>NH),

6.82-7.35 (11H, m, ArH, NH), 7.96 [1H, s, C(3)HCl=];  $\delta_{\text{C}}$  (67.8 MHz) 44.1 (CH<sub>2</sub>NH), 127.1, 127.3, 127.5, 128.2, 128.6, 129.6 (aromatic CH), 130.5, 132.9, 137.3 [quaternary aromatic C and C(2)S], 139.6 [C(3)HCl=], 162.3 (CO);  $m/z$  303 ( $M^+$ , 21 %), 268 (37,  $M^+$  - Cl), 158 (100), 134 (40, [PhS=C=CH]<sup>+</sup>), 91 (50, [PhCH<sub>2</sub>]<sup>+</sup>), 77 (12).

### ***N*-Ethyl-*Z*-3-chloro-2-(phenylthio)propenamide 52**

This was prepared following the optimised procedure (Method A) described for  $\beta$ -chloroacrylamide **3** using *N*-ethyl-2-(phenylthio)propanamide **10** (6.50 g, 31.10 mmol), NCS (8.10 g, 60.65 mmol) and toluene (130 ml). The reaction mixture was heated for 2 h at 90°C. Following filtration and evaporation of the toluene, the  $\beta$ -chloroacrylamide **52** was isolated (6.23 g, 81%) as an off-white solid which required no further purification, mp 59-61 °C; (Found C, 54.23; H, 5.27; N, 5.66; Cl, 14.23; S, 13.68. C<sub>11</sub>H<sub>12</sub>ClNOS requires C, 54.65; H, 5.00; N, 5.79; Cl, 14.67; S, 13.26%);  $\nu_{\text{max}}/\text{cm}^{-1}$  (KBr) 3431 (b NH), 1647 (CO);  $\delta_{\text{H}}$  (270 MHz) 0.96 [3H, t,  $J$  7, C(2')H<sub>3</sub>], 3.19-3.35 (2H, m, NCH<sub>2</sub>), 6.82 (1H, b s, NH), 7.18-7.44 (5H, m, ArH), 7.91 [1H, s, C(3)HCl=];  $\delta_{\text{C}}$  (67.8 MHz) 14.4 [C(2')H<sub>3</sub>], 35.0 (NCH<sub>2</sub>), 127.1, 128.1, 129.2 (aromatic CH), 130.7, 133.0 [quaternary aromatic C and C(2)S], 138.9, [C(3)HCl=], 162.2 (CO);  $m/z$  241 ( $M^+$ , 84%), 134 (100, [PhSC=CH]<sup>+</sup>), 109 (17), 77 (12).

### ***N*-*i*-Propyl-*Z*-3-chloro-2-(phenylthio)propenamide 53**

This was prepared following the procedure (Method A) described for  $\beta$ -chloroacrylamide **3** using *N*-isopropyl-2-(phenylthio)propanamide **11** (4.88 g, 21.88 mmol), NCS (5.70 g, 42.67 mmol) and toluene (98 ml). The reaction mixture was heated for 3 h at 90°C. Following filtration and evaporation of the solvent at reduced pressure, the crude  $\beta$ -chloroacrylamide **53** was isolated. The crude product was purified by chromatography on silica gel using ethyl acetate-hexane (15:85) as eluent to give the  $\beta$ -chloroacrylamide **53** as an off-white solid (5.00 g, 89 %), mp 74-76 °C; (Found C, 56.62; H, 5.56; N, 5.68; Cl, 14.10; S, 12.71. C<sub>12</sub>H<sub>14</sub>ClNOS requires C, 56.35; H, 5.52; N, 5.48; Cl, 13.86; S, 12.54%);  $\nu_{\text{max}}/\text{cm}^{-1}$  (KBr) 3255 (b NH), 1638 (CO), 1540, 742;  $\delta_{\text{H}}$  (270 MHz) 0.98 [6H, d,  $J$  8, CH(CH<sub>3</sub>)<sub>2</sub>], 3.90-4.08 (1H, m, NCH), 6.47-6.61 (1H, b d, NH), 7.18-7.39 (5H, m, ArH), 7.83 [1H, s, C(3)HCl=];  $\delta_{\text{C}}$

(67.8 MHz) 22.2 [CH(CH<sub>3</sub>)<sub>2</sub>], 42.0 (NCH), 127.1, 128.4, 129.4 (aromatic CH), 131.1, 133.0 (quaternary aromatic C and C(2)S), 137.9 [C(3)HCl=], 161.3 (CO); *m/z* 255 (M<sup>+</sup>, 22%), 220 (8, M<sup>+</sup> - Cl), 134 (39, [PhS=C=CH]<sup>+</sup>), 110 (100), 91 (8), 77 (22).

#### ***N-n*-Butyl-*Z*-3-chloro-2-(phenylthio)propenamide 54**

This was prepared following the procedure (Method A) described for β-chloroacrylamide **3** using *N-n*-butyl-2-(phenylthio)propanamide **12** (3.37 g, 14.22 mmol), NCS (3.70 g, 27.73 mmol) and toluene (68 ml). The reaction mixture was heated for 3 h at 90°C. Following filtration and evaporation of the solvent at reduced pressure, the crude β-chloroacrylamide **54** was isolated. The crude product was purified by chromatography on silica gel using ethyl acetate-hexane (15:85) as eluent to give the β-chloroacrylamide **54** as clear oil (3.10 g, 81 %); (Found C, 57.77; H, 6.12; N, 5.21; Cl, 13.00; S, 12.00. C<sub>13</sub>H<sub>16</sub>NCIOS requires C, 57.87; H, 5.98; N, 5.19; Cl, 13.14; S, 11.88%); *v*<sub>max</sub>/cm<sup>-1</sup> (film) 3314 (br, NH), 1651 (CO), 1519, 739; δ<sub>H</sub> (270 MHz) 0.79 [3H, t, *J* 7, C(4')H<sub>3</sub>], 1.02-1.19 [2H, m, C(3')H<sub>2</sub>], 1.24-1.41 [2H, m, C(2')H<sub>2</sub>], 3.21 (2H, q, *J* 7, NCH<sub>2</sub>), 6.82 (1H, b s, NH), 7.18-7.38 (5H, m, ArH), 7.93 [1H, s, C(3)HCl=]; δ<sub>C</sub> (67.8 MHz) 13.6 [C(4')H<sub>3</sub>], 20.0 [C(3')H<sub>2</sub>], 31.3 [C(2')H<sub>2</sub>], 39.8 (NCH<sub>2</sub>), 127.1, 128.2, 129.5 (aromatic CH), 130.8, 133.1 [quaternary aromatic C and C(2)S], 139.0 [C(3)HCl=], 162.2 (CO); *m/z* 269.0511 (M<sup>+</sup>, C<sub>13</sub>H<sub>16</sub>N<sup>35</sup>CIOS requires 269.0641). 269 (34, M<sup>+</sup>), 234 (12, M<sup>+</sup> - Cl), 197 (19, M<sup>+</sup> - NHR), 169 (17, M<sup>+</sup> - CONHR), 150 (12, M<sup>+</sup> - SPh), 134 (100, [PhS=C=CH]<sup>+</sup>), 109 (25, [SPh]<sup>+</sup>), 57 (34).

#### ***N*-Methyl-*Z*-3-chloro-2-(phenylthio)propenamide 55**

This was prepared following the procedure (Method A) described for β-chloroacrylamide **3** using *N*-methyl-2-(phenylthio)propanamide **13** (2.84 g, 15 mmol), NCS (3.79 g, 28 mmol) and toluene (50 ml). The reaction mixture was heated for 3.5 h at 90°C. Following filtration and evaporation of the solvent at reduced pressure, the crude β-chloroacrylamide **55** was isolated. The crude product was purified by chromatography on silica gel using ethyl acetate-dichloromethane-hexane (4:1:5) as eluent to give the β-chloroacrylamide **55** as a white solid (2.28 g, 69 %); *v*<sub>max</sub>/cm<sup>-1</sup> (KBr) 3373 (br, NH), 1648 (CO), 1518; δ<sub>H</sub> (300 MHz) 2.79 (3H, d, *J* 5.0, NCH<sub>3</sub>), 6.97 (1H, b s, NH), 7.19-7.29 (5H, m, ArH), 7.98 [1H, s, C(3)HCl=]; δ<sub>C</sub> (67.8 MHz) 26.9 (NCH<sub>3</sub>), 126.9, 127.6, 129.5 (aromatic CH), 130.0, 132.9 [quaternary aromatic C

and C(2)S], 140.1 [C(3)HCl=], 163.1 (CO);  $m/z$  227 ( $M^+$ , 75%), 192 (32, [ $M - ^{35}\text{Cl}]^+$ ), 134 (100, [ $\text{PhSC}=\text{CH}]^+$ ), 58 (97, [ $\text{CONHCH}_3$ ]).

### ***N*-2'-Propenyl-*Z*-3-chloro-2-(phenylthio)propenamide **56****

This was prepared following the procedure (Method A) described for  $\beta$ -chloroacrylamide **3** using *N*-2'-propenyl-2-(phenylthio)propanamide **14** (2.80 g, 12.67 mmol), NCS (3.30 g, 24.71 mmol) and toluene (60 ml). The reaction mixture was heated for 3.5 h at 90°C. Following filtration and evaporation of the solvent at reduced pressure, the crude  $\beta$ -chloroacrylamide **56** was isolated. The crude product was purified by chromatography on silica gel using ethyl acetate-hexane (15:85) as eluent to give the  $\beta$ -chloroacrylamide **56** as a clear oil (2.71 g, 84 %); (Found C, 56.45; H, 4.84; N, 5.25; S, 12.75; Cl, 14.34.  $\text{C}_{12}\text{H}_{12}\text{ClNOS}$  requires C, 56.80; H, 4.77; N, 5.52; S, 12.64; Cl, 13.97%);  $\nu_{\text{max}}/\text{cm}^{-1}$  (film) 3314 (br, NH), 1655 (CO), 1560, 1515, 740;  $\delta_{\text{H}}$  (270 MHz) 3.80-3.91 (2H, m,  $\text{NCH}_2$ ), 4.81-5.02 (2H, m,  $=\text{CH}_2$ ), 5.56-5.73 (1H, m,  $\text{CH}=\text{}$ ), 6.96 (1H, b s, NH), 7.18-7.29 (5H, m, ArH), 7.96 [1H, s, C(3)HCl=];  $\delta_{\text{C}}$  (67.8 MHz) 42.2 ( $\text{NCH}_2$ ), 116.3 ( $=\text{CH}_2$ ), 127.0, 128.4, 129.4 (aromatic CH), 130.4, 132.95 (quaternary aromatic C and C(2)S), 133.2 ( $\text{CH}=\text{}$ ), 139.66 [C(3)HCl=], 162.1 (CO);  $m/z$  253 ( $M^+$ , 25%), 218 (52,  $M^+ - \text{Cl}$ ), 144 (12), 134 (100, [ $\text{PhSC}=\text{C}=\text{CH}]^+$ ), 108 (56), 77 (19).

### ***N*-3'-Phenylpropenyl-*Z*-3-chloro-2-(phenylthio)propanamide **57****

#### **Method B**

A solution of the sulfide **15** (0.51 g, 1.7 mmol) in carbon tetrachloride (10 ml) was stirred at room temperature under nitrogen; NCS (0.50 g, 3.7 mmol) was added in one portion. The reaction mixture was stirred at room temperature for 10 min then heated to reflux for 18 h. The reaction mixture was cooled, filtered and concentrated to give the  $\beta$ -chloroacrylamide **57**. Purification by chromatography using ethyl acetate-hexane (10:90) as eluent gave **57** (0.37 g, 67 %) as a colourless oil;  $\nu_{\text{max}}/\text{cm}^{-1}$  (neat) 3384 (br NH), 1651 (CO  $\alpha,\beta$ -unsaturated amide);  $\delta_{\text{H}}$  (270 MHz) 3.97-4.03 [2H, m, C(1')H<sub>2</sub>], 5.86-5.97 [1H, dt,  $J$  16, 6, C(2')H], 6.27 [1H, dd,  $J$  16, < 1, C(3')H], 6.98 (1H, br s, NH), 7.18-7.42 (10H, m, ArH), 7.96 [1H, s, C(3)HCl=];  $\delta_{\text{C}}$  (67.8 MHz) 41.9 [C(1')H<sub>2</sub>], 124.6, 126.46, 127.1, 127.4, 128.18, 128.5, 129.5 (aromatic CH or CH=CH), 130.4 [quaternary aromatic C or C(2)S], 132.1 (aromatic CH or CH=CH),

132.9, 136.4 [quaternary aromatic C or C(2)S], 139.6 [C(3)HCl=], 162.2 (CO);  $m/z$  329 ( $M^+$ , 28%), 294 (52,  $M^+$  - Cl), 184 (69), 134 (100, [PhS=C=CH] $^+$ ).

### ***N*-4'-Fluorophenyl-*Z*-3-chloro-2-(phenylthio)propenamide **58****

The title compound was prepared following the procedure (Method A) described for  $\beta$ -chloroacrylamide **3** using *N*-4'-fluorophenyl-2-(phenylthio)propanamide **16** (5.00 g, 18.20 mmol), NCS (4.74 g, 35.50 mmol) and toluene (100 ml). The reaction mixture was heated at 90°C for 2.5 h. Purification by chromatography on silica gel using ethyl acetate-hexane (20:80) as eluent gave the  $\beta$ -chloroacrylamide **58** (5.32 g, 95%) as a colourless solid; mp 96-97°C; (Found C, 58.46; H, 3.64; N, 4.50; Cl, 11.55; F, 5.70; S, 10.23.  $C_{15}H_{11}NClFOS$  requires C, 58.54; H, 3.60; N, 4.55; Cl, 11.52; F, 6.17; S, 10.42%);  $\nu_{\max}/\text{cm}^{-1}$  (KBr) 1658 (CO), 1608, 1523, 1406, 1214, 832;  $\delta_H$  (270 MHz) 6.96 [2H, overlapping dd,  $J$  9, 9, C(3')H], 7.17-7.38 (7H, m, ArH), 8.03 [1H, s, C(3)HCl=], 8.65 (1H, b s, NH);  $\delta_C$  (67.8 MHz) 116.1 [d,  $^2J_{CF}$  22, aromatic CH, ArC(3')], 122.5 [d,  $^3J_{CF}$  9, aromatic CH, ArC(2')], 127.9, 128.7, 130.2 (aromatic CH), 131.2, 132.9, 133.6 [quaternary aromatic C or C(2)S], 141.1 [C(3)HCl=], 160.3 [d,  $^1J_{CF}$  245, quaternary aromatic, ArC(4')], 160.9 (CO);  $m/z$  307.0243 ( $M^+$ ,  $C_{15}H_{11}N^{35}ClFOS$  requires 307.0234). 307 ( $M^+$ , 75%), 272 (45,  $M^+$  - Cl), 271 (46,  $M^+$  - HCl), 197 (52), 169 (78,  $M^+$  - CONHAr), 134 (100,  $M^+$  - Cl - CONHAr).

### ***Z*-3-Chloro-2-(phenylthio)propenamide **59****

This was prepared following the optimised procedure (Method A) described for  $\beta$ -chloroacrylamide **3** using 2-(phenylthio)propanamide **17** (2.48 g, 13.7 mmol), NCS (3.57 g, 26.72 mmol) and toluene (60 ml). The reaction solution was heated for 2.5 hours at 90°C. Following filtration and evaporation of the solvent at reduced pressure, the crude  $\beta$ -chloroacrylamide **59** was isolated as a colourless solid with evidence of some impurities; integration of the crude NMR spectrum of this product suggests it contains up to 44% of the dichloroacrylamide. The succinimide cake was reslurried in  $CCl_4$  and following filtration a further 0.14 g of clean product was recovered (total of 1.36 g, 46%). The crude product can also be purified by chromatography on silica gel using hexane ethyl acetate (75:25) as eluent, mp 128-130 °C; (Found C, 50.80; H, 3.72; N, 6.30; S, 14.65; Cl, 16.90.  $C_9H_8ClNOS$  requires C, 50.59; H, 3.77; N, 6.56; S, 15.01; Cl, 16.59%);  $\nu_{\max}/\text{cm}^{-1}$  (KBr) 3447 (sharp NH),

1685, 1659 (CO  $\alpha,\beta$ -unsaturated amide);  $\delta_{\text{H}}$  (270 MHz) 6.07 (1H, br s, NH), 6.71 (1H, br s, NH), 7.20-7.33 (5H, m, ArH), 7.96 [1H, s, C(3)HCl=];  $\delta_{\text{C}}$  (67.8 MHz) 127.1, 128.1, 129.5 (aromatic CH), 130.0, 132.9 (quaternary aromatic C and C(2)S), 140.9 [C(3)HCl=], 164.7 (CO);  $m/z$  213 ( $\text{M}^+$ , 16%), 178 (10,  $\text{M}^+$  - Cl), 134 (18, [PhSC=CH] $^+$ ), 110 (18).

***N,N*-Diphenyl-*Z*-3-chloro-2-(phenylthio)propenamide 60 and *N,N*-diphenyl-*E*-3-chloro-2-(phenylthio)propenamide 61**

Method C

NCS (1.69 g, 12.0 mmol) was added in one portion to a solution of sulfide **18** (2.00 g, 6 mmol) in toluene (40 ml). The flask was immediately immersed in an oil bath at 130 °C and heating at reflux was maintained for 1.5 h while stirring. The reaction mixture was cooled to 0 °C, the succinimide by-product was removed by filtration and the solvent was evaporated under reduced pressure to give a crude reaction mixture (close to quantitative) of *E* and *Z*- $\beta$ -chloroacrylamides (equimolar mixture). Purification by repeated chromatography was possible using DCM-hexane (50:50) to elute the less polar *N,N*-diphenyl-*E*-3-chloro-2-(phenylthio)propenamide **61** (tentatively assigned) (Rf 0.4 ethyl acetate-hexane (25:75) as eluent) (0.77 g, 36 % characterised as a mixture (3:2) with the *Z* isomer) as a low melting solid; (Found 69.29; H, 4.56; N, 3.53; S, 9.00; Cl, 9.69.  $\text{C}_{21}\text{H}_{16}\text{ClNOS}$  requires C, 68.94; H, 4.41; N, 3.83; S, 8.76; Cl, 9.69%);  $\delta_{\text{H}}$  (270 MHz) 6.24 [1H, s, C(3)HCl=], 6.94-7.63 (15H, m, ArH);  $\delta_{\text{C}}$  (67.8 MHz) signal seen in  $^{13}\text{C}$  NMR of mixture at 122.6 [quaternary aromatic C or C(2)S], other signals present in complex series of peaks between 127 and 143 ppm), 165.3 (CO);  $m/z$  365 ( $\text{M}^+$ , 22%), 330 (25,  $\text{M}^+$  - Cl), 167 (55), 134 (95, [PhS=C=CH] $^+$ ); and ethyl acetate-DCM-hexane(20:40:40) to elute the more polar *N,N*-diphenyl-*Z*-3-chloro-2-(phenylthio)propenamide **60** (tentatively assigned) (Rf 0.35) (0.89 g, 41 % contains < 10 % of *E* isomer) as a light green, crystalline solid, mp 125-130 °C; (Found 68.60; H, 4.50; N, 3.59; Cl, 9.80; S, 8.42.  $\text{C}_{21}\text{H}_{16}\text{ClNOS}$  requires C, 68.94; H, 4.41; N, 3.83; Cl, 9.69; S, 8.76%);  $\nu_{\text{max}}/\text{cm}^{-1}$  (KBr) 1644, 1586 (CO  $\alpha,\beta$ -unsaturated amide);  $\delta_{\text{H}}$  (270 MHz) 6.76 (3H, br m, ArH), 7.07 [1H, s, C(3)HCl=], 7.23-9.67 (12H, m, ArH);  $\delta_{\text{C}}$  (67.8 MHz) 127.2, 127.6 (aromatic CH), 128.6, 128.7 [quaternary aromatic C or C(2)S], 129.0, 129.2, 129.3, 131.7 (aromatic CH), 133.9, 136.8 [quaternary aromatic C or C(2)S], 142.5 (C(3)HCl=), 165.4 (CO);

$m/z$  365 ( $M^+$ , 13%), 330 (22,  $M^+ - Cl$ ), 169 (45,  $[NPh_2+H]^+$ ), 134 (100,  $[PhS=C=CH]^+$ ).

***N, N*-Dimethyl-*Z*-3-chloro-2-(phenylthio)propenamide **62** and *N, N*-Dimethyl-*E*-3-chloro-2-(phenylthio)propenamide **63** and *N, N*-Dimethyl-3,3-dichloro-2-(phenyl-thio)propenamide **103** and *N, N*-Dimethyl-2,3,3-trichloro-2-(phenylthio)propenamide **104****

This was prepared following the procedure (Method A) described for  $\beta$ -chloroacrylamide **3** using *N, N*-dimethyl-2-(phenylthio)-propanamide **19** (5.00 g, 23.92 mmol), NCS (6.71 g, 50.23 mmol) and toluene (100 ml). The reaction solution was heated for 2 hours at 90°C. Following filtration and evaporation of the solvent at reduced pressure, the crude product mixture was isolated. NMR of the crude showed approximately 20% minor  $\beta$ -chloroacrylamide **63**, 40% major  $\beta$ -chloroacrylamide **62** and 40% of the dichloroacrylamide **103**. Following chromatography on silica using DCM-hexane (70:30), the major  $\beta$ -chloroacrylamide **62** eluted as a mixture with the dichloroacrylamide **103** (3.12g, 77% of isolated mass) as the less polar fraction in a ratio of 1:1.  $\beta$ -Chloroacrylamide **62**:  $\nu_{max}/cm^{-1}$  (film) 1650 (CO), 1574;  $\delta_H$  (270 MHz) 2.84 [3H, s, one of  $N(CH_3)_2$ ], 2.89 [3H, s, one of  $N(CH_3)_2$ ], 6.25 [1H, s,  $C(3)HCl=$ ], 7.31-7.42 (3H, m,  $ArH$ ), 7.50-7.61 (2H, m,  $ArH$ ).  $\delta_C$  (67.8 MHz) 34.6, 38.3 ( $NCH_3$ ), 116.9 [ $C(3)HCl=$ ], 117.3 [ $C(2)S$ ], 128.8, 129.3, 134.1 (aromatic CH), 136.6 (quaternary aromatic C), 164.3 (CO);  $m/z$  (EI) 241 ( $M^+$ , 45%), 206 (25,  $M^+ - Cl$ ), 134 (70,  $[PHS=C=CH]^+$ ), 72 (100,  $[CON(CH_3)_2]^+$ ). Dichloroacrylamide **103**:  $\delta_H$  (270 MHz) 2.60 [3H, s, one of  $N(CH_3)_2$ ], 2.81 [3H, s, one of  $N(CH_3)_2$ ], 7.31-7.42 (3H, m,  $ArH$ ), 7.50-7.61 (2H, m,  $ArH$ );  $\delta_C$  (67.8 MHz) 34.1, 37.2 [ $N(CH_3)_2$ ], 128.6 [quaternary aromatic C,  $CCl_2$  or  $C(2)S$ ], 128.9, 129.1 (aromatic CH), 132.2, 134.1 [quaternary aromatic C,  $CCl_2$  or  $C(2)S$ ], 162.6 (CO);  $m/z$  (EI) 275 ( $M^+$ , 10%). The minor  $\beta$ -chloroacrylamide **63** was isolated (0.80g, 20% of isolated mass) as a clear oil;  $\nu_{max}/cm^{-1}$  (neat) 1651 (CO amide);  $\delta_H$  (270 MHz) 2.56 [3H, s, one of  $N(CH_3)_2$ ], 2.89 [3H, s, one of  $N(CH_3)_2$ ], 6.35 [1H, s,  $C(3)HCl=$ ], 7.26-7.41 (3H, m,  $ArH$ ), 7.46-7.59 (2H, m,  $ArH$ ).  $\delta_C$  (67.8 MHz) 34.4, 37.3 [ $N(CH_3)_2$ ], 117.5 [ $C(3)HCl=$ ], 129.3 (aromatic CH), 129.9, 130.2 [quaternary aromatic C and  $C(2)S$ ], 133.2, 135.1 (aromatic CH), 164.6 (CO);  $m/z$  (EI) 206.06342 ( $M^+$ ,  $C_{11}H_{12}ClNOS$  requires  $M^+$  206.06396). 241 ( $M^+$ , 15%), 206 (9,  $M^+ - Cl$ ), 134 (31,  $[PhS=C=CH]^+$ ), 72 (100).

A further 150 mg (3% of isolated mass) of what is believed to be the trichloride **104** was also isolated:  $\delta_{\text{H}}$  (270 MHz) 2.91 [3H, b s, one of  $\text{N}(\text{CH}_3)_2$ ], 3.41 [3H, b s, one of  $\text{N}(\text{CH}_3)_2$ ], 6.28 [1H, s,  $\text{CHCl}_2$ ], 7.31-7.60 (5H, m,  $\text{ArH}$ );  $\delta_{\text{C}}$  (67.8 MHz) 38.0-40.5 [2 broad signals, both of  $\text{N}(\text{CH}_3)_2$ ], 76.8 ( $\text{CHCl}_2$ ), 79.91 ( $\text{SCCl}$ ), 128.3 (quaternary aromatic C), 129.4 (aromatic CH), 131.2 (aromatic CH), 136.6 (aromatic CH), 163.1 (CO).

**(±)-N-1'-Phenylethyl-Z-3-chloro-2-(phenylthio)propenamide 64 and (±)-N-1'-phenylethyl-2-(phenylthio)propenamide 124**

This was prepared following the procedure (method B) described for  $\beta$ -chloroacrylamide **57** using (1'R\*, 2R\*)-N-1'-phenylethyl-2-(phenylthio)propanamide **20** (156 mg, 0.55 mmol), NCS (161 mg, 1.20 mmol) and carbon tetrachloride (3 ml). Purification by chromatography using ethyl acetate-hexane (5:95) gave (±)-N-1'-phenylethyl-Z-3-chloro-2-(phenylthio)propenamide **64** (113 mg, 65%) (Rf 0.5 using ethyl acetate-hexane (25:75) as eluent) as a white, crystalline solid; mp 51-53 °C;  $\nu_{\text{max}}/\text{cm}^{-1}$  3304 (br NH), 1641 (CO), 1560;  $\delta_{\text{H}}$  (270 MHz) 1.30 [3H, d,  $J$  7,  $\text{C}(2')\text{H}_3$ ], 4.83-5.10 (1H, dq,  $J$  8, 7, NCH), 6.95-7.34 (11H, m,  $\text{ArH}$  and NH), 7.88 [1H, s,  $\text{C}(3)\text{HCl=}$ ];  $\delta_{\text{C}}$  (67.8 MHz) 21.4 [ $\text{C}(2')\text{H}_3$ ], 49.4 (NCH), 125.8, 127.2, 128.6, 128.8, 129.6 (aromatic CH, 5 signals for 6 carbons), 130.8, 133.0 [quaternary aromatic C and  $\text{C}(2)\text{S}$ ], 138.5 [ $\text{C}(3)\text{HCl=}$ ], 142.3 (quaternary aromatic C), 161.3 (CO) and (1'R/ S)-N-1'-phenylethyl-2-(phenylthio)propenamide **124** (37 mg, 24%) (Rf 0.45) as an off-white solid;  $\delta_{\text{H}}$  (60 MHz) 1.27 [3H, d,  $J$  7,  $\text{C}(2')\text{H}_3$ ], 3.88-5.02 (1H, dq,  $J$  7, 7, NCH), 5.9 (1H, d,  $J$  < 2,  $\text{CH}_\text{A}\text{H}_\text{B=}$ ), 6.63 (1H, d,  $J$  < 2,  $\text{CH}_\text{A}\text{H}_\text{B=}$ ), 6.77-7.34 (11H, m,  $\text{ArH}$  and NH).

**64** & **124** were also prepared using (1'R\*, 2S\*)-N-1'-phenylethyl-2-(phenylthio)propanamide **20**, NCS and carbon tetrachloride, to give **64** in 19% yield and **124** in 20% yield, with spectral characteristics identical to above.

**(1'S)-N-1'-Phenylethyl-Z-3-chloro-2-(phenylthio)propenamide 65**

This was prepared following the procedure (method B) described for  $\beta$ -chloroacrylamide **57** using (1'S)-N-1'-phenylethyl-2-(phenylthio)propanamide **21** (1.36 g, 4.77 mmol) as a mixture of diastereomers, NCS (1.34 g, 10.02 mmol) and

carbon tetrachloride (30 ml). Purification by chromatography using ethyl acetate-hexane (10:90) gave (1'S)-*N*-1'-phenylethyl-*Z*-3-chloro-2-(phenylthio)propenamide **65** (1.07 g, 67 %) as a white, crystalline solid; mp 53-55 °C;  $[\alpha]_D^{20}$  0.98 (c 8.0 in ethanol). and (1'S)-*N*-1'-phenylethyl-2-(phenylthio)propenamide **125** (0.23 g, 15 %). Spectral characteristics and other analyses were identical to those observed for  $\beta$ -chloroacrylamide **64** and acrylamide **124**.

### ***N*-Benzyl-*Z*-3-chloro-2-(*n*-butylthio)propenamide 66**

#### Method D

Unrecrystallised NCS (4.47 g, 33.47 mmol) was added in one portion to a solution of the sulfide **22** (4.00 g, 15.94 mmol) in toluene (80 ml). The flask was immediately immersed in an oil bath at 120°C and heating was maintained for 3 hours with stirring. The reaction mixture was cooled to 0°C and the succinimide by-product removed by filtration. The solvent was evaporated at reduced pressure to give the crude  $\beta$ -chloroacrylamide **66** (4.42 g, 98%) as an oil which was purified by chromatography on silica gel using ethyl acetate-hexane (gradient elution 5 to 30% ethyl acetate) as eluent to give the  $\beta$ -chloroacrylamide **66** as a clear oil (3.76 g, 84 %) which solidified on storing in the freezer overnight, (Found C, 58.75; H, 6.31; N, 5.06; S, 11.70. C<sub>14</sub>H<sub>18</sub>ClNOS requires C, 59.25; H, 6.39; N, 4.94; S, 11.30%);  $\nu_{\max}/\text{cm}^{-1}$  (film) 3304 (br NH), 1648 (CO), 1560;  $\delta_{\text{H}}$  (270 MHz) 0.87 (3H, t, *J* 7, CH<sub>3</sub>), 1.28-1.62 [4H, m, C(3')H<sub>2</sub>, C(2')H<sub>2</sub>], 2.67 (2H, d, *J* 7, SCH<sub>2</sub>), 4.54 (2H, d, *J* 6, NCH<sub>2</sub>), 7.24-7.39 (5H, m, ArH), 7.50 (1H, b s, NH), 7.78 [1H, s, C(3)HCl=];  $\delta_{\text{C}}$  (67.8 MHz) 13.9 [C(4')H<sub>3</sub>], 22.1 [C(3')H<sub>2</sub>], 32.2 [C(2')H<sub>2</sub>], 34.5 (SCH<sub>2</sub>), 44.5 (NCH<sub>2</sub>), 128.1, 128.2, 129.2 (aromatic CH), 132.2 (quaternary aromatic C), 137.9 [C(3)HCl=], 138.2 [C(2)S], 163.5 (CO); *m/z* (EI) 283 (M<sup>+</sup>, 8%), 248 (12, M<sup>+</sup> - Cl), 158 (22), 106 (11), 91 (68). A trace amount (2%) of the corresponding trichloride was evident in the NMR spectra of both the crude and the purified material as a singlet at  $\delta_{\text{H}}$  6.56.

### ***N*-4'-Methylphenyl-*Z*-3-chloro-2-(*n*-butylthio)propenamide 67**

This was prepared following the optimised procedure (Method D) described for  $\beta$ -chloroacrylamide **66** using *N*-4'-methylphenyl-2-(*n*-butylthio)propanamide **23** (4.00 g, 15.94 mmol), NCS (4.15 g, 31.08 mmol) and toluene (80 ml). The reaction mixture

was heated at 120°C for 2.5 hours. Following filtration and evaporation of the toluene, the crude  $\beta$ -chloroacrylamide **67** was isolated. The NMR spectrum of the crude product from this reaction was very clean. Purification by chromatography on silica gel using ethyl acetate-hexane (gradient elution 10-30% ethyl acetate) as eluent gave the analytically pure  $\beta$ -chloroacrylamide **67** as a clear oil (3.76 g, 84 %) which solidified on storing in the freezer overnight, (Found C, 59.04; H, 6.39; N, 4.72; S, 11.55.  $C_{14}H_{18}ClNOS$  requires C, 59.25; H, 6.39; N, 4.94; S, 11.30%);  $\nu_{\max}/\text{cm}^{-1}$  (film) 3301 (br NH), 1655 (CO), 1595;  $\delta_{\text{H}}$  (270 MHz) 0.89 (3H, t,  $J$  7,  $C(4')H_3$ ), 1.38-1.69 [4H, m,  $C(3')H_2$ ,  $C(2')H_2$ ], 2.33 (3H, s,  $\text{ArCH}_3$ ), 2.78 (2H, d,  $J$  7,  $\text{NCH}_2$ ), 7.14-7.46 (4H, ABq,  $J$  8,  $\text{ArH}$ ), 7.84 [1H, s,  $C(3)\text{HCl=}$ ], 8.99 (1H, b s, NH);  $\delta_{\text{C}}$  (67.8 MHz) 13.4 [ $C(4')H_3$ ], 20.8 ( $\text{ArCH}_3$ ), 21.7 [ $C(3')H_2$ ], 31.6 [ $C(2')H_2$ ], 34.3 ( $\text{SCH}_2$ ), 120.1 (aromatic CH), 129.6 (aromatic CH), 132.4 (quaternary aromatic C), 134.6, 134.8 [quaternary aromatic C and  $C(2)\text{S}$ ], 138.4 [ $C(3)\text{HCl=}$ ], 160.9 (CO);  $m/z$  283 ( $\text{M}^+$ , 47%), 248 (38,  $\text{M}^+ - \text{Cl}$ ), 194 (17,  $\text{M}^+ - \text{SBu}^n$ ), 107 (100), 91 (23).

A trace amount (2%) of the corresponding trichloride was evident in the NMR spectra of both the crude and the purified material as a singlet at  $\delta_{\text{H}}$  6.68

#### ***N*-4'-Fluorophenyl-*Z*-3-chloro-2-(*n*-butylthio)propenamide **68****

The title compound was prepared following the procedure (Method D) described for  $\beta$ -chloroacrylamide **66** using *N*-4'-fluorophenyl-2-(*n*-butylthio)propanamide **24** (5.00 g, 19.61 mmol), NCS (5.37 g, 40.20 mmol) and toluene (100 ml) at 120°C. The reaction solution was heated for 2.5 hours. Purification by chromatography on silica gel using ethyl acetate-hexane (15:85) as eluent gave the  $\beta$ -chloroacrylamide **68** (5.43 g, 96%) as a low melting colourless solid (oil at room temperature); (Found C, 54.68; H, 5.48; N, 4.89; Cl, 12.40; F, 6.25; S, 11.18.  $C_{13}H_{15}NCIFOS$  requires C, 54.25; H, 5.25; N, 4.87; Cl, 12.32; F, 6.60; S, 11.14%);  $\nu_{\max}/\text{cm}^{-1}$  (film) 1655 (CO, w, br), 1510 (vs);  $\delta_{\text{H}}$  (270 MHz) 0.91 [3H, t,  $J$  7,  $C(4')H_3$ ], 1.37-1.51 [2H, m,  $C(3')H_2$ ], 1.56-1.68 [2H, m,  $C(2')H_2$ ], 2.79 (2H, t,  $J$  8,  $\text{SCH}_2$ ), 7.06 (2H, overlapping dd,  $J$  8, 8,  $\text{ArC}(3'')\text{H}$ ), 7.53-7.61 (2H, m,  $\text{ArH}$ ), 7.86 [1H, s,  $C(3)\text{HCl=}$ ], 9.06 (1H, b s, NH);  $\delta_{\text{C}}$  (67.8 MHz) 13.7 [ $C(4')H_3$ ], 21.6 [ $C(3')H_2$ ], 31.6 [ $C(2')H_2$ ], 34.3 ( $\text{SCH}_2$ ), 115.8 (d,  $^2J_{\text{CF}}$  22, aromatic CH,  $\text{ArC}(3'')$ ), 121.9 [aromatic CH,  $\text{ArC}(2'')$ ], 131.0, 133.4 [quaternary aromatic C or  $C(2)\text{S}$ ], 138.9 [ $C(3)\text{HCl=}$ ], 159.7 [d,  $^1J_{\text{CF}}$  245, quaternary aromatic C,  $\text{ArC}(4'')$ ], 161.1 (CO);  $m/z$  287.0561 ( $\text{M}^+$ ,  $C_{13}H_{15}N^{35}\text{ClFOS}$  requires

287.0547). 287 ( $M^+$ , 18%), 252 (12,  $M^+$ - Cl), 198 (10,  $M^+$ - SBu), 164 (25), 111 (100), 41 (92).

#### ***N*-4'-Methylphenyl-*Z*-3-chloro-2-(4'-methoxybenzenethio)propenamide 69**

This was prepared following the procedure (Method A) described for  $\beta$ -chloroacrylamide **3** using *N*-4'-methylphenyl-2-(4'-methoxybenzenethio)propanamide **25** (430 mg, 1.42 mmol), NCS (370 mg, 2.77 mmol) and toluene (9 ml). The reaction solution was heated for 2 hours at 90°C. Following filtration and evaporation of the solvent at reduced pressure, the crude  $\beta$ -chloroacrylamide **69** was isolated as a colourless solid. The crude product was purified by chromatography on silica gel using ethyl acetate-hexane (20:80) as eluent to give the  $\beta$ -chloroacrylamide **69** as a colourless solid (416 mg, 88%), mp 119-120°C; (Found C, 61.36; H, 4.95; N, 4.61; Cl, 10.77; S, 9.54.  $C_{17}H_{16}NClO_2S$  requires C, 61.16; H, 4.83; N, 4.20; Cl, 10.62; S, 9.60%);  $\nu_{\max}/\text{cm}^{-1}$  (KBr) 3328 (br, NH), 1657 (CO), 1522, 1249, 823;  $\delta_H$  (270 MHz) 2.30 (3H, s,  $\text{ArCH}_3$ ), 3.76 (3H, s,  $\text{OCH}_3$ ), 6.80-6.88 (2H, m,  $\text{ArH}$ ), 7.08-7.13 (2H, m,  $\text{ArH}$ ), 7.24-7.34 (4H, m,  $\text{ArH}$ ), 7.90 [1H, s,  $\text{C}(3)\text{HCl=}$ ], 8.65 (1H, b s, NH);  $\delta_C$  (67.8 MHz) 20.9 ( $\text{ArCH}_3$ ), 55.4 ( $\text{OCH}_3$ ), 115.4, 120.2, (aromatic CH), 122.8 [quaternary aromatic C,  $\text{C}(2)\text{S}$ ], 129.6, 131.4 (aromatic CH), 132.3, 134.6 [quaternary aromatic C or  $\text{C}(2)\text{S}$ ], 138.8 [ $\text{C}(3)\text{HCl=}$ ], 159.7 (COMe), 160.4 (CO);  $m/z$  (EI) 333.0585 ( $M^+$ ,  $C_{17}H_{16}N^{35}\text{ClO}_2\text{S}$  requires 333.0590). 333 ( $M^+$ , 70%), 164 (100,  $M^+$ - CONHTol - Cl), 139 (74,  $[\text{SAr}]^+$ ), 106 (61).

#### ***N*-Benzyl-*Z*-3-chloro-2-(4'-methoxybenzenethio)propenamide 70**

##### Method E

Unrecrystallised NCS (0.96 g, 7.14 mmol) was added in one portion to a solution of the *N*-benzyl-2-(4'-methoxy-benzenethio)propanamide **26** (1.04 g, 3.40 mmol) in toluene (21 ml). The flask was immediately immersed in an oil bath at 130°C and heating was maintained for 2 hours with stirring. The reaction mixture was cooled to 0°C and the succinimide by-product removed by filtration. The solvent was evaporated at reduced pressure to give the crude  $\beta$ -chloroacrylamide **70**. The crude product was purified by chromatography on silica gel using ethyl acetate-hexane (20:80) as eluent to give the  $\beta$ -chloroacrylamide **70** as a colourless solid (720 mg, 64 %), mp 76-77°C; (Found C, 61.03; H, 5.11; N, 4.19; Cl, 10.94; S, 9.51.

$C_{17}H_{16}NClO_2S$  requires C, 61.16; H, 4.83; N, 4.20; Cl, 10.62; S, 9.60%;  $\nu_{\max}/\text{cm}^{-1}$  (KBr) 3323 (br, NH), 1636 (CO), 1494, 1029, 820;  $\delta_{\text{H}}$  (270 MHz) 3.83 (3H, s,  $\text{OCH}_3$ ), 4.42 (2H, d,  $J$  6,  $\text{CH}_2\text{Ar}$ ), 6.80-7.46 (10H, m,  $\text{ArH}$ ,  $\text{NH}$  seen as b s at  $\delta_{\text{H}}$  7.09), 7.81 [1H, s,  $\text{C}(3)\text{HCl=}$ ];  $\delta_{\text{C}}$  (67.8 MHz) 44.1 ( $\text{CH}_2\text{Ar}$ ), 55.4 ( $\text{OCH}_3$ ), 115.0, 115.3 (aromatic CH), 123.1 (S-C), 127.7, 128.3, 131.3 (aromatic CH), 133.7, 135.6 [quaternary aromatic C or  $\text{C}(2)\text{S}$ ], 137.5 [ $\text{C}(3)\text{HCl=}$ ], 159.6 (COMe), 162.5 (CO);  $m/z$  (EI) 333.0584 ( $\text{M}^+$ ,  $C_{17}H_{16}N^{35}\text{ClO}_2\text{S}$  requires 333.0590). 333 ( $\text{M}^+$ , 50%), 298 (7,  $\text{M}^+$  - Cl), 164 (25,  $\text{M}^+$  - CONHBn - Cl), 158 (75,  $\text{M}^+$  - SAr - HCl), 149 (23,  $[\text{SAr}]^+$ ), 91 (100).

A signal corresponding to the analogous dichloroacrylamide was also seen at  $\delta_{\text{H}}$  4.21.

### ***N*-Ethyl-*Z*-3-chloro-2-(4'-methoxybenzenethio)propenamide 71**

This was prepared following the optimised procedure (Method A) described for  $\beta$ -chloroacrylamide **3** using *N*-ethyl-2-(4'-methoxybenzenethio)propanamide **27** (1.58 g, 6.61 mmol), NCS (1.70 g, 12.89 mmol) and toluene (32 ml). The reaction solution was heated for 2 hours at 90°C. Following filtration and evaporation of the toluene, and purification by chromatography on silica gel using ethyl acetate-hexane (30:70) as eluent **71** (1.06g, 59%) was isolated as a colourless solid, mp 90-92°C; (Found C, 52.80; H, 5.20; N, 5.26; Cl, 13.55; S, 11.76.  $C_{12}H_{14}NClO_2S$  requires C, 53.03; H, 5.19; N, 5.16; Cl, 13.04; S, 11.80%).  $\nu_{\max}/\text{cm}^{-1}$  (KBr) 3254 (b NH), 1644 (CO), 1496, 1248, 1027;  $\delta_{\text{H}}$  (270 MHz) 0.99 [3H, t,  $J$  7,  $\text{C}(2')\text{H}_3$ ], 3.18-3.31 (2H, m,  $\text{NCH}_2$ ), 3.78 (3H, s,  $\text{OCH}_3$ ), 6.73-6.91 (3H, m,  $\text{ArH}$ ,  $\text{NH}$ ), 7.19-7.28 (2H, m,  $\text{ArH}$ ), 7.75 [1H, s,  $\text{C}(3)\text{HCl=}$ ];  $\delta_{\text{C}}$  (67.8 MHz) 14.9 [ $\text{C}(2')\text{H}_3$ ], 35.4 ( $\text{NCH}_2$ ), 55.8 ( $\text{OCH}_3$ ), 115.4 (aromatic CH), 123.6 (quaternary aromatic C), 131.7 (aromatic CH), 132.6 (quaternary aromatic C or  $\text{C}(2)\text{S}$ ), 137.4 [ $\text{C}(3)\text{HCl=}$ ], 159.9 (COMe), 162.7 (CO);  $m/z$  (EI) 271.0438 ( $\text{M}^+$ ,  $C_{12}H_{14}N^{35}\text{ClO}_2\text{S}$  requires 271.0434). 271 ( $\text{M}^+$ , 100%), 236 (13,  $\text{M}^+$  - Cl), 164 (78,  $\text{M}^+$  - CONHEt), 140 (80), 121 (25).

### ***N*, *N*-Dimethyl-*Z*-3-chloro-2-(4'-methoxybenzenethio)propenamide 72 and *N*, *N*-Dimethyl-*E*-3-chloro-2-(4'-methoxybenzenethio)propenamide 73 and *N*, *N*-Dimethyl-3, 3-dichloro-2-(4'-methoxybenzenethio)propenamide 105**

This was prepared following the optimised procedure (Method A) described for  $\beta$ -chloroacrylamide **3** using *N*, *N*-dimethyl-2-(4'-methoxybenzenethio)propanamide **28**

(2.45 g, 11.72 mmol), NCS (3.05 g, 22.85 mmol) and toluene (49 ml). The reaction solution was heated for 2 hours at 90°C. Following filtration and evaporation of the solvent at reduced pressure, the crude product mixture was isolated. NMR showed a mixture of the two  $\beta$ -chloroacrylamides in a ratio of 3:1 and approximately 8% of the dichloroacrylamide **105**. The crude product was chromatographed on silica gel using dichloromethane-hexane (70:30) as eluent to give a mixture of the major  $\beta$ -chloroacrylamide **72** and the dichloroacrylamide **105** eluting first (less polar) as a clear oil (1.66 g). Major  $\beta$ -chloroacrylamide **72** (73%):  $\nu_{\max}/\text{cm}^{-1}$  (film) 1650 (CO), 1590, 1493, 1397, 1028;  $\delta_{\text{H}}$  (270 MHz) 2.83 [3H, s, one of  $\text{N}(\text{CH}_3)_2$ ], 2.92 [3H, s, one of  $\text{N}(\text{CH}_3)_2$ ], 3.81 (3H, s,  $\text{OCH}_3$ ), 6.03 [1H, s,  $\text{C}(3)\text{HCl=}$ ], 6.88-7.50 (4H, ABq,  $J$  11,  $\text{ArH}$ );  $\delta_{\text{C}}$  (67.8 MHz) 34.3 [one of  $\text{N}(\text{CH}_3)_2$ ], 37.1 [one of  $\text{N}(\text{CH}_3)_2$ ], 55.3 ( $\text{OCH}_3$ ), 114.6 [ $\text{C}(3)\text{HCl=}$ ], 114.9 (aromatic CH), 119.9 (quaternary aromatic C), 135.0 [ $\text{C}(2)\text{S}$ ], 136.3 (aromatic CH), 160.7 (COMe), 164.5 (CO);  $m/z$  (EI) 271.0413 ( $\text{M}^+$ ,  $\text{C}_{12}\text{H}_{14}\text{N}^{35}\text{ClO}_2\text{S}$  requires 271.0434). 271 ( $\text{M}^+$ , 100), 236 (18,  $\text{M}^+ - \text{Cl}$ ), 164 (50,  $\text{M}^+ - \text{CONMe}_2 - \text{Cl}$ ), 139 (17,  $[\text{SAr}]^+$ ). Dichloroacrylamide **105** (6%) characteristic signals:  $\delta_{\text{H}}$  2.62 [3H, s, one of  $\text{N}(\text{CH}_3)_2$ ], 2.80 [3H, s, one of  $\text{N}(\text{CH}_3)_2$ ]. Minor  $\beta$ -chloroacrylamide **73** eluting second (more polar) as a colourless solid (0.44 g, 21 %), mp 67-68°C; (Found C, 53.34; H, 5.29; N, 5.11; Cl, 12.70; S, 11.40.  $\text{C}_{12}\text{H}_{14}\text{NClO}_2\text{S}$  requires C, 53.03; H, 5.19; N, 5.15; Cl, 13.04; S, 11.80%);  $\nu_{\max}/\text{cm}^{-1}$  (KBr) 1634 (CO), 1487, 1251, 1027;  $\delta_{\text{H}}$  (270 MHz) 2.57 [3H, s, one of  $\text{N}(\text{CH}_3)_2$ ], 2.91 [3H, s, one of  $\text{N}(\text{CH}_3)_2$ ], 3.80 (3H, s,  $\text{OCH}_3$ ), 6.23 [1H, s,  $\text{C}(3)\text{HCl=}$ ], 6.81-7.49 (4H, ABq,  $J$  11,  $\text{ArH}$ );  $\delta_{\text{C}}$  (67.8 MHz) 34.5 [one of  $\text{N}(\text{CH}_3)_2$ ], 38.3 [one of  $\text{N}(\text{CH}_3)_2$ ], 55.3 ( $\text{OCH}_3$ ), 114.3 [ $\text{C}(3)\text{HCl=}$ ], 114.4 (aromatic CH), 119.2 (quaternary aromatic C), 136.6 (aromatic CH), 137.6 (SC-), 160.7 (C-OMe), 164.1 (CO);  $m/z$  (EI) 271.0439 ( $\text{M}^+$ ,  $\text{C}_{12}\text{H}_{14}\text{N}^{35}\text{ClO}_2\text{S}$  requires 271.0434). 271 ( $\text{M}^+$ , 100), 236 (20,  $\text{M}^+ - \text{Cl}$ ), 164 (65,  $\text{M}^+ - \text{CONMe}_2 - \text{Cl}$ ), 139 (20,  $[\text{SAr}]^+$ ), 72 (73).

#### ***N*-4'-Methylphenyl-*Z*-3-chloro-2-(4-nitrobenzenethio)propenamide **74****

NCS (0.89 g, 6.65 mmol) was added in one portion to a solution of sulfide **29** (1.00 g, 3.17 mmol) in toluene (20 ml) at room temperature. The flask was immediately immersed in an oil bath at 130°C and heating at reflux was maintained for 2.5 h with stirring. The reaction mixture was cooled to 0°C and the succinimide by-product removed by filtration. The solvent was evaporated at reduced pressure to give the

crude  $\beta$ -chloroacrylamide **74**. The crude product was purified by chromatography on silica gel using ethyl acetate-hexane (gradient elution 15-30% ethyl acetate) to give **74** (0.57 g, 51%) or by trituration from 5% diethyl ether-hexane (71%) as a pale yellow solid, mp 122-124°C; (Found C, 54.68; H, 3.74; N, 8.07; Cl, 10.28; S, 9.61.  $C_{16}H_{13}N_2ClO_3S$  requires C, 55.09; H, 3.76; N, 8.03; Cl, 10.16; S, 9.19%);  $\nu_{\max}/\text{cm}^{-1}$  (KBr) 1674 (CO), 1512, 1334, 740;  $\delta_H$  (270 MHz) 2.29 (3H, s,  $ArCH_3$ ), 7.08-7.14 (2H, m,  $ArH$ ), 7.30-7.41 (4H, m,  $ArH$ ), 8.13-8.20 (2H, m,  $ArH$ ), 8.23 [1H, s,  $C(3)HCl=$ ], 8.54 (1H, b s,  $NH$ );  $\delta_C$  (67.8 MHz) 20.8 ( $ArCH_3$ ), 120.3, 124.9, 127.0 (aromatic CH), 128.6 (quaternary aromatic C), 129.6 (aromatic CH), 134.2, 135.2, 141.8 [quaternary aromatic C or  $C(2)S$ ], 143.4 [ $C(3)HCl=$ ], 146.6 ( $C-NO_2$ ), 159.6 (CO);  $m/z$  (EI) 348.0343 ( $M^+$ ,  $C_{16}H_{13}N_2^{35}ClO_3S$  requires 348.0335). 348 ( $M^+$ , 90%), 312 (70), 214 (20,  $M^+ - CONHTol$ ), 194 (50,  $M^+ - SAr$ ), 168 (100), 160 (90), 106 (95).

#### ***N*-4'-Methylphenyl-*Z*-3-chloro-2-(*iso*-butylthio)propenamide **75****

This was prepared following the procedure (Method A) described for  $\beta$ -chloroacrylamide **3** using *N*-4'-methylphenyl-2-(*iso*-butylthio)-propanamide **30** (2.00 g, 7.94 mmol), NCS (2.07 g, 15.48 mmol) and toluene (40 ml). The reaction solution was heated for 2 hours at 90°C. Following filtration and evaporation of the solvent at reduced pressure, the crude product mixture was isolated. Following purification by column chromatography on silica gel using ethyl acetate-hexane (5:95) as eluant, **75** was obtained as a white solid (1.46 g, 65%), mp 54-56°C; (Found C, 59.20; H, 6.35; N, 5.00; Cl, 12.76; S, 11.08.  $C_{14}H_{18}NClOS$  requires C, 59.25; H, 6.39; N, 4.94; Cl, 12.49; S, 11.30%);  $\nu_{\max}/\text{cm}^{-1}$  (KBr) 3303, 1658 (CO), 1533, 1246, 821;  $\delta_H$  (300 MHz) 1.03 (6H, d,  $J$  6.6, 2 x  $CH_3$ ), 1.71-1.91 [1H, m,  $CH(CH_3)_2$ ], 2.34 (3H, s,  $ArCH_3$ ), 2.66 (2H, d,  $J$  6.8,  $SCH_2$ ), 7.14 (2H, A of ABq,  $J$  8.4,  $ArH$ ), 7.49 (2H, B of ABq,  $J$  8.4,  $ArH$ ), 7.83 [1H, s,  $C(3)HCl=$ ], 8.98 (1H, b s,  $NH$ );  $\delta_C$  (75.5 MHz) 21.3 ( $ArCH_3$ ), 22.2 [ $CH(CH_3)_2$ ], 29.2 [ $CH(CH_3)_2$ ], 44.0 ( $SCH_2$ ), 120.3, 130.1 (aromatic CH), 133.2, 135.0, 135.2 [quaternary aromatic C or  $C(2)S$ ], 138.7 [ $C(3)HCl=$ ], 161.3 (CO);  $m/z$  (EI) 283.07976 ( $M^+$ ,  $C_{14}H_{18}NClOS$  requires 283.08068). 283 ( $M^+$ , 50), 248 (40), 149 (22), 107 (95)

#### ***N*-4'-Fluorophenyl-*Z*-3-chloro-2-(*iso*-butylthio)propenamide **76****

This was prepared following the procedure (Method A) described for  $\beta$ -

chloroacrylamide **3** using *N*-4'-fluorophenyl-2-(*iso*-butylthio)-propanamide **31** (2.00 g, 7.84 mmol), NCS (2.04 g, 15.28 mmol) and toluene (40 ml). The reaction solution was heated for 2 hours at 90°C. Following filtration and evaporation of the solvent at reduced pressure, the crude product mixture was isolated. Following purification by column chromatography on silica gel using ethyl acetate-hexane (5:95) as eluant, **76** was obtained as a white solid (1.44 g, 64%), mp 60-62 °C; (Found C, 54.05; H, 5.17; N, 4.82; Cl, 12.78; S, 11.48, F, 7.01. C<sub>13</sub>H<sub>15</sub>NCIFOS requires C, 54.26; H, 5.25; N, 4.87; Cl, 12.32; F, 6.60; S, 11.14%);  $\nu_{\max}/\text{cm}^{-1}$  (KBr) 3279, 1654 (CO), 1510, 1209, 833;  $\delta_{\text{H}}$  (300 MHz) 1.05 (6H, d, *J* 6.6, 2 x CH<sub>3</sub>), 1.75-1.92 [1H, m, CH(CH<sub>3</sub>)<sub>2</sub>], 2.67 (2H, d, *J* 6.8, SCH<sub>2</sub>), 7.02-7.10 [2H, m, ArC(3')H], 7.53-7.59 [2H, m, ArC(2')H], 7.85 [1H, s, C(3)HCl=], 9.04 (1H, b s, NH);  $\delta_{\text{C}}$  (75.5 MHz) 21.8 [2 x CH(CH<sub>3</sub>)<sub>2</sub>], 28.9 [CH(CH<sub>3</sub>)<sub>2</sub>], 43.7 (SCH<sub>2</sub>), 115.9 [d, <sup>2</sup>*J*<sub>CF</sub> 23, aromatic CH, ArC(3')], 121.7 [d, *J* 8, aromatic CH, ArC(2')], 132.4, 133.4 [quaternary aromatic C or C(2)S], 139.1 [C(3)HCl=], 159.5 [d, <sup>1</sup>*J*<sub>CF</sub> 212, quaternary aromatic C, ArC(4')], 161.1 (CO); *m/z* (EI) 287 (M<sup>+</sup>, 38), 252 (12), 198 (22), 111 (100).

#### ***N*-4'-Ethyl-Z-3-chloro-2-(*iso*-butylthio)propenamide 77**

This was prepared following the procedure (Method A) described for β-chloroacrylamide **3** using *N*-ethyl-2-(*iso*-butylthio)-propanamide **32** (2.00 g, 10.60 mmol), NCS (2.75 g, 20.63 mmol) and toluene (40 ml). The reaction solution was heated for 2 hours at 90°C. Following filtration and evaporation of the solvent at reduced pressure, the crude product mixture was isolated. Following purification by column chromatography on silica gel using ethyl acetate-hexane (5:95) as eluant, **77** was obtained as a low melting solid (1.64 g, 70%), (Found C, 48.50; H, 7.24; N, 6.23; S, 14.63. C<sub>9</sub>H<sub>16</sub>NCIOS requires C, 48.75; H, 7.27; N, 6.32; S, 14.46%);  $\nu_{\max}/\text{cm}^{-1}$  (film) 3299, 2960, 1645 (CO), 1515, 1286;  $\delta_{\text{H}}$  (300 MHz) 1.01 (6H, d, *J* 6.6, 2 x CH<sub>3</sub>), 1.21 (3H, t, *J* 4.8, CH<sub>3</sub>CH<sub>2</sub>), 1.69-1.89 [1H, m, CH(CH<sub>3</sub>)<sub>2</sub>], 2.59 (2H, d, *J* 6.8, SCH<sub>2</sub>), 3.36-3.43 (2H, m, CH<sub>3</sub>CH<sub>2</sub>), 7.12 (1H, b s, NH), 7.62 [1H, s, C(3)HCl=];  $\delta_{\text{C}}$  (75.5 MHz) 14.7 (CH<sub>2</sub>CH<sub>3</sub>), 21.8 [2 x CH(CH<sub>3</sub>)<sub>2</sub>], 28.9 [CH(CH<sub>3</sub>)<sub>2</sub>], 35.0 (NCH<sub>2</sub>), 43.3 (SCH<sub>2</sub>), 132.7 [C(2)S], 136.5 [C(3)HCl=], 162.9 (CO); *m/z* (EI) 221 (M<sup>+</sup>, 6), 186 (20), 170 (22), 98 (100).

#### ***N*-4'-Fluorophenyl-Z-3-chloro-2-(*iso*-propylthio)propenamide 78**

This was prepared following the procedure (Method A) described for  $\beta$ -chloroacrylamide **3** using *N*-fluorophenyl-2-(*iso*-propylthio)propanamide **33** (1.42 g, 5.89 mmol), NCS (1.73 g, 11.49 mmol) and toluene (30 ml). The reaction solution was heated for 2 hours at 90°C. Following filtration and evaporation of the solvent at reduced pressure, the crude product mixture was isolated. After purification by column chromatography on silica gel using ethyl acetate-hexane (5:95) as eluant, **78** was obtained as a white solid (1.13 g, 70%), mp 45-47 °C; (Found C, 52.28; H, 4.79; N, 5.12; Cl, 13.26; F, 6.60; S, 12.08. C<sub>12</sub>H<sub>13</sub>NCLOFS requires C, 52.65; H, 4.79; N, 5.12; Cl, 12.95; F, 6.94; S, 11.71%);  $\nu_{\max}/\text{cm}^{-1}$  (KBr) 3326, 1672 (CO), 1509, 1212, 832;  $\delta_{\text{H}}$  (300 MHz) 1.34 [6H, d, *J* 6.7, CH(CH<sub>3</sub>)], 3.31-3.49 [1H, m, CH(CH<sub>3</sub>)<sub>2</sub>], 7.02-7.08 [2H, m, ArC(3')H], 7.53-7.57 [2H, m, ArC(2')H], 7.89 [1H, s, C(3)HCl=], 9.01 (1H, b s, NH);  $\delta_{\text{C}}$  (75.5 MHz) 23.3 [2 x CH(CH<sub>3</sub>)<sub>2</sub>], 39.6 [CH(CH<sub>3</sub>)<sub>2</sub>], 115.8 [d, <sup>2</sup>*J*<sub>CF</sub> 23, aromatic CH, ArC(3')], 121.7 [d, <sup>3</sup>*J*<sub>CF</sub> 8, aromatic CH, ArC(2')], 131.3 [C(2)S], 133.3 [d, <sup>4</sup>*J*<sub>CF</sub> 3, quaternary aromatic C, ArC(1')], 141.0 [C(3)HCl=], 159.8 [d, <sup>1</sup>*J*<sub>CF</sub> 248, quaternary aromatic C, ArC(4')], 161.4 (CO); *m/z* (EI) 273 (M<sup>+</sup>, 10), 164 (22), 135 (18), 111 (80).

*While the impurities in the SBn series have not been isolated and identified, minor signals in the NMR spectra consistent with trichloride or dichloroacrylamide impurities analogous to those described above can be seen in less than 10%. Typically, the crude products are 80-85%  $\beta$ -chloroacrylamide by <sup>1</sup>H NMR.*

#### **N-4'-Benzyl-Z-3-chloro-2-(benzylthio)propenamide 79**

This was prepared following the procedure (Method A) described for  $\beta$ -chloroacrylamide **3** using *N*-benzyl-2-(benzylthio)propanamide **34** (4.45 g, 15.6 mmol), NCS (4.06 g, 30.4 mmol) and toluene (80 ml). The reaction solution was heated for 2 hours at 90°C. Following filtration and evaporation of the solvent at reduced pressure, the crude product mixture was isolated. Following purification by column chromatography on silica gel using hexane-ethyl acetate as eluent (gradient elution 0-40% ethyl acetate), the pure  $\beta$ -chloroacrylamide **79** (3.94 g, 79%) was isolated as a white solid, mp 69-72°C;  $\nu_{\max}/\text{cm}^{-1}$  (KBr) 3343 (NH), 3030 (CH), 1645 (CO), 1556 (NH bend), 1518, 1421 (CN stretch);  $\delta_{\text{H}}$  (300 MHz) 3.90 (2H, s, SCH<sub>2</sub>), 4.32 (2H, d, *J* 5.9, CH<sub>2</sub>NH), 7.09-7.38 (11H, m, ArH, NH), 7.87 [1H, s, C(3)HCl=];  $\delta_{\text{C}}$  (75.5 MHz) 38.7 (SCH<sub>2</sub>), 44.5 (CH<sub>2</sub>NH), 128.0, 128.1, 128.2, 129.2, 129.2, 129.4

(aromatic CH), 131.0, 137.4, 137.9 [aromatic C or C(2)S], 139.9 [C(3)HCl=], 163.2 (CO);  $m/z$  (ESI) 340.0544 ( $[M+Na]^+$ ,  $C_{17}H_{16}NOSClNa$  requires 340.0539). 318 ( $[M+H]^+$ , 100%), 91 ( $C_7H_7^+$ , 40).

#### ***N*-4'-Fluorophenyl-*Z*-3-chloro-2-(benzylthio)propenamide 80**

The title compound was synthesized following the procedure described above for **3** using *N*-4'-fluorophenyl-2-(benzylthio)propanamide **35** (1.00 g, 3.5 mmol), *N*-chlorosuccinimide (0.90 g, 6.8 mmol) and toluene (50 ml). The reaction mixture was heated at 90°C for 2 hours. Following filtration and evaporation of the solvent at reduced pressure, the crude  $\beta$ -chloroacrylamide **80** was obtained as a brown solid. This was purified by column chromatography on silica gel using hexane-ethyl acetate (98:2) as eluent to give the pure product **80** (0.94 g, 84%) as a white solid, mp 81-82°C; (Found C, 59.31; H, 3.83; N, 4.06; S, 9.98; Cl, 10.79; F, 5.68.  $C_{16}H_{13}ClFNOS$  requires C, 59.72; H, 4.07; N, 4.37; S, 9.96; Cl, 11.02; F, 5.90%);  $\nu_{max}/cm^{-1}$  (KBr) 3317 (NH), 3054 (CH), 1647 (CO), 1605, 1519 (NH bend), 1508, 1406 (CN stretch);  $\delta_H$  (300 MHz) 3.97 (2H, s,  $SCH_2$ ), 6.96-7.01 (2H, m,  $ArH$ ), 7.16-7.33 (8H, m,  $ArH$ ), 7.97 [1H, s, C(3)HCl=], 8.55 (1H, b s, NH);  $\delta_C$  (75.5 MHz) 39.2 ( $SCH_2$ ), 116.0 [d,  $^2J_{CF}$  23, aromatic CH,  $ArC(3')$ ], 122.1 [d,  $^3J_{CF}$  8, aromatic CH,  $ArC(2')$ ], 128.3, 129.1, 129.3 (aromatic CH), 131.5 [C(2)S], 133.5, 137.4 (aromatic C), 141.5 [C(3)HCl=], 160.0 [d,  $^1J_{CF}$  244, aromatic C,  $ArC(4')$ ], 161.2 (CO);  $m/z$  (ESI) 322 ( $[M+H]^+$ , 10%), 91 ( $C_7H_7^+$ , 30).

#### ***N*-*n*-Butyl-*Z*-3-chloro-2-(benzylthio)propenamide 81**

This was prepared following the procedure described above for **3** using *N*-*n*-butyl-2-(benzylthio)propanamide **36** (1.00 g, 4.0 mmol), NCS (1.06 g, 7.8 mmol) and toluene (50 ml). The reaction mixture was heated at 90°C for 2 hours. Following filtration and evaporation of the solvent at reduced pressure, the crude  $\beta$ -chloroacrylamide **81** was obtained as a pale brown oil. This was purified by column chromatography on silica gel using hexane-ethyl acetate as eluent (gradient elution 2-10% ethyl acetate) to give the pure product **81** (0.66 g, 58%) as a pale yellow oil;  $\nu_{max}/cm^{-1}$  (film) 3309 (NH), 2951 (CH), 1648 (CO), 1560 (NH bend), 1518, 1454 (CN stretch);  $\delta_H$  (300 MHz) 0.90 [3H, t,  $J$  7.1,  $C(4')H_3$ ], 1.18-1.41 [4H, m,  $C(3')H_2$  and  $C(2')H_2$ ], 3.12 (2H, q,  $J$  6.8,  $CH_2NH$ ), 3.91 (2H, s,  $SCH_2$ ), 6.81 (1H, b s, NH), 7.18-7.34 (5H, m,  $ArH$ ),

7.82 [1H, s, C(3)HCl=];  $\delta_c$  (75.5 MHz) 13.7 [C(4')H<sub>3</sub>], 20.0 [C(3')H<sub>2</sub>], 31.3 [C(2')H<sub>2</sub>], 38.4, 39.7 (NCH<sub>2</sub> & S CH<sub>2</sub>), 127.7, 128.7, 128.8 (aromatic CH), 131.4, 137.2 [quaternary aromatic C and C(2)S], 139.0 [C(3)HCl=], 162.7 (CO); *m/z* (ESI) 306.0681 ([M+Na]<sup>+</sup>, C<sub>14</sub>H<sub>18</sub>NOSCINa requires 306.0695). 306 ([M+Na]<sup>+</sup>, 11%), 91 (C<sub>7</sub>H<sub>7</sub><sup>+</sup>, 100%).

The <sup>1</sup>H NMR spectra of the crude and pure product also contained a compound assigned as the *E* isomer although this has not been isolated and fully characterised (~20%);  $\delta_H$  (300 MHz) 0.90 [3H, t, *J* 7.1, C(4')H<sub>3</sub>]\*, 1.18-1.41 [4H, m, C(3')H<sub>2</sub> and C(2')H<sub>2</sub>]\*, 3.32 (2H, q, *J* 6.8, CH<sub>2</sub>NH), 3.91 (2H, s, SCH<sub>2</sub>), 6.15 (1H, bs, NH), 6.46 [1H, s, C(3)HCl=], 7.18-7.34 (5H, m, ArH)\*;  $\delta_c$  (75.5 MHz) 14.2 [C(4')H<sub>3</sub>], 21.1 [C(3')H<sub>2</sub>], 31.5 [C(2')H<sub>2</sub>], 38.9, 39.5 (NCH<sub>2</sub> & S CH<sub>2</sub>), 124.1, 127.6, 129.1 (aromatic CH), 131.6, 136.6 [quaternary aromatic C and C(2)S], 139.0 [C(3)HCl=], 163.4 (CO).

\*These signals were indistinguishable for the two isomers.

### ***N,N*-Dimethyl-*Z*-3-chloro-2-(benzylthio)propenamide **82** & *N,N*-Dimethyl-*E*-3-chloro-2-(benzylthio)propenamide **83****

This was synthesized according to the procedure described for **3** using *N,N*-dimethyl-2-(benzylthio)propanamide **37** (1.95 g, 9 mmol), *N*-chlorosuccinimide (2.32 g, 17 mmol) and toluene (50 ml). The reaction mixture was heated at 90 °C for 2 h. Following filtration and evaporation of the solvent at reduced pressure, the crude  $\beta$ -chloroacrylamide was obtained as a brown oil and as a mixture of the *Z*- and *E*-isomers in 1:0.35 ratio, as well as 10% of the dichloroacrylamide **106**. This was purified by column chromatography on silica gel using hexane-ethyl acetate as eluent (gradient elution 0-10% ethyl acetate) to give the sulfide **82** as the less polar fraction (1.04 g, 47%) as a pale yellow oil;  $\nu_{\max}/\text{cm}^{-1}$  (film) 3062 (CH), 1647 (CO), 1572, 1495, 1454 (CN stretch);  $\delta_H$  (300 MHz) 2.91 [3H, s, one of N(CH<sub>3</sub>)<sub>2</sub>], 3.00 [3H, s, one of N(CH<sub>3</sub>)<sub>2</sub>], 3.99 (2H, s, SCH<sub>2</sub>), 6.15 [1H, s, C(3)HCl=], 7.21-7.38 (5H, m, ArH),  $\delta_c$  (75.5 MHz) 34.8 [one of N(CH<sub>3</sub>)<sub>2</sub>], 37.6 [one of N(CH<sub>3</sub>)<sub>2</sub>], 38.2 (SCH<sub>2</sub>), 119.0 [C(2)HCl=], 127.8, 128.9, 129.5 (aromatic CH), 131.6, 137.2 [aromatic C or C(2)S], 165.5 (CO); *m/z* (ESI) 256.0563 ([M+H]<sup>+</sup>, C<sub>12</sub>H<sub>15</sub>NOSCl requires 256.0550). 256 ([M+H]<sup>+</sup>, 100%), 91 (C<sub>7</sub>H<sub>7</sub>, 30) {**82** contained ~12% of the dichloroacrylamide **106** seen at  $\delta_H$  2.69, 2.87 [2 x s, N(CH<sub>3</sub>)<sub>2</sub>]}. The second isomer **83** (0.38 g, 17%) was obtained as a pale yellow oil;  $\delta_H$  (300 MHz) 2.60 [3H, s, one of N(CH<sub>3</sub>)<sub>2</sub>], 2.83 [3H, s,

one of  $\text{N}(\text{CH}_3)_2$ , 3.99 (2H, s,  $\text{SCH}_2$ ), 6.17 [1H, s,  $\text{C}(3)\text{HCl=}$ ], 7.21-7.38 (5H, m,  $\text{ArH}$ ).

#### ***N*-4'-Methylphenyl-*Z*-3-chloro-2-(benzylthio)propenamide **84****

The title compound was prepared following the procedure described for **3** using *N*-4'-methylphenyl-2-(benzylthio)propanamide **38** (2.28 g, 8.0 mmol), *N*-chlorosuccinimide (2.08 g, 15.6 mmol) and toluene (40 ml). The reaction mixture was heated at 90 °C for 2 h. The crude  $\beta$ -chloroacrylamide **84** was obtained as a brown solid following filtration and evaporation of the solvent at reduced pressure. This was purified by column chromatography on silica gel using hexane-ethyl acetate (98:2) as eluent to give the pure product **84** (1.00 g, 39%\*) as a white solid, mp 84-86 °C; (Found C, 63.92; H, 5.023; N, 4.27; S, 10.23; Cl, 11.70.  $\text{C}_{17}\text{H}_{16}\text{ClNOS}$  requires C, 64.24; H, 5.07; N, 4.41; S, 10.09; Cl, 11.15%);  $\nu_{\text{max}}/\text{cm}^{-1}$  (KBr) 3277 (NH), 3052 (CH), 1647 (CO), 1594, 1521 (NH bend), 1403 (CN stretch);  $\delta_{\text{H}}$  (300 MHz) 2.31 (3H, s,  $\text{Ar-CH}_3$ ), 3.97 (2H, s,  $\text{SCH}_2$ ), 7.04-7.41 (9H, m,  $\text{ArH}$ ), 7.92 [1H, s,  $\text{C}(3)\text{HCl=}$ ], 8.56 (1H, b s, NH);  $\delta_{\text{C}}$  (75.5 MHz) 21.3 ( $\text{ArCH}_3$ ), 39.1 ( $\text{SCH}_2$ ), 120.4, 128.2, 129.1, 129.3, 129.8 (aromatic CH), 131.8, 134.9, 137.3 [aromatic C or  $\text{C}(2)\text{S}$ ], 140.8 [ $\text{C}(3)\text{HCl=}$ ], 161.1 (CO);  $m/z$  (ESI) 340.0555 ( $[\text{M}+\text{Na}]^+$ ,  $\text{C}_{17}\text{H}_{16}\text{NOS}^{35}\text{ClNa}$  requires 340.0539). 317 ( $[\text{M}+\text{H}]^+$ , 100%), 91 ( $\text{C}_7\text{H}_7^+$ , 20).

\* A yield of 70% was obtained on a batch that was later processed.

#### ***N*-Methyl-*Z*-3-chloro-2-(benzylthio)propenamide **85****

This was synthesized following the procedure described for **3** using *N*-4'-methyl-2-(benzylthio)propanamide **39** (4.00 g, 19 mmol), *N*-chlorosuccinimide (5.08 g, 37 mmol) and toluene (80 ml). The crude  $\beta$ -chloroacrylamide **85** was obtained as a brown oil following filtration and evaporation of the solvent at reduced pressure. This was purified by column chromatography on silica gel using hexane-ethyl acetate as eluent (gradient elution 20-60% ethyl acetate) to yield the pure product **85** (3.83 g, 83%) as a pale yellow oil;  $\nu_{\text{max}}/\text{cm}^{-1}$  (film) 3398 (NH), 2928 (CH), 1649 (CO), 1557 (NH bend), 1495, 1409 (CN stretch);  $\delta_{\text{H}}$  (300 MHz) 2.68 (3H, d,  $J$  5.0,  $\text{CH}_3\text{NH}$ ), 3.97 (2H, s,  $\text{SCH}_2$ ), 6.77 (1H, b s, NH), 7.19-7.37 (5H, m,  $\text{ArH}$ ), 7.82 [1H, s,  $\text{C}(3)\text{HCl=}$ ];  $\delta_{\text{C}}$  (75.5 MHz) 27.1 ( $\text{CH}_3\text{NH}$ ), 39.0 ( $\text{SCH}_2$ ), 128.1, 129.1, 129.2 (aromatic CH), 131.5, 137.5 [aromatic C or  $\text{C}(2)\text{S}$ ], 139.5 [ $\text{C}(3)\text{HCl=}$ ], 163.9 (CO).

The  $^1\text{H}$  NMR spectra of the crude and pure product also contained a compound assigned as the *E* isomer although this has not been isolated and fully characterised (~15%);  $\delta_{\text{H}}$  (300 MHz) 2.91 (3H, d,  $J$  4.9,  $\text{CH}_3\text{NH}$ ), 3.90 (2H, s,  $\text{SCH}_2$ ), 6.15 (1H, bs,  $\text{NH}$ ), 6.48 [1H, s,  $\text{C}(3)\text{HCl=}$ ].

### ***N*-Phenyl-*Z*-3-chloro-2-(benzylthio)propenamide 86**

The title compound was synthesized following the procedure outlined for **3** using *N*-phenyl-2-(benzylthio)propanamide **40** (3.00 g, 11 mmol), *N*-chlorosuccinimide (2.94 g, 21.6 mmol) and toluene (120 ml). The reaction mixture was heated at 90 °C for 2 h. Following filtration and evaporation of the solvent at reduced pressure, the crude product **86** was obtained as a brown oil. This was purified by column chromatography on silica gel using hexane-ethyl acetate as eluent (gradient elution 0-5% ethyl acetate) to yield the pure  $\beta$ -chloroacrylamide **86** (2.61 g, 78%) as a white solid, mp 81-82°C; (Found C, 62.95; H, 4.65; Cl, 11.80; N, 4.34; S, 10.32.  $\text{C}_{16}\text{H}_{14}\text{ClNOS}$  requires C, 63.25; H, 4.64; Cl, 11.67; N, 4.61; S, 10.55%);  $\nu_{\text{max}}/\text{cm}^{-1}$  (KBr) 3343 (NH), 1655 (CO), 1599, 1525 (NH bend), 1494, 1441 (CN stretch);  $\delta_{\text{H}}$  (300 MHz) 3.98 (2H, s,  $\text{SCH}_2$ ), 7.06-7.43 (10H, m,  $\text{ArH}$ ), 7.95 [1H, s,  $\text{C}(3)\text{HCl=}$ ], 8.61 (1H, b s,  $\text{NH}$ );  $\delta_{\text{C}}$  (75.5 MHz) 39.1 ( $\text{SCH}_2$ ), 120.3, 125.2, 128.3, 129.1, 129.3, 129.4 (aromatic CH), 131.8, 137.3, 137.5 [aromatic C or  $\text{C}(2)\text{S}$ ], 141.1 [ $\text{C}(3)\text{HCl=}$ ], 161.2 (CO);  $m/z$  (ESI) 304 ( $[\text{M}+\text{H}]^+$ , 100%), 91 ( $\text{C}_7\text{H}_7^+$ , 70).

### ***Z*-3-Chloro-2-(benzylthio)propenamide 87**

This was prepared following the procedure described for **3** using 2-(benzylthio)propanamide **41** (0.50 g, 2.6 mmol), *N*-chlorosuccinimide (0.68 g, 5 mmol) and toluene (20 ml). Following filtration and evaporation of the solvent at reduced pressure, the crude product **87** was obtained as a yellow oil. This was purified by column chromatography on silica gel using hexane-ethyl acetate as eluent (gradient elution 0-40% ethyl acetate) to yield the pure  $\beta$ -chloroacrylamide **87** (0.30 g, 51%) as a white solid, mp 72-74°C; (Found C, 52.62; H, 4.52; Cl, 15.82; N, 6.31; S, 13.85.  $\text{C}_{10}\text{H}_{10}\text{ClNOS}$  requires C, 52.75; H, 4.43; Cl, 15.57; N, 6.15; S, 14.08%);  $\nu_{\text{max}}/\text{cm}^{-1}$  (KBr) 3391 (NH), 3298 (NH), 1650 (CO), 1618 (NH bend), 1495, 1417 (CN stretch);  $\delta_{\text{H}}$  (300 MHz) 3.96 (2H, s,  $\text{SCH}_2$ ), 5.38 (1H, b s,  $\text{NH}$ ), 6.72 (1H, b s,  $\text{NH}$ ), 7.19-7.41 (5H, m,  $\text{ArH}$ ), 7.82 [1H, s,  $\text{C}(3)\text{HCl=}$ ];  $\delta_{\text{C}}$  (75.5 MHz) 38.8 ( $\text{SCH}_2$ ),

128.1, 129.2, 129.3 (aromatic CH), 131.1, 137.2 [aromatic C or C(2)S], 140.4 [C(3)HCl=], 165.8 (CO);  $m/z$  (ESI) 228 ([M+H]<sup>+</sup>, 100%), 91 (C<sub>7</sub>H<sub>7</sub><sup>+</sup>, 56).

### ***N*-4'-Fluorophenyl-*Z*-3-chloro-2-(methylthio)propenamide **88****

#### Method F

Unrecrystallised NCS (5.64 g, 42.50 mmol) was added in one portion to a solution of the sulfide **42** (5.00 g, 23.50 mmol) in toluene (100 ml). The flask was immediately immersed in an oil bath at 90°C and heating was maintained for 2 hours with stirring. The reaction mixture was cooled to 0°C and the succinimide by-product removed by filtration. The solvent was evaporated at reduced pressure to give the β-chloroacrylamide **88** as a brown solid. The <sup>1</sup>H NMR of the crude product showed the composition of the mixture to be 70% **88**, 20% dichloroacrylamide **117** (evidence for presence at δ<sub>H</sub> 2.34) and 10% dichloride **118** (δ<sub>H</sub> 4.07, 4.12, ABq, *J* 11, CH<sub>2</sub>Cl). The product was purified by chromatography on silica gel using ethyl acetate-hexane (5:95) as eluent to give the β-chloroacrylamide **88** as a white solid (3.50 g, 61 %), mp 89-91 °C; (Found C, 48.55; H, 3.69; N, 5.84; Cl, 14.04; F, 7.73; S, 13.28. C<sub>10</sub>H<sub>9</sub>NCIFOS requires C, 48.88; H, 3.69; N, 5.70; Cl, 14.43; F, 7.73; S, 13.05%);  $\nu_{\max}/\text{cm}^{-1}$  (KBr) 3339, 1652 (CO), 1507, 1211; δ<sub>H</sub> (300 MHz) 2.31 (3H, s, SCH<sub>3</sub>), 7.02-7.09 [2H, m, ArC(3')H], 7.54-7.60 [2H, m, ArC(2')H], 7.84 [1H, s, C(3)HCl=], 9.01 (1H, b s, NH); δ<sub>C</sub> (75.5 MHz) 17.35 (SCH<sub>3</sub>), 115.9 [d, <sup>2</sup>*J*<sub>CF</sub> 22, aromatic CH, ArC(3')], 121.8 [d, <sup>3</sup>*J*<sub>CF</sub> 8, aromatic CH, ArC(2')], 133.2 [d, <sup>4</sup>*J*<sub>CF</sub> 3, quaternary aromatic C, ArC(1')], 134.0 [C(2)S], 139.1 [C(3)HCl=], 159.7 [d, <sup>1</sup>*J*<sub>CF</sub> 245, quaternary aromatic C, ArC(4')], 160.7 (CO);  $m/z$  (EI) 245 (M<sup>+</sup>, 20%), 210 (30), 135 (22), 107 (100).

During optimization studies, characteristic signals for the acrylamide **116** were seen at δ<sub>H</sub> 6.45 (s, one of CH<sub>2</sub>=) and 5.58 (s, one of CH<sub>2</sub>=).

### ***N*-Benzyl-*Z*-3-chloro-2-(methylthio)propenamide **89****

This was prepared following the procedure (Method F) described for β-chloroacrylamide **88** using sulfide **43** (2.00 g, 9.57 mmol), NCS (2.30 g, 17.22 mmol) and toluene (40 ml). The reaction solution was heated for 2 hours at 90°C. Following filtration and evaporation of the solvent at reduced pressure, the crude product mixture was isolated. The <sup>1</sup>H NMR of the crude product showed the composition of

the mixture to be 75% **89**, 15% dichloroacrylamide **107** ( $\delta_{\text{H}}$  2.28) and 5% acrylamide **108** ( $\delta_{\text{H}}$  5.41 and 6.31). Following purification by column chromatography on silica gel using hexane-ethyl acetate (80:20) as eluent, the pure  $\beta$ -chloroacrylamide **89** (1.57 g, 68%) was isolated as a colourless oil, (Found C, 54.54; H, 4.98; N, 5.72; Cl, 14.31; S, 13.55.  $\text{C}_{11}\text{H}_{12}\text{NCIOS}$  requires C, 54.65; H, 5.00; N, 5.79; Cl, 14.67; S, 13.26%);  $\nu_{\text{max}}/\text{cm}^{-1}$  (film) 3302 (NH), 1651 (CO), 1515, 1278;  $\delta_{\text{H}}$  (300 MHz) 2.31 (3H, s, SCH<sub>3</sub>), 4.52 (2H, d,  $J$  5.9, CH<sub>2</sub>NH), 7.19-7.51 (6H, m, ArH, NH), 7.75 [1H, s, C(3)HCl=];  $\delta_{\text{C}}$  (75.5 MHz) 17.5 (SCH<sub>3</sub>), 44.6 (CH<sub>2</sub>NH), 128.1, 128.2, 129.2, (aromatic CH), 133.7 [C(2)S], 137.2 [C(3)HCl=], 138.0 (quaternary aromatic C), 163.1 (CO);  $m/z$  (EI) 241 ( $\text{M}^+$ , 2), 206 (60), 158 (90), 91 (100).

#### ***N*-*n*-Butyl-*Z*-3-chloro-2-(methylthio)propenamide 90**

This was prepared following the procedure (Method F) described for  $\beta$ -chloroacrylamide **88** using sulfide **44** (5.0 g, 28.5 mmol), NCS (7.4 g, 55.6 mmol) and toluene (100 ml). The reaction solution was heated for 2 hours at 90°C. Following filtration and evaporation of the solvent at reduced pressure, the crude product mixture was isolated. The <sup>1</sup>H NMR spectrum of the crude product showed the composition of the mixture to be 76% **90**, 23% dichloroacrylamide **109** and 1% acrylamide **110** ( $\delta_{\text{H}}$  5.38 and 6.26). Following purification by column chromatography on silica gel using hexane-ethyl acetate (80:20) as eluent, the pure  $\beta$ -chloroacrylamide **90** (3.9 g, 65%) was isolated as a colourless oil; (Found C, 46.43; H, 6.67; N, 6.48; Cl, 17.36; S, 15.36.  $\text{C}_8\text{H}_{14}\text{NCIOS}$  requires C, 46.26; H, 6.79; N, 6.74; Cl, 17.07; S, 15.44%);  $\nu_{\text{max}}/\text{cm}^{-1}$  (film) 3307 (NH), 1644 (CO), 1519;  $\delta_{\text{H}}$  (300 MHz) 0.98 [3H, t,  $J$  7.3, C(4')H<sub>3</sub>], 1.29-1.48 [2H, m, C(3')H<sub>2</sub>], 1.51-1.69 [2H, m, C(2')H<sub>2</sub>], 2.28 (3H, s, SCH<sub>3</sub>), 3.41 (2H, q,  $J$  6.0, NCH<sub>2</sub>), 7.12 (1H, bs, NH), 7.68 [1H, s, C(3)HCl=];  $\delta_{\text{C}}$  (75.5 MHz) 14.1 [C(4')H<sub>3</sub>], 17.4 (SCH<sub>3</sub>), 20.5 [C(3')H<sub>2</sub>], 31.9 [C(2')H<sub>2</sub>], 40.3 (NCH<sub>2</sub>), 133.9 [C(2)S], 136.1 [C(3)HCl=], 163.0 (CO);  $m/z$  (ESI) 207.04828 ( $[\text{M}]^+$ ,  $\text{C}_8\text{H}_{14}\text{NOSCl}$  requires 207.048246. 207 ( $\text{M}^+$ , 15%), 172 (55%), 135 (56%), 107 (81%).

#### ***N*-Isopropyl-*Z*-3-chloro-2-(methylthio)propenamide 91**

This was prepared following the procedure (Method F) described for  $\beta$ -chloroacrylamide **88** using sulfide **45** (2.30 g, 15.86 mmol), NCS (3.81 g, 28.55

mmol) and toluene (60 ml). The reaction solution was heated for 2 hours at 90°C. Following filtration and evaporation of the solvent at reduced pressure, the crude product mixture was isolated. Following purification by column chromatography on silica gel using hexane-ethyl acetate (80:20) as eluent, the pure  $\beta$ -chloroacrylamide **91** (1.80 g, 60%) was isolated as a white solid, mp 52-54 °C; (Found C, 43.11; H, 6.15; N, 7.11; S, 16.90.  $C_7H_{12}NCIOS$  requires C, 43.41; H, 6.24; N, 7.23; S, 16.55%);  $\nu_{\max}/\text{cm}^{-1}$  (KBr) 3396 (NH), 1656 (CO), 1613, 1211;  $\delta_{\text{H}}$  (300 MHz) 1.25 [6H, d,  $J$  6.5,  $\text{CH}(\text{CH}_3)_2$ ], 2.29 (3H, s,  $\text{SCH}_3$ ), 4.12-4.19 [1H, m,  $\text{CH}(\text{CH}_3)_2$ ], 6.89 (1H, bs, NH), 7.61 [1H, s,  $\text{C}(3)\text{HCl=}$ ];  $\delta_{\text{C}}$  (75.5 MHz) 17.0 ( $\text{SCH}_3$ ), 22.6 [ $\text{CH}(\text{CH}_3)_2$ ], 42.2 [ $\text{CH}(\text{CH}_3)_2$ ], 133.6 [ $\text{C}(2)\text{S}$ ], 135.5 [ $\text{C}(3)\text{HCl=}$ ], 162.3 (CO).

#### ***N*-4'-Methylphenyl -Z-3-chloro-2-(methylthio)propenamide **92****

This was prepared following the procedure (Method F) described for  $\beta$ -chloroacrylamide **88** using sulfide **46** (2.00 g, 9.58 mmol), NCS (2.59 g, 18.68 mmol) and toluene (40 ml). The reaction solution was heated for 2 hours at 90°C. Following filtration and evaporation of the solvent at reduced pressure, the crude product mixture was isolated. Following purification by column chromatography on silica gel using hexane-ethyl acetate (80:20) as eluent, the pure  $\beta$ -chloroacrylamide **92** (1.45 g, 60%) was isolated as a white solid, mp 103-104 °C; (Found C, 55.50; H, 4.84; N, 5.59.  $C_{11}H_{12}NCIOS$  requires C, 55.10; H, 4.62; N, 5.84%);  $\nu_{\max}/\text{cm}^{-1}$  (KBr) 3020 (NH), 1645 (CO), 1600, 1512, 1405, 1263, 822;  $\delta_{\text{H}}$  (300 MHz) 2.36 (3H, s,  $\text{CH}_3$ ), 2.43 (3H, s,  $\text{SCH}_3$ ), 7.15-7.18 (2H, m, ArH), 7.47-7.50 (2H, m, ArH), 7.79 [1H, s,  $\text{C}(3)\text{HCl=}$ ], 8.93 (1H, bs, NH);  $\delta_{\text{C}}$  (75.5 MHz) 17.6 ( $\text{SCH}_3$ ), 21.3 ( $\text{ArCH}_3$ ), 120.4, 130.0 (aromatic CH), 130.1, 133.9, 135.1 ( $\text{SC=}$  and quaternary aromatic C), 138.1 [ $\text{C}(3)\text{HCl=}$ ], 161.0 (CO);  $m/z$  (EI) 241/243 ( $\text{M}^+$ ).

***N*-4'-Methylphenyl-Z-3-chloro-2-(phenylthio)-2-butenamide **93**, *N*-4'-Methylphenyl-E-3-chloro-2-(phenylthio)-2-butenamide **94**, *N*-4'-Methylphenyl-2-(phenylthio)-2-butenamide **111** and *N*-4'-Methylphenyl-2,3,3-trichloro-2-(phenylthio)-2-butanamide **112**.**

A) Using carbon tetrachloride as solvent

This reaction was conducted following the procedure described for  $\beta$ -chloroacrylamide **57** using sulfide **47** (170 mg, 0.6 mmol), NCS (167 mg, 1.25 mmol)

and carbon tetrachloride (4 ml) to give a mixture of acrylamides (165 mg, 87 %). Separation of the mixture by chromatography using ethyl acetate-hexane (3:97) as eluent gave *N*-4'-methylphenyl-*E*-3-chloro-2-(phenylthio)-2-butenamide **94** (tentatively assigned) (36.9 mg, 19 %) (Rf 0.5 using ethyl acetate-hexane (25:75) as eluent) as a white, crystalline solid, mp 128-129 °C; (Found C, 64.89; H, 5.13; N, 4.20. C<sub>17</sub>H<sub>16</sub>ClNOS requires C, 64.24; H, 5.07; N, 4.41%);  $\nu_{\max}/\text{cm}^{-1}$  (KBr) 3234 (br NH), 1654, 1600 (CO  $\alpha,\beta$ -unsaturated amide);  $\delta_{\text{H}}$  (270 MHz) 2.28 (3H, s, ArCH<sub>3</sub>), 2.55 [3H, s, C(4)H<sub>3</sub>], 7.00-7.43 (9H, m, ArH), 7.56 (1H, br s, NH);  $\delta_{\text{C}}$  (67.8 MHz) 20.8 (ArCH<sub>3</sub>), 25.3 (C(4)H<sub>3</sub>), 120.2 (aromatic CH), 126.1 [C(2)S], 127.7, 129.4, 129.8, 130.0 (aromatic CH), 133.0, 134.4, 134.6 (quaternary aromatic C), 139.9 (CCl=), 162.4 (CO);  $m/z$  (EI) 317 (M<sup>+</sup>, 95%), 282 (20, M<sup>+</sup>- Cl), 211 (29), 183 (79), 147 (100, [PhS=C=C=CH<sub>2</sub>]<sup>+</sup>), 107 (80), 91 (17), 77 (29) and *N*-4'-Methylphenyl-*Z*-3-chloro-2-(phenylthio)-2-butenamide **93** (51.4 mg, 27 %, more polar, colourless solid), mp 124-126 °C; (Found C, 64.37; H, 5.01, N, 4.47. C<sub>17</sub>H<sub>16</sub>ClNOS requires C, 64.24; H, 5.07; N, 4.41%);  $\nu_{\max}/\text{cm}^{-1}$  (KBr) 3272 (br NH), 1656 (CO  $\alpha,\beta$ -unsaturated amide);  $\delta_{\text{H}}$  (270 MHz) 2.31 (3H, s, ArCH<sub>3</sub>), 2.65 [3H, s, C(4)H<sub>3</sub>], 7.03-7.45 (9H, m, ArH), 8.14 (1H, br s, NH);  $\delta_{\text{C}}$  (67.8 MHz) 20.8 (ArCH<sub>3</sub>), 25.8 [C(4)H<sub>3</sub>], 120.3 (aromatic CH), 126.5 [C(2)S], 127.5 (aromatic CH), 129.4 (aromatic CH), 132.9, 134.5 (quaternary aromatic C), 147.2 (CCl=), 162.0 (CO);  $m/z$  (EI) 317 (M<sup>+</sup>, 95%), 282 (28, M<sup>+</sup>- Cl), 183 (75), 147 (100, [PhS=C=C=CH<sub>2</sub>]<sup>+</sup>), 107 (88), 91 (22), 77 (56); and *N*-4'-methylphenyl-2-(phenylthio)-*Z*-2-butenamide **111** (as a single isomer) (34 mg, 20%) (Rf 0.45), mp 104- 106 °C;  $\nu_{\max}/\text{cm}^{-1}$  (KBr) 3232 (br NH), 1653, 1599 (CO  $\alpha,\beta$ -unsaturated amide);  $\delta_{\text{H}}$  (270 MHz) 2.14 (3H, d,  $J$  7, CH<sub>3</sub>CH=), 2.28 (3H, s, ArCH<sub>3</sub>), 7.00-7.44 (9H, m, ArH), 7.85 (1H, q,  $J$  7, CH=), 8.83 (1H, br s, NH);  $\delta_{\text{C}}$  (67.8 MHz) 16.9 [C(4)H<sub>3</sub>], 20.0 (ArCH<sub>3</sub>), 120.1, 126.4, 126.3 (aromatic CH), 127.4 (PhSC=), 129.4 (aromatic CH), 134.1, 134.5, 135.1 (quaternary aromatic C), 148.9 (CH=), 162.2 (CO);  $m/z$  (ESI) 283.10239 ([M]<sup>+</sup>, C<sub>17</sub>H<sub>17</sub>NOS requires 283.10309. 283 (M<sup>+</sup>, 17%), 262 (37), 183 (28), 149 (17), 134 (78).

#### B) Using toluene as solvent

This was prepared following the procedure (method A) described for  $\beta$ -chloroacrylamide **3** using sulfide **47** (2.75 g, 9.7 mmol), NCS (2.71 g, 20.3 mmol) and toluene (80 ml) to give crude mixture of acrylamides **93** & **94** and trichloride **112**

(3.70 g). Purification by chromatography using ethyl acetate-hexane (10:90) as eluent gave the *E*- $\beta$ -chloroacrylamide **94** (1.13 g, 41 %), *Z*- $\beta$ -chloroacrylamide **93** (0.70 g, 23 %) and *N*-4'-methylphenyl-2-(phenylthio)-2,3,3-trichlorobutanamide **112** (0.34 g, 9 %) as a viscous oil;  $\nu_{\max}/\text{cm}^{-1}$  (film) 3405 (br NH), 1691, 1594 (CO amide);  $\delta_{\text{H}}$  (270 MHz) 2.30 (3H, s, ArCH<sub>3</sub>), 2.77 [3H, s, C(4)H<sub>3</sub>], 7.07-7.69 (9H, m, ArH), 8.40 (1H, br s, NH);  $\delta_{\text{C}}$  (67.8 MHz) 21.2 (ArCH<sub>3</sub>), 36.4 [C(4)H<sub>3</sub>], 93.4, 94.5 (CCl<sub>2</sub> and CClS), 120.9 (aromatic CH), 128.8 (quaternary aromatic C), 129.4, 129.8, 131.1 (aromatic CH), 134.0, 135.7 (quaternary aromatic C and PhSC=), 137.7 (aromatic CH), 161.1 (CO);  $m/z$  (ESI) 387.00201 ([M]<sup>+</sup>, C<sub>17</sub>H<sub>16</sub>NOSCl<sub>3</sub> requires 387.00182. 387 (M<sup>+</sup>, 33%), 317 (18, M<sup>+</sup>-2Cl), 282 (5, M<sup>+</sup>-3Cl), 218 (100, [PhS=CCl=CClCH<sub>3</sub>]<sup>+</sup>), 148 (47), 106 (59).

***N*-4'-Methylphenyl-*Z*-3-chloro-2-(phenylthio)-2-pentenamide 95, *N*-4'-methylphenyl-*E*-3-chloro-2-(phenylthio)-2-pentenamide 96, *N*-4'-methylphenyl-2-(phenylthio)-2-pentenamide 122 and *N*-4'-methylphenyl-2-(phenylthio)-2,3,3-trichloropentanamide 121**

A) Using carbon tetrachloride as solvent

This was conducted following the procedure (method E) described for  $\beta$ -chloroacrylamide **57** using *N*-4'-methylphenyl-2-(phenylthio)pentanamide **48** (100 mg, 0.33 mmol), NCS (98 mg, 0.74 mmol) and carbon tetrachloride (2 ml) with a reaction time of 20 h, to give a mixture of acrylamides. Purification by chromatography using ethyl acetate-hexane (10:90) to (25:75) as eluent gave *N*-4'-methylphenyl-*E*-3-chloro-2-(phenylthio)-2-pentenamide **96** (tentatively assigned) (13.8 mg, 17 %) (R<sub>f</sub> 0.6 using ethyl acetate-hexane (25:75) as eluent) as a white, crystalline solid, mp 146-147 °C; (Found C, 65.09; H, 5.47; N, 4.18. C<sub>18</sub>H<sub>18</sub>ClNOS requires C, 65.15; H, 5.47; N, 4.22%);  $\nu_{\max}/\text{cm}^{-1}$  (KBr) 3270 (br NH), 1657 (CO), 1603;  $\delta_{\text{H}}$  (270 MHz) 1.23 [3H, t, *J* 7, C(5)H<sub>3</sub>], 2.29 (3H, s, ArCH<sub>3</sub>), 2.93 [2H, q, *J* 7, C(4)H<sub>2</sub>], 6.97-7.43 (9H, m, ArH), 7.57 (1H, br s, NH);  $\delta_{\text{C}}$  (67.8 MHz) 12.3 [C(5)H<sub>3</sub>], 20.8 (ArCH<sub>3</sub>), 31.4 [C(4)H<sub>2</sub>], 120.2 (aromatic CH), 125.3 (quaternary aromatic C), 127.7, 129.4, 129.6, 129.7 (aromatic CH), 133.1, 134.4, 134.6 [quaternary aromatic C and C(2)S], 145.7 [C(3)Cl=], 162.4 (CO);  $m/z$  (EI) 331 (M<sup>+</sup>, 100 %), 296 (15, M<sup>+</sup>-Cl), 225 (27), 197 (68), 161 (58, [PhS=C=C=CHCH<sub>3</sub>]<sup>+</sup>), 107 (58), 91 (33), 77 (28); *N*-

4'-methylphenyl-Z-3-chloro-2-(phenylthio)-2-pentenamide **95** (tentatively assigned) (contains trace acrylamide **122**) (11 mg, 13 %) (Rf 0.4) as a white, crystalline solid. *Note: This compound formed a gel in some test tubes as it was eluted; 86 mg were held in 9.5 ml eluent (ethyl acetate-hexane (25:75))*, mp 114-6 °C;  $\nu_{\max}/\text{cm}^{-1}$  (KBr) 3293 (br NH), 1646 (CO), 1607;  $\delta_{\text{H}}$  (270 MHz) 1.30 [3H, t,  $J$  7, C(5) $H_3$ ], 2.27 (3H, s, ArCH<sub>3</sub>), 2.93 [2H, q,  $J$  7, C(4) $H_2$ ], 7.02-7.45 (9H, m, ArH), 8.03 (1H, br s, NH);  $\delta_{\text{C}}$  (67.8 MHz) 13.1 [C(5) $H_3$ ], 20.8 (ArCH<sub>3</sub>), 31.9 [C(4) $H_2$ ], 120.3 (aromatic CH), 126.3 (PhSC=), 127.5, 129.4, 129.7, 129.6 (aromatic CH), 132.8, 134.5, (quaternary aromatic C), 152.3 (CCl=), 162.0 (CO);  $m/z$  (EI) 331 ( $M^+$ , 22%), 296 (2,  $M^+$ -Cl), 161 (17, [PhS=C=C=CHCH<sub>3</sub>]<sup>+</sup>), 134 (28), 91 (25), 77 (33); *N*-4'-methylphenyl-2-(phenylthio)-Z-2-pentenamide **122** (tentatively assigned) (44 mg, 54 %) (Rf 0.5) as a white, crystalline solid, mp 66-68 °C; (Found C, 72.31; H, 6.38; N, 4.77; S, 11.25. C<sub>18</sub>H<sub>19</sub>NOS requires C, 72.69; H, 6.44; N, 4.71; S, 10.78%);  $\nu_{\max}/\text{cm}^{-1}$  (KBr) 3339 (br NH), 1657 (CO), 1610;  $\delta_{\text{H}}$  (270 MHz) 1.11 [3H, t,  $J$  7, C(5) $H_3$ ], 2.29 (3H, s, ArCH<sub>3</sub>), 2.42-2.60 [2H, dq,  $J$  8,7, C(4) $H_2$ ], 7.07-7.35 (9H, m, ArH), 7.74 (1H, t,  $J$  8, CH=), 8.80 (1H, br s, NH);  $\delta_{\text{C}}$  (67.8 MHz) 12.8 [C(5) $H_3$ ], 20.8 (ArCH<sub>3</sub>), 24.5 [C(4) $H_2$ ], 120.1 (aromatic CH), 125.7 (PhSC=), 126.3, 126.9, 129.4, (aromatic CH), 134.1, 134.7, 135.1 (quaternary aromatic C and PhSC=), 155.1 (CH=), 162.2 (CO);  $m/z$  (EI) 297 ( $M^+$ , 100%), 163 (62), 148 (52), 121 (66), 107 (58), 91 (30), 77 (29).

#### B) Using toluene as solvent

This was conducted following the procedure described for  $\beta$ -chloroacrylamide **3** by method A using *N*-4'-methylphenyl-2-(phenylthio)pentanamide **48** (300 mg, 1.0 mmol), NCS (280 mg, 2.1 mmol) and toluene (7 ml) to give the crude product as a low melting solid (420 mg). Purification by chromatography using ethyl acetate-hexane (10:90) as eluent gave *N*-4'-methylphenyl-*E*-3-chloro-2-(phenylthio)-2-pentenamide **96** (with trace acrylamide **122**) (65 mg, 20 %), *N*-4'-methylphenyl-2-(phenylthio)-Z-2-pentenamide **122** (30 mg, 10 %), *N*-4'-methylphenyl-Z-3-chloro-2-(phenylthio)-2-pentenamide **95** (154 mg, 47 %), and *N*-4'-methylphenyl-2-(phenylthio)-2,3,3-trichloropentanamide **121** (38 mg, 10 %) as an off-white solid, mp 108-110 °C; (Found C, 53.68; H, 4.70; N, 3.38; S, 7.85; Cl, 26.40. C<sub>18</sub>H<sub>18</sub>Cl<sub>3</sub>OS requires C, 53.69; H, 4.51; N, 3.48; S, 7.96; Cl, 26.41%);  $\nu_{\max}/\text{cm}^{-1}$  (neat) 3404 (br NH), 1690, 1594 (CO amide);  $\delta_{\text{H}}$  (270 MHz) 1.38 [3H, t,  $J$  7, C(5) $H_3$ ], 2.33 (3H, s,

ArCH<sub>3</sub>), 2.70-2.80 [1H, m, C(4)H<sub>2</sub>], 7.08-7.69 (9H, m, ArH), 8.48 (1H, br s, NH);  $\delta_c$  (67.8 MHz) 10.7 [C(5)H<sub>3</sub>], 20.9 (ArCH<sub>3</sub>), 37.8 [C(4)H<sub>2</sub>], 95.6, 99.3 (CCl<sub>2</sub> and CClSPh), 120.7 (aromatic CH), 128.5 (quaternary aromatic C), 129.0, 129.4, 130.7 (aromatic CH), 133.8, 135.3 (quaternary aromatic C), 137.4 (aromatic CH), 161.4 (CO); MS  $m/z$  401 (M<sup>+</sup>, 1 %), 331 (2, M<sup>+</sup>-2 Cl), 242 (23), 197 (10), 155 (100), 91 (20).

**(1'S)-N-1'-Phenylethyl-Z-3-chloro-2-(phenylthio)-2-pentenamide 97 and (S)-N-1'-phenylethyl-E-3-chloro-2-(phenylthio)-2-pentenamide 98**

This was prepared following the procedure (method B) described for  $\beta$ -chloroacrylamide **57** using (1'S)-N-1'-phenylethyl-2-(phenylthio)pentanamide **49** (1:1 mixture of diastereomers) (2.01 g, 6.4 mmol), NCS (1.71 g, 12.8 mmol) and carbon tetrachloride (40 ml) to give mixture of acrylamides (2.09 g, 89 % crude). Purification by chromatography using ethyl acetate-hexane (10:90) as eluent gave (1'S)-N-1'-phenylethyl-E-3-chloro-2-(phenylthio)-2-pentenamide **98** (tentatively assigned) (R<sub>f</sub> 0.4 using ethyl acetate-hexane (25:75) as eluent) (0.29 g, 13 %) as a white, crystalline solid, mp 80-83 °C;  $[\alpha]_D^{20}$  4.74 (c 0.08 in EtOH); (Found C, 66.35; H, 5.68; N, 4.22; S, 9.40. C<sub>19</sub>H<sub>20</sub>ClNOS requires C, 65.98; H, 5.83; N, 4.05; S 9.27%);  $\nu_{\max}/\text{cm}^{-1}$  (KBr) 3254 (br NH), 1635 (CO  $\alpha,\beta$ -unsaturated amide);  $\delta_H$  (270 MHz, CD<sub>2</sub>Cl<sub>2</sub>) 1.11-1.35 [6H, m, C(5)H<sub>3</sub>, C(2')H<sub>3</sub>], 2.77 [2H, q,  $J$  7, C(4)H<sub>2</sub>], 4.78 [1H, m, C(1')H], 6.46 (1H, br s, NH), 7.20-7.29 (10H, m, ArH);  $\delta_c$  (67.8 MHz, CD<sub>2</sub>Cl<sub>2</sub>) 13.04 [C(5)H<sub>3</sub>], 22.2 [C(2')H<sub>3</sub>], 32.0 [C(4)H<sub>2</sub>], 50.0 [C(1')H], 126.2, 128.1, 128.2, 128.7, 129.5, 130.7 (aromatic CH), 133.5, 140.0, 143.3, 149.2 (quaternary aromatic C, PhSC= and CCl=), 163.5 (CO);  $m/z$  (EI) 345 (M<sup>+</sup>, 37%), 310 (13, M<sup>+</sup>- Cl), 161 (18, [PhS=C=C=CHCH<sub>3</sub>]<sup>+</sup>), 105 (100, [CHCH<sub>3</sub>Ph]<sup>+</sup>); (1'S)-N-1'-phenylethyl-Z-3-chloro-2-(phenylthio)-2-pentenamide **97** (tentatively assigned) (R<sub>f</sub> 0.3) (0.54 g, 27 %), mp 95-98 °C;  $[\alpha]_D^{20}$  52.6 (c 0.08 in EtOH),  $\nu_{\max}/\text{cm}^{-1}$  (KBr) 3264 (br NH), 1638 (CO  $\alpha,\beta$ -unsaturated amide);  $\delta_H$  (270 MHz) 1.19 [3H, d,  $J$  7, C(2')H<sub>3</sub>], 1.26 [3H, t,  $J$  7, C(5)H<sub>3</sub>], 2.83 [2H, q,  $J$  7, C(4)H<sub>2</sub>], 4.88-5.01 [1H, dq,  $J$  7, 7, C(1')H], 6.05 (1H, br s, NH), 7.03-7.38 (10H, m, ArH);  $\delta_c$  (67.8 MHz) 12.4 [C(5)H<sub>3</sub>], 21.5 [C(2')H<sub>3</sub>], 31.3 [C(4)H<sub>2</sub>], 49.4 (NCH), 126.4, 128.1, 128.5, 128.8, 129.9, 131.1 (aromatic CH) 133.6,

143.2, 143.7, 143.7 (quaternary aromatic C and PhSC= and CCl=), 163.9 (CO);  $m/z$  (EI) 345 ( $M^+$ , 18%), 310 (8,  $M^+ - Cl$ ), 208 (29), 117 (35), 105 (100,  $[PhCHCH_3]^+$ ).

### Treatment of *N*-4'-methylphenyl-2-(phenylthio)-3-phenylpropanamide **85** with NCS

This was conducted following the procedure described for  $\beta$ -chloroacrylamide **57** using sulfide **50** (186 mg, 0.54 mmol), NCS (156 mg, 1.18 mmol) in carbon tetrachloride (3.5 ml) under reflux conditions for 18 hours to give a reaction mixture with 3 spots by TLC analysis (168 mg). Chromatographic purification using ethyl acetate-hexane (5:95) gave *Z*- and *E*- *N*-4'-methylphenyl-3-chloro-2-(phenylthio)-3-phenylpropenamide **99** & **100** which were characterised as a mixture of isomers (essentially equimolar) (29 mg, 14 %) (Rf 0.2 using ethyl acetate-hexane (25:75) as eluent) as a white, crystalline solid, mp 183-186 °C; (Found C, 69.22; H, 4.85; N, 3.76; Cl, 9.74.  $C_{22}H_{18}ClNOS$  requires C, 69.55; H, 4.78; N, 3.69; Cl, 9.33%);  $\nu_{max}/cm^{-1}$  (KBr) 3274 (br NH), 1648, 1598 (CO  $\alpha,\beta$ -unsaturated amide);  $\delta_H$  (270 MHz) 2.23, 2.29 (3H, s,  $ArCH_3$ ), 6.71-7.60 (14H aromatic; distinctive ABq seen at 6.71-6.93 for *o*-hydrogens in one isomer), 7.75 (1H, br s, NH);  $\delta_C$  (67.8 MHz) 20.9 ( $ArCH_3$ ), 120.4, 120.6 (aromatic CH), 128.1-134.8 (overlapping signals, aromatic CH, quaternary aromatic C and PSC=), 136.7, 137.2 (CCl=), 161.5, 162.2 (CO); MS  $m/z$  379 ( $M^+$ , 26 %), 344 (8,  $M^+ - Cl$ ), 273 (21), 210 (100,  $[PhS=C=CPh]^+$ ), 91(5), 77 (11), *N*-4'-methylphenyl-3-phenyl-*Z*-2-(phenylthio)propenamide **123** (tentatively assigned) (71 mg, 49 %) (Rf 0.3) as a colourless, low-melting solid;  $\delta_H$  (270 MHz) 2.28 (3H, s,  $ArCH_3$ ), 7.07-7.85 (14H, m,  $ArH$ ), 8.51 (1H, s,  $CHCl=$ ), 8.94 (1H, br s, NH);  $\delta_C$  (67.8 MHz) 20.9 ( $ArCH_3$ ), 120.2 (aromatic CH), 124.5 (quaternary aromatic C), 126.7, 127.1, 128.4, 129.0, 129.9, 130.7 (aromatic CH), 134.3, 134.7, 135.1, 137.3 (quaternary aromatic C or PhSC=), 147.2 ( $=CHPh$ ), 162.9 (CO); a third compound tentatively identified as *N*-4'-methylphenyl-3-chloro-2-phenylpropenamide **113** was isolated (12 mg, 8 %) (Rf 0.2) as a light yellow, low-melting solid, mp 35-37 °C;  $\nu_{max}/cm^{-1}$  (neat) 3403 (br NH), 1694, 1594 (CO  $\alpha,\beta$ -unsaturated amide);  $\delta_H$  (270 MHz) 2.35 (3H, s,  $ArCH_3$ ), 7.08-7.82 (9H, m,  $ArH$ ), 8.13 (1H, s,  $CHCl=$ ), 8.48 (1H, br s, NH);  $\delta_C$  as a mixture with acrylamide **123** 171.0 (CO); MS  $m/z$  271.07575  $C_{16}H_{14}ClNO$  requires  $M^+$  271.07639; 271( $M^+$ , 75 %), 236 (90,  $M^+ - Cl$ ), 211 (24), 165

(100), 137 (70), 102 (70), 91(12), 77 (28).

## References

1. A. Bernardi, S. Cardani, L. Colombo, G. Poli, G. Schimperna, C. Scolastico, *J. Org. Chem.*, 1987, **52**, 888-891.
2. Y. Petit, M. Larcheveque, *Org. Synth.*, 1997, **75**, 37-43.
3. D.D. Perrin, W.L.F. Armarego, D.R. Perrin, *Purification of Laboratory Chemicals*, Permagon Press, Oxford, 1980.
4. R. Wolffenstein, J. Rolle, *Org. Lab.*, 1908, **41**, 733.
5. S. Kushner, R.I. Cassell, J. Morton, J.H. Williams, *J. Org. Chem.*, 1951, **16**, 1283.
6. T. Aoyama, T. Nakano, K. Marumo, Y. Uno, T. Shioiri, *Synthesis*, 1991, 1163-1167
7. A.H. Schlesinger, E.J. Prill, *J. Am. Chem. Soc.*, 1956, 6123-6127.
8. R. Pohloudek-Fabini, E. Schroepi, *Pharmazie*, 1968, **23**, 561.
9. A. Kirmann, G. Oestermann, *Bull. Soc. Chem. Fr.*, 1948, 168.
10. C.L. Stevens, T.K. Mukherjee, V.J Traynelis, *J. Am. Chem. Soc.*, 1956, **78**, 2264.
11. Y. Mori, S. Fujiwara, T. Miyachi, H. Kitanishi, M. Oya, K. Yamamoto, M. Suzuki, *Chem. Pharm. Bull.*, 1983, **31**, 1505-1517.
12. K. Masuya, K. Domon, K. Tanino, I. Kuwajima, *J. Am. Chem. Soc.*, 1998, **120**, 1724-1731.
